# Supplementary material
Source: publisher site journal article supplement (https://www.dovepress.com/article/357144)
Supplement: Supplementary file 1 [file get_supplementary_file.php]

Supplementary Table 1 The clinical conditions of 30 samples

| No. | Sampling time | Pathological type  | ER positive rate | PR positive rate | HER2 status | Ki-67 expression | Lymph node stage | Tumor size | Age | side of affected breast |
|-----|---------------|--------------------|------------------|------------------|-------------|------------------|------------------|------------|-----|-------------------------|
| A01 | 2020.12.18    | Invasive carcinoma | 70%              | 80%              | negative    | 30%              | N2               | T2         | 48  | R                       |
| A02 | 2020.12.21    | Invasive carcinoma | 80%              | 80%              | negative    | 30%              | N1               | T2         | 51  | R                       |
| A03 | 2020.12.23    | Invasive carcinoma | 80%              | 80%              | negative    | 20%              | N0               | T1         | 71  | L                       |
| A04 | 2020.12.23    | Invasive carcinoma | 90%              | 90%              | negative    | 20%              | N0               | T1         | 36  | L                       |
| A05 | 2020.12.24    | Invasive carcinoma | 90%              | 70%              | negative    | 50%              | N1               | T2         | 44  | L                       |
| A06 | 2020.12.16    | Invasive carcinoma | 100%             | 100%             | negative    | 10%              | N2               | T3         | 50  | R                       |
| B01 | 2021.01.11    | Invasive carcinoma | 80%              | 0%               | negative    | 15%              | N1               | T1         | 39  | R                       |
| B02 | 2020.12.21    | Invasive carcinoma | 90%              | 1%               | negative    | 10%              | N1               | T1         | 27  | R                       |
| B03 | 2020.12.23    | Invasive carcinoma | 15%              | 5%               | negative    | 40%              | N1               | T2         | 37  | L                       |
| B04 | 2020.12.23    | Invasive carcinoma | 90%              | 5%               | negative    | 30%              | N0               | T2         | 63  | L                       |
| B05 | 2021.01.13    | Invasive carcinoma | 90%              | 10%              | negative    | 30%              | N0               | T1         | 48  | L                       |
| B06 | 2021.01.04    | Invasive carcinoma | 50%              | 20%              | negative    | 20%              | N3               | T3         | 61  | L                       |
| C01 | 2020.01.11    | Invasive carcinoma | 80%              | 60%              | Positive    | 20%              | N0               | T1         | 47  | R                       |
| C02 | 2020.12.25    | Invasive carcinoma | 80%              | 80%              | Positive    | 40%              | N1               | T2         | 50  | R                       |
| C03 | 2020.12.25    | Invasive carcinoma | 80%              | 40%              | Positive    | 40%              | N2               | T2         | 58  | R                       |
| C04 | 2020.12.30    | Invasive carcinoma | 40%              | 40%              | Positive    | 30%              | N1               | T2         | 38  | R                       |
| C05 | 2021.01.06    | Invasive carcinoma | 0%               | 5%               | Positive    | 40%              | N0               | T1         | 55  | R                       |
| C06 | 2021.01.20    | Invasive carcinoma | 40%              | 25%              | Positive    | 40%              | N0               | T1         | 53  | L                       |
| D01 | 2020.12.18    | Invasive carcinoma | 0%               | 0%               | Positive    | 50%              | N0               | T1         | 43  | L                       |
| D02 | 2020.12.23    | Invasive carcinoma | 0%               | 0%               | Positive    | 40%              | N0               | T1         | 59  | L                       |
| D03 | 2020.12.28    | Invasive carcinoma | 0%               | 0%               | Positive    | 40%              | N1               | T2         | 48  | L                       |
| D04 | 2021.01.06    | Invasive carcinoma | 0%               | 0%               | Positive    | 30%              | N0               | T2         | 58  | L                       |
| D05 | 2021.01.08    | Invasive carcinoma | 0%               | 0%               | Positive    | 70%              | N1               | T2         | 52  | R                       |

| No. | Sampling time | Pathological type  | ER positive rate | PR positive rate | HER2 status | Ki-67 expression | Lymph node stage | Tumor size | Age | side of affected breast |
|-----|---------------|--------------------|------------------|------------------|-------------|------------------|------------------|------------|-----|-------------------------|
| D06 | 2021.01.11    | Invasive carcinoma | 0%               | 0%               | Positive    | 30%              | N1               | T1         | 55  | R                       |
| E01 | 2020.12.14    | Invasive carcinoma | 0%               | 0%               | negative    | 30%              | N1               | T2         | 57  | R                       |
| E02 | 2020.12.25    | Invasive carcinoma | 0%               | 0%               | negative    | 80%              | N0               | T1         | 39  | R                       |
| E03 | 2020.12.25    | Invasive carcinoma | 0%               | 0%               | negative    | 40%              | N1               | T1         | 48  | R                       |
| E04 | 2020.12.28    | Invasive carcinoma | 0%               | 0%               | negative    | 30%              | N1               | T2         | 54  | L                       |
| E05 | 2021.01.25    | Invasive carcinoma | 0%               | 0%               | negative    | 30%              | N3               | T2         | 59  | L                       |
| E06 | 2021.01.22    | Invasive carcinoma | 0%               | 0%               | negative    | 70%              | N0               | T1         | 44  | R                       |

Group A. ER(+) and positive rate  $\geq 70\%$ , PR(+) and positive rate  $\geq 70\%$ , HER2(-); Group B. ER(+), PR(+) and positive rate  $\leq 20\%$  or PR(-), HER2(-); Group C. Positive for either estrogen or progesterone receptor or both, HER2(-); Group D. ER(-), PR(-), HER2(+). Group E. ER(-), PR(-), HER2(-).

Supplementary Table 2 The clinical conditions and follow-up results of the 50 patients

| No. | Operation time | Pathologic type    | ER positive rate | PR positive rate | HER2 status | Ki-67 expression | Lymph node stage | Tumor stage | Age | Alive/Death | Metastasis site                                  | Metastasis time | Time of death | Survival time (D) | PFS (D) | Disease side | T SCD1 % | T SORBS1 % | Cause of death |
|-----|----------------|--------------------|------------------|------------------|-------------|------------------|------------------|-------------|-----|-------------|--------------------------------------------------|-----------------|---------------|-------------------|---------|--------------|----------|------------|----------------|
| 1   | 2015.01.05     | Invasive carcinoma | 80%              | 70%              | Negative    | 35%              | N2               | T2          | 48  | Alive       | None                                             |                 |               | 2321              | 2321    | R            | 5        | 60         |                |
| 2   | 2015.01.05     | Invasive carcinoma | 0%               | 0%               | Positive    | 30%              | N1               | T1          | 55  | Alive       | None                                             |                 |               | 2321              | 2321    | R            | 15       | 70         |                |
| 3   | 2015.01.05     | Invasive carcinoma | 0%               | 0%               | Positive    | 40%              | N1               | T2          | 48  | Alive       | Soft tissue of chest wall and liver              | 2018.03.18      |               | 2321              | 1168    | L            | 55       | 15         |                |
| 4   | 2015.01.09     | Invasive carcinoma | 80%              | 5%               | Negative    | 15%              | N2               | T2          | 49  | Alive       | skeleton                                         | 2017.04.21      |               | 2317              | 833     | R            | 60       | 15         |                |
| 5   | 2015.01.12     | Invasive carcinoma | 80%              | 90%              | Negative    | 25%              | N0               | T1          | 72  | Alive       | None                                             |                 |               | 2314              | 2314    | L            | 10       | 70         |                |
| 6   | 2015.01.12     | Invasive carcinoma | 0%               | 0%               | Positive    | 70%              | N2               | T2          | 50  | Alive       | Brain and skeleton and soft tissue of chest wall | 2018.12.24      |               | 2314              | 1442    | R            | 70       | 5          |                |
| 7   | 2015.01.12     | Invasive carcinoma | 0%               | 0%               | Negative    | 30%              | N1               | T2          | 57  | Alive       | None                                             |                 |               | 2314              | 2314    | R            | 20       | 40         |                |
| 8   | 2015.01.14     | Invasive carcinoma | 90%              | 70%              | Negative    | 50%              | N1               | T2          | 45  | Alive       | Lung                                             | 2020.12.11      |               | 2312              | 2158    | L            | 65       | 10         |                |
| 9   | 2015.01.14     | Invasive carcinoma | 20%              | 5%               | Negative    | 40%              | N1               | T2          | 37  | Alive       | Lung                                             | 2017.02.26      |               | 2312              | 1139    | L            | 60       | 15         |                |
| 10  | 2015.01.16     | Invasive carcinoma | 70%              | 80%              | Positive    | 40%              | N1               | T2          | 50  | Alive       | None                                             |                 |               | 2310              | 2310    | R            | 5        | 65         |                |

| No. | Operation time | Pathologic type    | ER positive rate | PR positive rate | HER2 status | Ki-67 expression | Lymph node stage | Tumor stage | Age | Alive/Death | Metastasis site                 | Metastasis time | Time of death | Survival time (D) | PFS (D) | Disease side | T SCD1 % | T SORBS1 % | Cause of death |
|-----|----------------|--------------------|------------------|------------------|-------------|------------------|------------------|-------------|-----|-------------|---------------------------------|-----------------|---------------|-------------------|---------|--------------|----------|------------|----------------|
| 11  | 2015.01.19     | Invasive carcinoma | 20%              | 10%              | Negative    | 60%              | N0               | T1          | 36  | Alive       | skeleton and ipsilateral breast | 2016.12.05      |               | 2307              | 686     | R            | 40       | 20         |                |
| 12  | 2015.01.19     | Invasive carcinoma | 90%              | 80%              | Negative    | 40%              | N0               | T1          | 49  | Alive       | None                            |                 |               | 2307              | 2307    | L            | 15       | 50         |                |
| 13  | 2015.01.21     | Invasive carcinoma | 0%               | 0%               | Positive    | 70%              | N1               | T2          | 52  | Death       | Brain                           | 2016.01.24      | 2017.12.01    | 1045              | 368     | R            | 70       | 5          | Breast cancer  |
| 14  | 2015.01.23     | Invasive carcinoma | 85%              | 0%               | Negative    | 15%              | N1               | T1          | 39  | Alive       | None                            |                 |               | 2303              | 2303    | R            | 5        | 5          |                |
| 15  | 2015.01.26     | Invasive carcinoma | 90%              | 1%               | Negative    | 10%              | N1               | T1          | 26  | Alive       | None                            |                 |               | 2300              | 2300    | R            | 15       | 15         |                |
| 16  | 2015.01.28     | Invasive carcinoma | 0%               | 0%               | Negative    | 70%              | N0               | T1          | 44  | Alive       | Brain and skeleton              | 2018.03.12      |               | 2298              | 1139    | R            | 75       | 20         |                |
| 17  | 2015.01.30     | Invasive carcinoma | 90%              | 5%               | Negative    | 30%              | N0               | T2          | 63  | Alive       | skeleton                        | 2019.05.06      |               | 2296              | 1557    | L            | 55       | 20         |                |
| 18  | 2015.01.30     | Invasive carcinoma | 0%               | 0%               | Negative    | 80%              | N0               | T1          | 37  | Death       | Brain                           | 2016.01.14      | 2016.10.01    | 610               | 349     | R            | 85       | 0          | Breast cancer  |
| 19  | 2015.02.02     | Invasive carcinoma | 55%              | 20%              | Negative    | 20%              | N3               | T3          | 65  | Alive       | Liver                           | 2017.08.09      |               | 2293              | 919     | L            | 65       | 5          |                |
| 20  | 2015.02.02     | Invasive carcinoma | 0%               | 0%               | Positive    | 40%              | N0               | T1          | 59  | Alive       | Brain and liver                 | 2017.03.15      |               | 2293              | 772     | L            | 70       | 15         |                |
| 21  | 2015.02.06     | Invasive carcinoma | 90%              | 80%              | Negative    | 30%              | N1               | T2          | 50  | Alive       | None                            |                 |               | 2289              | 2289    | R            | 10       | 80         |                |

| No. | Operation time | Pathologic type    | ER positive rate | PR positive rate | HER2 status | Ki-67 expression | Lymph node stage | Tumor stage | Age | Alive/Death | Metastasis site           | Metastasis time | Time of death | Survival time (D) | PFS (D) | Disease side | T SCD1 % | T SORBS1 % | Cause of death |
|-----|----------------|--------------------|------------------|------------------|-------------|------------------|------------------|-------------|-----|-------------|---------------------------|-----------------|---------------|-------------------|---------|--------------|----------|------------|----------------|
| 22  | 2015.02.06     | Invasive carcinoma | 0%               | 0%               | Negative    | 30%              | N3               | T2          | 58  | Death       | Brain and lung            | 2020.07.20      | 2021.01.01    | 2156              | 1991    | L            | 65       | 5          | Breast cancer  |
| 23  | 2015.02.09     | Invasive carcinoma | 60%              | 60%              | Positive    | 20%              | N0               | T1          | 47  | Alive       | None                      |                 |               | 2286              | 2286    | R            | 10       | 15         |                |
| 24  | 2015.02.09     | Invasive carcinoma | 80%              | 30%              | Positive    | 40%              | N2               | T2          | 56  | Alive       | Lung and liver            | 2018.01.22      |               | 2286              | 1078    | R            | 50       | 55         |                |
| 25  | 2015.02.27     | Invasive carcinoma | 40%              | 30%              | Positive    | 30%              | N1               | T2          | 36  | Alive       | Pelvic cavity             | 2020.05.17      |               | 2268              | 1906    | R            | 60       | 40         |                |
| 26  | 2015.02.27     | Invasive carcinoma | 10%              | 5%               | Positive    | 40%              | N0               | T1          | 55  | Alive       | Soft tissue of chest wall | 2018.07.12      |               | 2268              | 1231    | R            | 60       | 35         |                |
| 27  | 2015.02.27     | Invasive carcinoma | 30%              | 25%              | Positive    | 40%              | N0               | T1          | 53  | Alive       | None                      |                 |               | 2268              | 2268    | L            | 30       | 65         |                |
| 28  | 2015.03.02     | Invasive carcinoma | 0%               | 0%               | Positive    | 45%              | N0               | T1          | 44  | Alive       | Brain                     | 2017.12.12      |               | 2265              | 1016    | L            | 70       | 0          |                |
| 29  | 2015.03.02     | Invasive carcinoma | 0%               | 0%               | Negative    | 40%              | N1               | T1          | 48  | Alive       | Lung and liver            | 2018.07.19      |               | 2265              | 1235    | R            | 25       | 0          |                |
| 30  | 2015.03.02     | Invasive carcinoma | 90%              | 90%              | Negative    | 10%              | N3               | T3          | 50  | Alive       | None                      |                 |               | 2265              | 2265    | R            | 70       | 90         |                |
| 31  | 2015.03.04     | Invasive carcinoma | 0%               | 0%               | Positive    | 30%              | N2               | T2          | 60  | Alive       | None                      |                 |               | 2263              | 2263    | L            | 10       | 60         |                |
| 32  | 2015.03.06     | Invasive carcinoma | 100%             | 100%             | Negative    | 10%              | N2               | T3          | 48  | Alive       | None                      |                 |               | 2261              | 2261    | R            | 25       | 80         |                |

| No. | Operation time | Pathologic type    | ER positive rate | PR positive rate | HER2 status | Ki-67 expression | Lymph node stage | Tumor stage | Age | Alive/Death | Metastasis site                                        | Metastasis time | Time of death | Survival time (D) | PFS (D) | Disease side | T SCD1 % | T SORBS1 % | Cause of death |
|-----|----------------|--------------------|------------------|------------------|-------------|------------------|------------------|-------------|-----|-------------|--------------------------------------------------------|-----------------|---------------|-------------------|---------|--------------|----------|------------|----------------|
| 33  | 2015.03.06     | Invasive carcinoma | 0%               | 0%               | Negative    | 80%              | N0               | T2          | 47  | Death       | Brain and soft tissue of chest wall and liver and lung | 2015.10.26      | 2016.09.01    | 545               | 234     | L            | 80       | 10         | Breast cancer  |
| 34  | 2015.03.06     | Invasive carcinoma | 90%              | 90%              | Negative    | 10%              | N0               | T1          | 36  | Alive       | None                                                   |                 |               | 2261              | 2261    | L            | 15       | 70         |                |
| 35  | 2015.03.06     | Invasive carcinoma | 1%               | 40%              | Negative    | 50%              | N3               | T3          | 58  | Alive       | Lung and liver and skeleton                            | 2016.06.15      |               | 2261              | 467     | L            | 70       | 20         |                |
| 36  | 2015.03.09     | Invasive carcinoma | 0%               | 0%               | Negative    | 30%              | N1               | T2          | 54  | Alive       | None                                                   |                 |               | 2258              | 2258    | L            | 20       | 60         |                |
| 37  | 2015.03.09     | Invasive carcinoma | 80%              | 70%              | Negative    | 15%              | N1               | T2          | 42  | Alive       | None                                                   |                 |               | 2258              | 2258    | L            | 15       | 75         |                |
| 38  | 2015.03.09     | Invasive carcinoma | 80%              | 80%              | Negative    | 40%              | N3               | T3          | 40  | Alive       | Liver and skeleton                                     | 2020.10.23      |               | 2258              | 2055    | R            | 80       | 25         |                |
| 39  | 2015.03.09     | Invasive carcinoma | 0%               | 0%               | Negative    | 70%              | N3               | T2          | 53  | Death       | Soft tissue of chest wall and liver and lung           | 2017.02.17      | 2019.05.01    | 1514              | 711     | R            | 90       | 0          | Breast cancer  |
| 40  | 2015.03.09     | Invasive carcinoma | 30%              | 30%              | Negative    | 30%              | N0               | T1          | 34  | Alive       | None                                                   |                 |               | 2258              | 2258    | L            | 25       | 90         |                |
| 41  | 2015.03.11     | Invasive carcinoma | 90%              | 95%              | Negative    | 20%              | N0               | T1          | 37  | Alive       | None                                                   |                 |               | 2256              | 2256    | L            | 15       | 65         |                |
| 42  | 2015.03.13     | Invasive carcinoma | 90%              | 0%               | Negative    | 20%              | N3               | T2          | 66  | Alive       | Lung and skeleton                                      | 2018.12.07      |               | 2254              | 1365    | L            | 55       | 45         |                |

| No. | Operation time | Pathologic type    | ER positive rate | PR positive rate | HER2 status | Ki-67 expression | Lymph node stage | Tumor stage | Age | Alive/Death | Metastasis site      | Metastasis time | Time of death | Survival time (D) | PFS (D) | Disease side | T SCD1 % | T SORBS1 % | Cause of death |
|-----|----------------|--------------------|------------------|------------------|-------------|------------------|------------------|-------------|-----|-------------|----------------------|-----------------|---------------|-------------------|---------|--------------|----------|------------|----------------|
| 43  | 2015.03.13     | Invasive carcinoma | 0%               | 10%              | Positive    | 20%              | N1               | T1          | 50  | Alive       | Lung                 | 2020.05.16      |               | 2254              | 1891    | R            | 75       | 15         |                |
| 44  | 2015.03.16     | Invasive carcinoma | 90%              | 15%              | Negative    | 30%              | N0               | T1          | 48  | Alive       | None                 |                 |               | 2251              | 2251    | L            | 25       | 60         |                |
| 45  | 2015.03.16     | Invasive carcinoma | 90%              | 60%              | Negative    | 30%              | N2               | T2          | 58  | Alive       | None                 |                 |               | 2251              | 2251    | R            | 30       | 70         |                |
| 46  | 2015.03.16     | Invasive carcinoma | 0%               | 0%               | Negative    | 40%              | N0               | T1          | 54  | Alive       | None                 |                 |               | 2251              | 2251    | R            | 25       | 65         |                |
| 47  | 2015.03.18     | Invasive carcinoma | 0%               | 0%               | Positive    | 30%              | N0               | T2          | 56  | Alive       | Regional lymph nodes | 2021.01.12      |               | 2249              | 2127    | L            | 55       | 45         |                |
| 48  | 2015.03.20     | Invasive carcinoma | 90%              | 5%               | Negative    | 40%              | N2               | T2          | 53  | Alive       | Skeleton             | 2019.04.09      |               | 2247              | 1481    | L            | 60       | 70         |                |
| 49  | 2015.03.20     | Invasive carcinoma | 80%              | 20%              | Negative    | 30%              | N2               | T2          | 58  | Alive       | Skeleton             | 2020.09.22      |               | 2247              | 2013    | R            | 65       | 25         |                |
| 50  | 2015.03.23     | Invasive carcinoma | 90%              | 90%              | Negative    | 30%              | N0               | T1          | 47  | Alive       | None                 |                 |               | 2244              | 2244    | L            | 70       | 5          |                |

Supplementary Table 3 Clinical characteristics of 881 patients with complete information

| Feature           | Group   | Number | t      | p-value |
|-------------------|---------|--------|--------|---------|
| fustate           | Dead    | 126    | 1.4006 | 0.3947  |
|                   | Alive   | 755    |        |         |
| Age               | <60year | 511    | 6.2482 | 0.101   |
|                   | >60year | 370    |        |         |
| Gender            | female  | 870    | 1.0256 | 0.492   |
|                   | male    | 11     |        |         |
| Ajcc_pathologic_m | M0      | 864    | 1.0401 | 0.4875  |
|                   | M1      | 17     |        |         |
| Ajcc_pathologic_n | N0      | 432    | 2.5123 | 0.08677 |
|                   | N1      | 294    |        |         |



---

| <b>Feature</b>        | <b>Group</b> | <b>Number</b> | <b>t</b> | <b>p-value</b> |
|-----------------------|--------------|---------------|----------|----------------|
|                       | N2           | 102           |          |                |
|                       | N3           | 53            |          |                |
| Ajcc_pathologic_stage | Stage I      | 155           | 2.0961   | 0.127          |
|                       | Stage II     | 514           |          |                |
|                       | Stage III    | 195           |          |                |
|                       | Stage IV     | 17            |          |                |
| Ajcc_pathologic_t     | T1           | 231           | 2.0235   | 0.1362         |
|                       | T2           | 522           |          |                |
|                       | T3           | 97            |          |                |
|                       | T4           | 31            |          |                |

---

Supplementary Table 4 Characteristics of primary BRCA subjects in GSE109169 dataset

| <b>feature</b> | <b>group</b> | <b>number</b> | <b>t</b> | <b>p-value</b> |
|----------------|--------------|---------------|----------|----------------|
| tissue         | Normal       | 25            |          |                |
|                | Tumor        | 25            |          |                |
| Sex            | female       | 25            |          |                |
|                | male         | 0             |          |                |
| Age            | <60          | 25            |          |                |
|                | >60          | 0             |          |                |
| Stage          | I            | 6             | 3.8348   | 0.01854        |
|                | IIA          | 8             |          |                |
|                | IIB          | 3             |          |                |
|                | IIIA         | 7             |          |                |
|                | IIIC         | 1             |          |                |

Supplementary Table 5 Characteristics of primary BRCA subjects in GSE20685 dataset

| Feature           | Group          | Number | t      | p-value  |
|-------------------|----------------|--------|--------|----------|
| fustate           | Dead           | 71     | 1.4006 | 0.3947   |
|                   | Alive          | 207    |        |          |
| Age               | <60year        | 232    | 6.2482 | 0.101    |
|                   | >60year        | 46     |        |          |
| Gender            | female         | 278    | 1.4279 | 0.3889   |
|                   | male           | 0      |        |          |
| event_metastasis  | metastasis     | 204    | 2.1385 | 0.2785   |
|                   | non_metastasis | 74     |        |          |
| subtype           | I              | 33     | 5.4362 | 0.002858 |
|                   | II             | 27     |        |          |
|                   | III            | 40     |        |          |
|                   | IV             | 68     |        |          |
|                   | V              | 33     |        |          |
|                   | VI             | 77     |        |          |
| ajcc_pathologic_m | M0             | 271    | 1.053  | 0.4836   |
|                   | M1             | 7      |        |          |
| ajcc_pathologic_n |                |        |        |          |

| <b>Feature</b>        | <b>Group</b> | <b>Number</b> | <b>t</b> | <b>p-value</b> |
|-----------------------|--------------|---------------|----------|----------------|
| ajcc_pathologic_stage | N0           | 118           | 3.9489   | 0.02896        |
|                       | N1           | 71            |          |                |
|                       | N2           | 52            |          |                |
|                       | N3           | 37            |          |                |
| ajcc_pathologic_t     | Stage I      | 155           | 2.0961   | 0.127          |
|                       | Stage II     | 514           |          |                |
|                       | Stage III    | 195           |          |                |
|                       | Stage IV     | 17            |          |                |
| ajcc_pathologic_t     | T1           | 85            | 1.9696   | 0.1435         |
|                       | T2           | 162           |          |                |
|                       | T3           | 22            |          |                |
|                       | T4           | 8             |          |                |

Supplementary Table 6 A list of 1499 lipid metabolism-related genes integrated from MSigDB and GO databases

| Gene Name |        |       |         |         |         |  |
|-----------|--------|-------|---------|---------|---------|--|
| B3GALT1   | ACSL3  | ARF1  | CLN3    | DGKA    | FABP3   |  |
| B3GALT2   | ACSL4  | ARF3  | CNEP1R1 | DGKB    | FABP4   |  |
| B4GALT3   | AGAP2  | ATG14 | CPNE1   | DGKD    | FABP5   |  |
| FA2H      | AGK    | ATM   | CPNE3   | DGKE    | FABP6   |  |
| GAL3ST1   | AGMO   | AVIL  | CPNE6   | DGKG    | FABP7   |  |
| GALC      | AGPAT1 | AWAT2 | CPNE7   | DGKH    | FABP9   |  |
| GBA3      | AGPAT2 | BMX   | CPS1    | DGKI    | FAM126A |  |
| PNLIPRP2  | AGPAT3 | BPNT1 | CPT1A   | DGKK    | FAM126B |  |
| PSAP      | AGPAT4 | BPNT2 | CRLS1   | DGKQ    | FAR1    |  |
| UGT8      | AGPAT5 | C3    | CSF1R   | DGKZ    | FBXW7   |  |
| AADAC     | AJUBA  | CAPN2 | CSNK2A1 | DNAJC19 | FGF2    |  |
| ABHD12    | ALOX15 | CAT   | CSNK2A2 | DPM1    | FGF21   |  |
| ABHD12B   | ALPI   | CAV1  | CSNK2B  | DPM2    | FIG4    |  |
| ABHD16A   | ANG    | CAV3  | CTDNEP1 | DPM3    | FITM2   |  |
| ABHD16B   | APOA1  | CDIPT | CWH43   | EFR3A   | FPR2    |  |

---

Gene Name

---

|       |         |        |          |        |       |
|-------|---------|--------|----------|--------|-------|
| ABHD2 | APOA2   | CDS1   | CYP2E1   | EFR3B  | G6PC  |
| ABHD3 | APOA4   | CDS2   | DAGLA    | ENPP2  | GALR2 |
| ABHD4 | APOA5   | CEPT1  | DAGLB    | ENPP6  | GDE1  |
| ABHD5 | APOB    | CETP   | DBI      | ETNK1  | GDPD1 |
| ABHD6 | APOBEC1 | CHAT   | DDHD1    | ETNK2  | GDPD3 |
| ABHD8 | APOBR   | CHKA   | DDHD2    | ETNPPL | GK    |
| ACHE  | APOC1   | CHKB   | DGAT1    | FAAH   | GK2   |
| ACP6  | APOC2   | CHPT1  | DGAT2    | FABP1  | GK5   |
| ACSL1 | APOC3   | CHRM5  | DGAT2L6  | FABP12 | GNB3  |
| APOH  | APOE    | CISH   | DGAT2L7P | FABP2  | GNPAT |
| GPAA1 | INPP5F  | LPCAT3 | MTMR10   | PCSK9  | PIGB  |
| GPAM  | INPP5J  | LPCAT4 | MTMR11   | PCTP   | PIGC  |
| GPAT2 | INPP5K  | LPGAT1 | MTMR12   | PCYT1A | PIGF  |
| GPAT3 | INPPL1  | LPIN1  | MTMR14   | PCYT1B | PIGG  |
| GPAT4 | INSIG1  | LPIN2  | MTMR2    | PCYT2  | PIGH  |

---

---

Gene Name

---

|        |        |         |         |          |      |
|--------|--------|---------|---------|----------|------|
| GPCPD1 | INSIG2 | LPIN3   | MTMR3   | PDGFA    | PIGK |
| GPD1   | IP6K1  | LPL     | MTMR4   | PDGFB    | PIGL |
| GPD1L  | IP6K2  | LYPLA2  | MTMR6   | PDGFRB   | PIGM |
| GPLD1  | IP6K3  | MBOAT1  | MTMR7   | PDXP     | PIGN |
| GPX1   | IPMK   | MBOAT2  | MTMR8   | PEMT     | PIGO |
| HADHA  | ITPKA  | MBOAT7  | MTMR9   | PGAP1    | PIGP |
| HADHB  | ITPKB  | MECP2   | NAPEPLD | PGAP2    | PIGQ |
| HDHD5  | ITPKC  | MFSD2A  | NKX2-3  | PGAP3    | PIGS |
| HTR2A  | LCAT   | MGLL    | NR1H2   | PGAP4    | PIGT |
| HTR2B  | LCLAT1 | MIR29B1 | NR1H3   | PGP      | PIGU |
| HTR2C  | LDLR   | MIR29B2 | NR1H4   | PGS1     | PIGV |
| IMPA1  | LIPC   | MIR30C1 | OCRL    | PHB2     | PIGW |
| IMPA2  | LIPE   | MIR30C2 | OSBPL10 | PHOSPHO1 | PIGX |
| INPP1  | LIPF   | MIR548P | OSBPL5  | PI4K2A   | PIGY |
| INPP4A | LIPG   | MOGAT1  | OSBPL8  | PI4K2B   | PIGZ |

---

## Gene Name

---

|         |          |         |          |         |          |
|---------|----------|---------|----------|---------|----------|
| INPP4B  | LIPH     | MOGAT2  | P3R3URF  | PI4KA   | PIK3C2A  |
| INPP5A  | LIPI     | MOGAT3  | PAFAH1B1 | PI4KAP1 | PIK3C2B  |
| INPP5B  | LMF1     | MPPE1   | PANK2    | PI4KAP2 | PIK3C2G  |
| INPP5D  | LPCAT1   | MTM1    | PCK1     | PI4KB   | PIK3C3   |
| INPP5E  | LPCAT2   | MTMR1   | PCK2     | PIGA    | PIK3CA   |
| PIK3CD  | PLA2G12A | PLCD4   | PRDX6    | SH3YL1  | STOML2   |
| PIK3CG  | PLA2G15  | PLCE1   | PTDSS1   | SIK1    | SYNJ1    |
| PIK3R1  | PLA2G1B  | PLCG2   | PTDSS2   | SIRT1   | SYNJ2    |
| PIK3R2  | PLA2G2A  | PLCH2   | PTEN     | SLA2    | TAMM41   |
| PIK3R3  | PLA2G2D  | PLD1    | PTPMT1   | SLC22A4 | TAZ      |
| PIK3R4  | PLA2G2E  | PLD2    | PTPN11   | SLC27A1 | TBL1XR1  |
| PIK3R5  | PLA2G2F  | PLD6    | PTPN13   | SLC27A5 | THEM5    |
| PIK3R6  | PLA2G3   | PLEK    | PYURF    | SLC44A1 | THRSP    |
| PIKFYVE | PLA2G4A  | PLEKHA1 | RAB14    | SLC44A2 | TMEM150A |
| PIP4K2A | PLA2G4B  | PLEKHA2 | RAB38    | SLC44A3 | TMEM86B  |

---



## Gene Name

---

|         |         |         |         |         |          |
|---------|---------|---------|---------|---------|----------|
| PIP4K2B | PLA2G4C | PLEKHA3 | RAB4A   | SLC44A4 | TPTE     |
| PIP4K2C | PLA2G4D | PLEKHA4 | RAB5A   | SLC44A5 | TPTE2    |
| PIP4P1  | PLA2G4E | PLEKHA8 | RGN     | SMG1    | TTC7A    |
| PIP4P2  | PLA2G4F | PLIN5   | RUFY1   | SMPD4   | TTC7B    |
| PIP5K1A | PLA2G5  | PLSCR1  | SACM1L  | SOCS1   | VAC14    |
| PIP5K1B | PLA2G6  | PLSCR3  | SBF1    | SOCS2   | ZP3      |
| PIP5K1C | PLA2G7  | PNPLA1  | SCARB1  | SOCS3   | A3GALT2  |
| PIP5KL1 | PLAAT1  | PNPLA2  | SEL1L   | SOCS4   | A4GALT   |
| PIPSL   | PLAAT2  | PNPLA3  | SELENOI | SOCS5   | ARSA     |
| PISD    | PLAAT3  | PNPLA4  | SERAC1  | SOCS6   | ASAH1    |
| PITPNM1 | PLAAT4  | PNPLA5  | SERINC1 | SOCS7   | B3GALNT1 |
| PITPNM2 | PLAAT5  | PNPLA6  | SERINC2 | SORL1   | B3GALT4  |
| PITPNM3 | PLB1    | PNPLA7  | SERINC3 | SREBF1  | B4GALNT1 |
| PLA1A   | PLBD1   | PNPLA8  | SERINC5 | STARD10 | B4GALT5  |
| B4GALT6 | NEU3    | ABCA2   | ACADVL  | ACSL5   | ADTRP    |

---

---

Gene Name

---

|       |            |            |        |        |         |
|-------|------------|------------|--------|--------|---------|
| BAX   | NEU4       | ABCA4      | ACAT1  | ACSL6  | AFP     |
| CERK  | PRKAA1     | ABCB11     | ACAT2  | ACSM1  | AGPS    |
| CLN6  | PRKCD      | ABCB4      | ACBD3  | ACSM2A | AGRN    |
| CPTP  | SMPD1      | ABCD1      | ACBD5  | ACSM2B | AGT     |
| CREM  | SMPD2      | ABCD2      | ACER1  | ACSM3  | AGTR1   |
| CTSA  | SMPD3      | ABCD3      | ACER2  | ACSM4  | AIG1    |
| ENPP7 | ST3GAL5    | ABCD4      | ACER3  | ACSM5  | AKR1B1  |
| ESYT1 | ST6GALNAC3 | ABCG1      | ACLY   | ACSM6  | AKR1B10 |
| ESYT2 | ST6GALNAC4 | ABHD1      | ACOT1  | ACSS1  | AKR1B15 |
| ESYT3 | ST6GALNAC5 | ABHD15     | ACOT11 | ACSS2  | AKR1C1  |
| GBA   | ST6GALNAC6 | ABO        | ACOT12 | ADGRF5 | AKR1C2  |
| GBA2  | ST8SIA1    | AC098591.2 | ACOT2  | ADH1A  | AKR1C3  |
| GLA   | ST8SIA2    | ACAA1      | ACOT4  | ADH1B  | AKR1C4  |
| GLB1  | ST8SIA3    | ACAA2      | ACOT6  | ADH1C  | AKR1D1  |
| GLTP  | ST8SIA4    | ACACA      | ACOT7  | ADH4   | AKT1    |

---

## Gene Name

---

|        |         |          |        |         |         |
|--------|---------|----------|--------|---------|---------|
| GM2A   | ST8SIA5 | ACACB    | ACOT8  | ADH5    | AKT2    |
| HEXA   | ST8SIA6 | ACAD10   | ACOX1  | ADH6    | ALAS1   |
| HEXB   | STS     | ACAD11   | ACOX2  | ADH7    | ALDH1A1 |
| ITGB8  | SUMF1   | ACAD8    | ACOX3  | ADIPOQ  | ALDH1A2 |
| KIT    | SUMF2   | ACAD9    | ACOXL  | ADIPOR1 | ALDH1A3 |
| LARGE1 | UGCG    | ACADL    | ACSBG1 | ADIPOR2 | ALDH3A2 |
| NAGA   | AACS    | ACADM    | ACSBG2 | ADM     | ALDH3B1 |
| NEU1   | AASDH   | ACADS    | ACSF2  | ADORA1  | ALDH3B2 |
| NEU2   | ABCA1   | ACADSB   | ACSF3  | ADRA2A  | ALDH8A1 |
| ALG1   | ANXA1   | AWAT1    | CCL21  | CFTR    | CRK     |
| ALG10  | AOAH    | B3GNT5   | CCN1   | CGA     | CRKL    |
| ALG10B | APOC4   | B4GALNT2 | CCR7   | CH25H   | CROT    |
| ALG11  | APOD    | B4GALT4  | CD19   | CHD9    | CRPPA   |
| ALG12  | APOF    | BAAT     | CD36   | CIDEA   | CRTC3   |
| ALG13  | APOL1   | BBS4     | CD74   | CLCN2   | CRYL1   |

---

## Gene Name

---

|         |          |         |         |        |         |
|---------|----------|---------|---------|--------|---------|
| ALG14   | APOL2    | BCL11B  | CD81    | CLN8   | CSNK1G2 |
| ALG2    | APOL4    | BCO1    | CDC42   | CLPS   | CUBN    |
| ALG3    | APOL5    | BCO2    | CDK4    | CLPSL1 | CYB5R1  |
| ALG6    | APOM     | BDH2    | CEACAM1 | CLPSL2 | CYB5R2  |
| ALG8    | APP      | BMP2    | CEBPA   | CLU    | CYB5R3  |
| ALG9    | APPL2    | BMP5    | CEL     | CNBP   | CYGB    |
| ALKBH7  | ARV1     | BMP6    | CERKL   | CNR1   | CYP11A1 |
| ALOX12  | ASAH2    | BRCA1   | CERS1   | COMT   | CYP11B1 |
| ALOX12B | ASAH2B   | BSCL2   | CERS2   | COQ2   | CYP11B2 |
| ALOX15B | ASPG     | BTN2A1  | CERS3   | CPT1B  | CYP17A1 |
| ALOX5   | ASXL3    | C1QTNF2 | CERS4   | CPT1C  | CYP19A1 |
| ALOX5AP | ATP1A1   | CACNA1H | CERS5   | CPT2   | CYP1A1  |
| ALOXE3  | ATP5F1A  | CARM1   | CERS6   | CRABP1 | CYP1A2  |
| AMACR   | ATP5F1B  | CBR1    | CERT1   | CRABP2 | CYP1B1  |
| AMBRA1  | ATP6V1B1 | CBR4    | CES1    | CRAT   | CYP21A2 |

---

---

Gene Name

---

|         |         |         |        |         |         |
|---------|---------|---------|--------|---------|---------|
| ANGPTL3 | ATP8B1  | CCDC3   | CES2   | CREB1   | CYP24A1 |
| ANGPTL4 | AUH     | CCDC71L | CES3   | CREBBP  | CYP26A1 |
| ANGPTL8 | AVP     | CCKBR   | CES4A  | CREBL2  | CYP26B1 |
| ANKRD1  | AVPR1A  | CCL19   | CES5A  | CRH     | CYP26C1 |
| CYP27A1 | CYP46A1 | DHRS13  | EDF1   | ETFB    | FGFR3   |
| CYP27B1 | CYP4A11 | DHRS2   | EDN1   | ETFBKMT | FGFR4   |
| CYP27C1 | CYP4A22 | DHRS3   | EDN2   | ETFDH   | FGR     |
| CYP2A13 | CYP4F11 | DHRS4   | EEF1A2 | F2      | FHL2    |
| CYP2A6  | CYP4F12 | DHRS9   | EGFR   | FAAH2   | FITM1   |
| CYP2A7  | CYP4F2  | DISP3   | EGR1   | FADS1   | FLT1    |
| CYP2B6  | CYP4F22 | DKK3    | EHHADH | FADS2   | FLT3    |
| CYP2C18 | CYP4F3  | DKKL1   | EIF6   | FADS2B  | FMC1    |
| CYP2C19 | CYP4F8  | DLD     | ELOVL1 | FADS3   | FMO5    |
| CYP2C8  | CYP4V2  | DNAJC15 | ELOVL2 | FADS6   | FSHB    |
| CYP2C9  | CYP51A1 | DOLK    | ELOVL3 | FAM135A | FUCA1   |

---

## Gene Name

---

|         |        |        |        |         |           |
|---------|--------|--------|--------|---------|-----------|
| CYP2D6  | CYP7A1 | DOLPP1 | ELOVL4 | FAM135B | FUT2      |
| CYP2D7  | CYP7B1 | DPAGT1 | ELOVL5 | FAM3A   | FUT3      |
| CYP2F1  | CYP8B1 | DPEP1  | ELOVL6 | FAR2    | FUT5      |
| CYP2G1P | DAB2IP | DPEP2  | ELOVL7 | FASN    | FUT6      |
| CYP2J2  | DDX20  | DRD3   | EPHA8  | FAXDC2  | FUT7      |
| CYP2R1  | DECR1  | EBP    | EPHX1  | FDFT1   | G0S2      |
| CYP2S1  | DECR2  | EBPL   | EPHX2  | FDPS    | G6PD      |
| CYP2U1  | DEGS1  | ECH1   | EPHX3  | FDX1    | GAL       |
| CYP2W1  | DEGS2  | ECHDC1 | ERFE   | FDX2    | GAL3ST2   |
| CYP39A1 | DHCR24 | ECHDC2 | ERG28  | FDXR    | GAL3ST3   |
| CYP3A4  | DHCR7  | ECHDC3 | ERLIN1 | FGF1    | GAL3ST4   |
| CYP3A43 | DHDDS  | ECHS1  | ERLIN2 | FGF19   | GATA6     |
| CYP3A5  | DHH    | ECI1   | ESR1   | FGF23   | GBGT1     |
| CYP3A7  | DHRS11 | ECI2   | ETFA   | FGFR1   | GC        |
| GCDH    | GRHL1  | HNF4A  | IDI1   | LGALS13 | MACROH2A1 |

---

---

Gene Name

---

|         |       |          |        |        |         |
|---------|-------|----------|--------|--------|---------|
| GDPD2   | GSTA1 | HPGD     | IDI2   | LGMN   | MALRD1  |
| GDPD4   | GSTM1 | HPGDS    | IFNG   | LHB    | MAPK14  |
| GDPD5   | GSTM2 | HSD11B1  | IGFBP7 | LIAS   | MAPK3   |
| GFI1    | GSTM4 | HSD11B2  | IL1B   | LIMA1  | MBOAT4  |
| GGPS1   | GSTP1 | HSD17B1  | IL1RN  | LIPA   | MBTPS1  |
| GGT1    | GSTZ1 | HSD17B10 | IL4    | LIPJ   | MBTPS2  |
| GGT5    | H6PD  | HSD17B11 | ILVBL  | LIPK   | MCAT    |
| GHSR    | HACD1 | HSD17B12 | INS    | LIPM   | MCEE    |
| GIP     | HACD2 | HSD17B13 | IRS1   | LIPN   | ME1     |
| GLIPR1  | HACD3 | HSD17B14 | IRS2   | LIPT1  | MECR    |
| GLT6D1  | HACD4 | HSD17B2  | ISYNA1 | LONP2  | MED1    |
| GLYATL2 | HACL1 | HSD17B3  | IVD    | LPA    | MGST2   |
| GOLM1   | HADH  | HSD17B4  | JAZF1  | LRAT   | MGST3   |
| GPC1    | HAO1  | HSD17B6  | KBTD2  | LRCOL1 | MID1IP1 |
| GPC2    | HAO2  | HSD17B7  | KDSR   | LRP1   | MIF     |

---

## Gene Name

---

|         |         |         |         |          |          |
|---------|---------|---------|---------|----------|----------|
| GPC3    | HCAR2   | HSD17B8 | KLF4    | LRP10    | MIR138-1 |
| GPC4    | HDAC3   | HSD3B1  | KPNB1   | LRP2     | MIR138-2 |
| GPC5    | HDLBP   | HSD3B2  | LACTB   | LRP5     | MIR182   |
| GPC6    | HELZ2   | HSD3B7  | LAMTOR1 | LRP8     | MIR185   |
| GPER1   | HINT2   | HSPG2   | LBR     | LSR      | MIR204   |
| GPIHBP1 | HMGCL   | HTD2    | LDAH    | LSS      | MIR27A   |
| GPR31   | HMGCLL1 | HTRA2   | LDLRAP1 | LTA4H    | MIR27B   |
| GPS2    | HMGCR   | IAH1    | LEP     | LTC4S    | MIR33A   |
| GPX4    | HMGCS1  | ID2     | LEPR    | LYN      | MIR766   |
| GPX5    | HMGCS2  | IDH1    | LGALS12 | LYPLA1   | MIR96    |
| MLXIPL  | NFYB    | OMA1    | PCCA    | PITPNA   | PLPP4    |
| MLYCD   | NFYC    | OPA3    | PCCB    | PITPNB   | PLPP5    |
| MMAA    | NKX1-1  | OPN1LW  | PDE3A   | PLA2G12B | PLPP6    |
| MMUT    | NKX2-1  | OPN1MW  | PDE3B   | PLA2G2C  | PLPPR1   |
| MORC2   | NOD2    | OPN1MW2 | PDGFRA  | PLAA     | PLPPR2   |

---



## Gene Name

---

|       |        |         |                 |        |          |
|-------|--------|---------|-----------------|--------|----------|
| MPDU1 | NPAS2  | OPN1SW  | PDK1            | PLAGL2 | PLPPR3   |
| MSMO1 | NPC1   | ORMDL1  | PDK2            | PLBD2  | PLPPR4   |
| MT3   | NPC1L1 | ORMDL2  | PDK3            | PLCB2  | PLPPR5   |
| MTOR  | NPC2   | ORMDL3  | PDK4            | PLCB3  | PLTP     |
| MTTP  | NR0B1  | OSBP    | PDP1            | PLCB4  | PM20D1   |
| MVD   | NR0B2  | OSBPL1A | PDP2            | PLCD1  | PMVK     |
| MVK   | NR1D1  | OSBPL2  | PDPR            | PLCD3  | PNLIP    |
| MYO5A | NR1D2  | OSBPL3  | PDSS1           | PLCG1  | PNLIPRP1 |
| NAA40 | NR1I2  | OSBPL6  | PDSS2           | PLCH1  | PNLIPRP3 |
| NAAA  | NR1I3  | OSBPL7  | PDXDC1          | PLCL1  | PON2     |
| NCEH1 | NR4A3  | OSBPL9  | PDXDC2P-NPIP14P | PLCL2  | PON3     |
| NCOA1 | NR5A1  | OXSM    | PECR            | PLCXD1 | POR      |
| NCOA2 | NR5A2  | P2RX1   | PER2            | PLCXD2 | PORCN    |
| NCOA6 | NRBF2  | P2RX7   | PEX11A          | PLCXD3 | PPARA    |
| NCOR1 | NSDHL  | P2RY12  | PEX13           | PLCZ1  | PPARD    |

---

## Gene Name

---

|         |        |          |          |          |          |
|---------|--------|----------|----------|----------|----------|
| NCOR2   | NSMAF  | PAFAH1B2 | PEX2     | PLIN1    | PPARG    |
| NDUFAB1 | NUDT19 | PAFAH1B3 | PEX7     | PLIN2    | PPARGC1A |
| NDUFS6  | NUDT7  | PAFAH2   | PHYH     | PLP1     | PPM1L    |
| NFE2L1  | NUS1   | PAM      | PIAS4    | PLPP1    | PPP2CA   |
| NFKB1   | OC90   | PBX1     | PIBF1    | PLPP2    | PPP2R1A  |
| NFYA    | OLAH   | PC       | PIK3IP1  | PLPP3    | PPP2R5A  |
| PPP4R3B | PTGR2  | REST     | SDC4     | SLC25A17 | SPTSSB   |
| PPT1    | PTGS1  | RETSAT   | SDR16C5  | SLC27A2  | SQLE     |
| PRKAA2  | PTGS2  | RFT1     | SDR42E1  | SLC27A3  | SRC      |
| PRKAB1  | PTK2   | RGL1     | SDR42E2  | SLC27A4  | SRD5A1   |
| PRKAB2  | PTK2B  | RHO      | SEC14L2  | SLC27A6  | SRD5A2   |
| PRKAG1  | PTPRN2 | RLBP1    | SERINC4  | SLC35C1  | SRD5A3   |
| PRKAG2  | QKI    | RORA     | SERPINA3 | SLC45A3  | SREBF2   |
| PRKAG3  | RAB7A  | RORC     | SERPINA6 | SMARCD3  | ST3GAL2  |
| PRKAR2B | RACK1  | RPE65    | SESN2    | SMPDL3B  | ST3GAL4  |

---

## Gene Name

---

|        |         |        |          |        |           |
|--------|---------|--------|----------|--------|-----------|
| PRKCE  | RAN     | RUBCN  | SF1      | SNAI1  | ST3GAL6   |
| PRKD1  | RARRES2 | RUBCNL | SFTPB    | SNAI2  | STAR      |
| PRKD2  | RB1     | RXRA   | SGMS1    | SNX17  | STARD3    |
| PRKD3  | RBL1    | SAMD8  | SGMS2    | SOAT1  | STARD3NL  |
| PRLH   | RBL2    | SC5D   | SGPL1    | SOAT2  | STARD4    |
| PRLR   | RBP1    | SCAP   | SGPP1    | SOD1   | STAT5B    |
| PROCA1 | RBP2    | SCARF1 | SGPP2    | SORBS1 | TNFAIP8L3 |
| PROX1  | RBP3    | SCCPDH | SHH      | SOX9   | TNFRSF1A  |
| PRPF19 | RBP4    | SCD    | SIN3A    | SP1    | TNFRSF21  |
| PRXL2B | RDH10   | SCD5   | SIN3B    | SPHK1  | TPP1      |
| PSAPL1 | RDH11   | SCP2   | SIRT2    | SPHK2  | TPRA1     |
| PTGDS  | RDH12   | SCP2D1 | SIRT3    | SPNS2  | TREX1     |
| PTGES  | RDH13   | SCPEP1 | SIRT4    | SPP1   | UGT2B17   |
| PTGES2 | RDH14   | SCT    | SLC16A1  | SPTLC1 | UGT2B28   |
| PTGES3 | RDH16   | SDC1   | SLC16A11 | SPTLC2 | UGT2B7    |

---

## Gene Name

---

|        |         |        |          |          |          |
|--------|---------|--------|----------|----------|----------|
| PTGIS  | RDH5    | SDC2   | SLC22A13 | SPTLC3   | VAPA     |
| PTGR1  | RDH8    | SDC3   | SLC22A24 | SPTSSA   | VAPB     |
| TBL1X  | TRIB3   | VAV3   | ATG5     | WDR45B   | VAV2     |
| TBXAS1 | TRPV1   | VDR    | ATG7     | WIPI1    | ABHD17C  |
| TECR   | TSPO    | VLDLR  | CLIP3    | WIPI2    | APOL3    |
| TECRL  | TSPOAP1 | WASHC1 | CTSD     | ZDHHC1   | APOL6    |
| TEK    | TTC39B  | WDR81  | GLUL     | ZDHHC11  | APOLD1   |
| TEX2   | TTPA    | WDR91  | GOLGA7   | ZDHHC11B | ATG10    |
| TGFB1  | TTR     | WDTC1  | GOLGA7B  | ZDHHC12  | ATG12    |
| TGS1   | TWIST1  | WNT10B | HHAT     | ZDHHC13  | RAB3GAP1 |
| TH     | TXNRD1  | WNT4   | HHATL    | ZDHHC14  | RAB3GAP2 |
| THEM4  | TYRP1   | XBP1   | IRGM     | ZDHHC15  | RABL3    |
| THNSL2 | TYSND1  | YWHAH  | ITGAV    | ZDHHC16  | SELENOK  |
| THRA   | UCP3    | ZADH2  | ITGB3    | ZDHHC17  | SVIP     |
| TIAM2  | UGT1A1  | ZBTB20 | LYPLAL1  | ZDHHC18  | WDR45    |

---

---

Gene Name

---

|         |         |          |         |         |         |
|---------|---------|----------|---------|---------|---------|
| TIPARP  | UGT1A3  | ZFP69    | MAP6D1  | ZDHHC19 | STRA6   |
| TLCD3B  | UGT1A7  | ZMPSTE24 | NMT1    | ZDHHC2  | STUB1   |
| TM6SF2  | UGT1A8  | ZNF202   | NMT2    | ZDHHC20 | SULT1A1 |
| TM7SF2  | UGT1A9  | ZPBP2    | NOTUM   | ZDHHC21 | SULT1A2 |
| TMEM189 | UGT2B10 | ABHD13   | OLR1    | ZDHHC22 | SULT1A3 |
| TMEM38B | UGT2B11 | ABHD17A  | PPM1A   | ZDHHC23 | SULT1A4 |
| TNF     | UGT2B15 | ABHD17B  | PPM1B   | ZDHHC24 | SULT1B1 |
| SULT1E1 | SULT2A1 | SULT2B1  | ZDHHC3  | ZDHHC4  | ZDHHC5  |
| ZDHHC6  | ZDHHC7  | ZDHHC8   | SULT4A1 | ZDHHC9  |         |

---

Supplementary Table 7 List of DEGs between BRCA and normal samples in the TCGA database

| Symbol        | logFC        | AveExpr     | t            | P.Value   | adj.P.Val | B           |
|---------------|--------------|-------------|--------------|-----------|-----------|-------------|
| FIGF          | -3.332190733 | 0.746338404 | -51.3602268  | 4.80E-302 | 2.80E-297 | 681.4988892 |
| CA4           | -2.715508785 | 0.453125056 | -47.81603713 | 1.95E-277 | 5.71E-273 | 624.9735063 |
| CD300LG       | -3.386163115 | 0.762225675 | -46.31342626 | 8.10E-267 | 1.58E-262 | 600.5829011 |
| ARHGAP20      | -1.483449292 | 0.548577288 | -43.22082639 | 1.19E-244 | 1.74E-240 | 549.6558106 |
| SCARA5        | -3.641982517 | 0.906895831 | -43.05540154 | 1.87E-243 | 2.19E-239 | 546.906134  |
| ABCA10        | -1.436653653 | 0.40625017  | -41.5671108  | 1.21E-232 | 7.88E-229 | 522.0623307 |
| GLYAT         | -2.255345799 | 0.34843704  | -40.48167115 | 1.04E-224 | 5.53E-221 | 503.8320253 |
| LYVE1         | -3.290096739 | 1.061543811 | -39.53691513 | 8.97E-218 | 4.03E-214 | 487.8965629 |
| RP5-965F6.2   | -1.237818361 | 0.299640069 | -39.18734841 | 3.35E-215 | 1.30E-211 | 481.9857678 |
| HSD17B13      | -1.644086362 | 0.278690989 | -38.5976469  | 7.43E-211 | 2.55E-207 | 471.9982826 |
| MIR143HG      | -1.238406469 | 0.284686556 | -38.49786044 | 4.05E-210 | 1.18E-206 | 470.3063388 |
| RP11-175K6.1  | -1.00666889  | 0.311819239 | -38.20618742 | 5.76E-208 | 1.60E-204 | 465.3578463 |
| HEPACAM       | -1.301926704 | 0.196860482 | -37.9358002  | 5.74E-206 | 1.52E-202 | 460.7666764 |
| ASPA          | -1.303598778 | 0.378702413 | -37.90331144 | 9.97E-206 | 2.53E-202 | 460.2147809 |
| FXD1          | -1.557337419 | 0.472617629 | -37.70290315 | 3.02E-204 | 7.36E-201 | 456.8093085 |
| MYOM1         | -1.82993012  | 0.635753782 | -37.69400217 | 3.52E-204 | 8.22E-201 | 456.6580147 |
| SLC2A4        | -2.166316764 | 0.607600953 | -37.54153792 | 4.72E-203 | 1.06E-199 | 454.0659683 |
| ABCA9         | -2.095912769 | 0.724972316 | -37.40224191 | 5.07E-202 | 1.10E-198 | 451.6969175 |
| TMEM132C      | -2.578780423 | 0.639318253 | -37.229547   | 9.63E-201 | 2.01E-197 | 448.7587227 |
| TNXB          | -3.00138509  | 1.111119082 | -36.99105817 | 5.63E-199 | 1.13E-195 | 444.6991874 |
| ACVR1C        | -2.13662758  | 0.455272282 | -36.69329236 | 9.06E-197 | 1.71E-193 | 439.6277032 |
| AQP7P1        | -1.450300691 | 0.239933048 | -36.68168125 | 1.10E-196 | 2.01E-193 | 439.429883  |
| BTNL9         | -3.00344879  | 1.238100421 | -36.56153953 | 8.59E-196 | 1.52E-192 | 437.3827469 |
| PAMR1         | -2.963994393 | 1.436374074 | -36.35887858 | 2.73E-194 | 4.56E-191 | 433.9284982 |
| ITIH5         | -3.059894147 | 1.348392126 | -36.25909664 | 1.50E-193 | 2.44E-190 | 432.2273138 |
| RP11-736K20.4 | -2.160483938 | 0.914305469 | -36.22542805 | 2.67E-193 | 4.12E-190 | 431.6532326 |
| RDH5          | -1.898570563 | 0.520655963 | -36.22529818 | 2.68E-193 | 4.12E-190 | 431.6510182 |

| <b>Symbol</b> | <b>logFC</b> | <b>AveExpr</b> | <b>t</b>     | <b>P.Value</b> | <b>adj.P.Val</b> | <b>B</b>    |
|---------------|--------------|----------------|--------------|----------------|------------------|-------------|
| ADAMTS5       | -2.520789855 | 1.411049525    | -36.16393601 | 7.64E-193      | 1.12E-189        | 430.6046537 |
| MEOX2-AS1     | -1.743725274 | 0.439015945    | -36.11487747 | 1.77E-192      | 2.52E-189        | 429.76802   |
| GPAM          | -3.139190542 | 2.041981547    | -35.22191532 | 7.55E-186      | 9.79E-183        | 414.5298888 |
| PDE2A         | -2.239689998 | 1.207345707    | -35.18401098 | 1.44E-185      | 1.83E-182        | 413.8827276 |
| TRHDE-AS1     | -1.437115685 | 0.213290985    | -35.13245265 | 3.49E-185      | 4.33E-182        | 413.0024105 |
| HIF3A         | -1.192385101 | 0.256646831    | -34.95890112 | 6.79E-184      | 8.09E-181        | 410.038894  |
| RP11-798K3.2  | -1.111489414 | 0.148929704    | -34.94714064 | 8.30E-184      | 9.70E-181        | 409.8380619 |
| AQP7          | -3.191100844 | 0.845439527    | -34.84310198 | 4.93E-183      | 5.64E-180        | 408.0613404 |
| ABCA8         | -2.45927146  | 0.83041542     | -34.7137733  | 4.50E-182      | 5.06E-179        | 405.8525776 |
| IGSF10        | -1.673821513 | 0.565445779    | -34.69394532 | 6.32E-182      | 6.96E-179        | 405.5139288 |
| KLB           | -2.001384159 | 0.514580836    | -34.66969824 | 9.57E-182      | 1.04E-178        | 405.0998005 |
| AQPEP         | -1.362485358 | 0.240414616    | -34.66807223 | 9.84E-182      | 1.04E-178        | 405.0720288 |
| ALDH1L1       | -1.729485227 | 0.35723294     | -34.61040532 | 2.64E-181      | 2.75E-178        | 404.0870877 |
| ATOH8         | -1.730880529 | 0.5805555      | -34.36089791 | 1.89E-179      | 1.90E-176        | 399.8253148 |
| RP11-175K6.2  | -1.524153619 | 0.56257742     | -34.17877163 | 4.26E-178      | 4.01E-175        | 396.7143197 |
| SDPR          | -3.755377718 | 1.86783692     | -33.99694476 | 9.58E-177      | 8.87E-174        | 393.6084175 |
| NPR1          | -2.712291417 | 1.643156047    | -33.98701862 | 1.13E-176      | 1.02E-173        | 393.4388637 |
| DMD           | -2.187520555 | 0.954943375    | -33.97340528 | 1.43E-176      | 1.25E-173        | 393.2063274 |
| LEP           | -4.504432813 | 1.0891401      | -33.967465   | 1.59E-176      | 1.36E-173        | 393.1048587 |
| GPR146        | -1.209835175 | 0.539135448    | -33.93072862 | 2.97E-176      | 2.48E-173        | 392.4773489 |
| KCNIP2        | -3.399896373 | 1.175549799    | -33.87043204 | 8.35E-176      | 6.86E-173        | 391.4474065 |
| RP11-311H10.4 | -1.248621384 | 0.194887571    | -33.50525863 | 4.32E-173      | 3.36E-170        | 385.2102042 |
| TNMD          | -2.308961786 | 0.565053776    | -33.46263337 | 8.96E-173      | 6.88E-170        | 384.4822284 |
| MAP1LC3C      | -1.856460993 | 0.593832469    | -33.45336821 | 1.05E-172      | 7.96E-170        | 384.3239956 |

| <b>Symbol</b> | <b>logFC</b> | <b>AveExpr</b> | <b>t</b>     | <b>P.Value</b> | <b>adj.P.Val</b> | <b>B</b>    |
|---------------|--------------|----------------|--------------|----------------|------------------|-------------|
| ALDH1A2       | -1.279903974 | 0.451273953    | -33.44706498 | 1.17E-172      | 8.75E-170        | 384.216348  |
| ATP1A2        | -2.676230229 | 0.742163733    | -33.01109007 | 2.03E-169      | 1.46E-166        | 376.7719179 |
| FAM13A        | -1.766666952 | 1.367302172    | -32.85358036 | 3.00E-168      | 2.11E-165        | 374.0831241 |
| KLHL29        | -1.321817819 | 0.571817442    | -32.80387476 | 7.02E-168      | 4.82E-165        | 373.2347168 |
| COL6A6        | -1.444163549 | 0.438773246    | -32.65947554 | 8.29E-167      | 5.56E-164        | 370.7703151 |
| MRAP          | -1.998481136 | 0.443384075    | -32.65594897 | 8.80E-167      | 5.84E-164        | 370.7101345 |
| SMYD1         | -1.951266277 | 0.373878538    | -32.61807612 | 1.68E-166      | 1.08E-163        | 370.0638552 |
| C14orf180     | -2.141512949 | 0.429745336    | -32.58843668 | 2.79E-166      | 1.77E-163        | 369.5580985 |
| ACSM5         | -1.670223964 | 0.623776284    | -32.48827242 | 1.55E-165      | 9.51E-163        | 367.8490921 |
| MME           | -3.267135577 | 1.872880247    | -32.45405442 | 2.78E-165      | 1.67E-162        | 367.2653223 |
| RP11-561i11.3 | -1.133060963 | 0.195349544    | -32.42663267 | 4.44E-165      | 2.64E-162        | 366.797521  |
| MAB21L1       | -1.413689717 | 0.572185288    | -32.32533285 | 2.51E-164      | 1.45E-161        | 365.0695764 |
| MAMDC2        | -2.546750408 | 1.30722591     | -32.32192886 | 2.66E-164      | 1.52E-161        | 365.0115171 |
| LRRN4CL       | -2.175092921 | 0.965520527    | -32.29348952 | 4.32E-164      | 2.45E-161        | 364.5264619 |
| FREM1         | -1.37045422  | 0.499723911    | -32.14952566 | 5.05E-163      | 2.84E-160        | 362.0714178 |
| RP11-736K20.5 | -1.832833124 | 0.907587176    | -32.02839468 | 4.00E-162      | 2.22E-159        | 360.0062563 |
| HSPB7         | -2.984525987 | 1.063602763    | -31.98569005 | 8.30E-162      | 4.53E-159        | 359.2783026 |
| NIPSNAP3B     | -1.596279295 | 0.97381071     | -31.89536738 | 3.88E-161      | 2.08E-158        | 357.7388501 |
| GIPC2         | -1.35323504  | 0.601106641    | -31.88417273 | 4.70E-161      | 2.49E-158        | 357.5480698 |
| ADRB2         | -1.765045358 | 0.889721742    | -31.86848292 | 6.14E-161      | 3.23E-158        | 357.2806902 |
| KLF15         | -2.053843296 | 0.855223714    | -31.79581688 | 2.12E-160      | 1.11E-157        | 356.042463  |
| ANKRD53       | -1.001391687 | 0.444828896    | -31.78882336 | 2.39E-160      | 1.24E-157        | 355.9233042 |
| CCL14         | -1.911778545 | 0.68793105     | -31.68046735 | 1.52E-159      | 7.74E-157        | 354.0773264 |
| ABCA6         | -1.31777876  | 0.591839615    | -31.68028464 | 1.53E-159      | 7.74E-157        | 354.0742142 |



| <b>Symbol</b> | <b>logFC</b> | <b>AveExpr</b> | <b>t</b>     | <b>P.Value</b> | <b>adj.P.Val</b> | <b>B</b>    |
|---------------|--------------|----------------|--------------|----------------|------------------|-------------|
| TMEM220       | -1.493291473 | 1.014386534    | -31.52707281 | 2.08E-158      | 1.03E-155        | 351.4648741 |
| MIR143        | -2.40753489  | 0.628769271    | -31.50596287 | 2.99E-158      | 1.47E-155        | 351.1054298 |
| EBF1          | -2.248802667 | 1.56822631     | -31.47793003 | 4.82E-158      | 2.34E-155        | 350.6281373 |
| CRHBP         | -1.100312176 | 0.308578912    | -31.47394671 | 5.16E-158      | 2.49E-155        | 350.5603193 |
| MYOC          | -2.342456756 | 0.32082791     | -31.45846442 | 6.71E-158      | 3.21E-155        | 350.2967324 |
| SLC19A3       | -3.085841549 | 0.917455888    | -31.45511621 | 7.11E-158      | 3.37E-155        | 350.2397303 |
| GPIHBP1       | -2.790714391 | 1.316114473    | -31.41339003 | 1.45E-157      | 6.82E-155        | 349.5293988 |
| SCN4A         | -1.265840481 | 0.390196751    | -31.36659014 | 3.22E-157      | 1.50E-154        | 348.7327877 |
| KLHL31        | -1.533453519 | 0.541310065    | -31.34735195 | 4.47E-157      | 2.07E-154        | 348.405351  |
| CHL1          | -2.000330261 | 0.785294978    | -31.29707085 | 1.05E-156      | 4.84E-154        | 347.5496412 |
| ANGPTL7       | -1.747457532 | 0.340516009    | -31.15406153 | 1.21E-155      | 5.41E-153        | 345.1164951 |
| RP1-28O10.1   | -2.458240238 | 0.756156263    | -31.13648062 | 1.63E-155      | 7.25E-153        | 344.8174446 |
| HPSE2         | -1.38648169  | 0.342850071    | -31.00822072 | 1.45E-154      | 6.26E-152        | 342.636226  |
| LEPR          | -1.965531447 | 1.072610395    | -30.96785168 | 2.88E-154      | 1.24E-151        | 341.9498778 |
| ADCYAP1R1     | -1.233147363 | 0.464408356    | -30.95346794 | 3.68E-154      | 1.57E-151        | 341.7053486 |
| FHL1          | -3.890763356 | 2.783071066    | -30.93090273 | 5.40E-154      | 2.28E-151        | 341.3217537 |
| ADH1C         | -2.476531426 | 0.831837449    | -30.91417011 | 7.18E-154      | 3.02E-151        | 341.0373272 |
| MAGI2-AS3     | -1.375798509 | 0.962104813    | -30.90329257 | 8.64E-154      | 3.60E-151        | 340.8524354 |
| CTD-2023N9.1  | -1.024888153 | 0.209918016    | -30.84675039 | 2.26E-153      | 9.30E-151        | 339.8914601 |
| PCK1          | -2.334962425 | 0.51007756     | -30.79977964 | 5.03E-153      | 2.06E-150        | 339.0932936 |
| TNS1          | -2.699671115 | 3.472242729    | -30.79670191 | 5.30E-153      | 2.15E-150        | 339.0409986 |
| SLC7A10       | -1.970255857 | 0.455384859    | -30.56271751 | 2.84E-151      | 1.13E-148        | 335.0668851 |
| RP11-407P15.2 | -1.249410928 | 0.197574489    | -30.46494301 | 1.50E-150      | 5.88E-148        | 333.4072122 |
| CAV1          | -3.186926174 | 4.286534197    | -30.42679241 | 2.87E-150      | 1.12E-147        | 332.7597882 |

| <b>Symbol</b> | <b>logFC</b> | <b>AveExpr</b> | <b>t</b>     | <b>P.Value</b> | <b>adj.P.Val</b> | <b>B</b>    |
|---------------|--------------|----------------|--------------|----------------|------------------|-------------|
| SLC16A7       | -1.577299039 | 0.670772042    | -30.41547878 | 3.48E-150      | 1.34E-147        | 332.5678113 |
| RP11-172E9.2  | -1.045528225 | 0.182640521    | -30.39949627 | 4.56E-150      | 1.75E-147        | 332.2966237 |
| SYNE3         | -1.669477355 | 0.907793337    | -30.38549153 | 5.79E-150      | 2.21E-147        | 332.0590082 |
| ABCD2         | -1.441741053 | 0.404251088    | -30.38111545 | 6.24E-150      | 2.37E-147        | 331.9847628 |
| AC093110.3    | -1.233660799 | 0.595942793    | -30.26564578 | 4.44E-149      | 1.65E-146        | 330.0261358 |
| ANGPTL1       | -2.099473014 | 0.962512697    | -30.22512007 | 8.84E-149      | 3.27E-146        | 329.3389393 |
| CAV2          | -2.502160116 | 2.378003049    | -30.20454364 | 1.25E-148      | 4.57E-146        | 328.9900664 |
| PPP1R12B      | -1.690574423 | 1.797552731    | -30.17373264 | 2.12E-148      | 7.58E-146        | 328.4677209 |
| GDF10         | -2.013524833 | 0.629981985    | -30.15127816 | 3.10E-148      | 1.10E-145        | 328.0870865 |
| CLEC3B        | -3.352585948 | 2.724398182    | -30.05017553 | 1.72E-147      | 6.07E-145        | 326.3736963 |
| CORO2B        | -1.515609822 | 0.980652174    | -29.97630657 | 6.04E-147      | 2.09E-144        | 325.1222982 |
| SIK2          | -1.970898757 | 2.566139108    | -29.88603498 | 2.79E-146      | 9.49E-144        | 323.5935699 |
| ACACB         | -2.641124997 | 1.662965712    | -29.74889309 | 2.86E-145      | 9.44E-143        | 321.2722801 |
| SGK2          | -1.303880582 | 0.482465636    | -29.7094957  | 5.58E-145      | 1.83E-142        | 320.6057013 |
| RP11-481H12.1 | -1.861702551 | 0.991653796    | -29.67382463 | 1.02E-144      | 3.33E-142        | 320.0022747 |
| CLDN19        | -1.382818272 | 0.341107795    | -29.57370622 | 5.57E-144      | 1.81E-141        | 318.3091743 |
| FAM196B       | -1.536986142 | 0.35894015     | -29.53573495 | 1.06E-143      | 3.42E-141        | 317.6672559 |
| SCN4B         | -2.148512131 | 1.356036805    | -29.46778196 | 3.35E-143      | 1.06E-140        | 316.5187831 |
| PALMD         | -2.419917842 | 2.05772783     | -29.4660017  | 3.45E-143      | 1.09E-140        | 316.4887001 |
| EBF3          | -1.70535409  | 0.987101113    | -29.35310856 | 2.33E-142      | 7.28E-140        | 314.5815717 |
| TMEM246       | -1.033935814 | 0.586139823    | -29.21312169 | 2.49E-141      | 7.65E-139        | 312.2182764 |
| SVEP1         | -2.475724578 | 1.488809555    | -29.20644722 | 2.79E-141      | 8.52E-139        | 312.1056394 |
| LINC01485     | -1.135577685 | 0.270679595    | -29.04370084 | 4.36E-140      | 1.32E-137        | 309.3604199 |
| HCAR2         | -1.998129186 | 0.919042042    | -29.02488875 | 6.00E-140      | 1.79E-137        | 309.0432534 |

| <b>Symbol</b> | <b>logFC</b> | <b>AveExpr</b> | <b>t</b>     | <b>P.Value</b> | <b>adj.P.Val</b> | <b>B</b>    |
|---------------|--------------|----------------|--------------|----------------|------------------|-------------|
| SORBS1        | -2.956322501 | 2.568598244    | -28.90589041 | 4.47E-139      | 1.31E-136        | 307.037749  |
| CHRD1         | -4.101531695 | 2.067940641    | -28.89127041 | 5.72E-139      | 1.67E-136        | 306.7914483 |
| BMX           | -1.30199827  | 0.596316449    | -28.82686748 | 1.70E-138      | 4.93E-136        | 305.7067098 |
| TSHZ2         | -1.958699487 | 1.199341095    | -28.76559956 | 4.77E-138      | 1.38E-135        | 304.6751518 |
| ITGA7         | -2.738966787 | 1.702653946    | -28.71055873 | 1.21E-137      | 3.47E-135        | 303.7487565 |
| DEFB132       | -1.799783034 | 0.431519913    | -28.70622192 | 1.30E-137      | 3.72E-135        | 303.6757762 |
| TUSC5         | -4.152786715 | 1.380385132    | -28.68609941 | 1.82E-137      | 5.19E-135        | 303.337178  |
| CXCL2         | -2.898233287 | 1.247478217    | -28.63666788 | 4.19E-137      | 1.17E-134        | 302.505576  |
| HSPB6         | -4.012104293 | 2.466260206    | -28.54345284 | 2.02E-136      | 5.58E-134        | 300.9380732 |
| NMUR1         | -1.051139498 | 0.319673041    | -28.49645681 | 4.45E-136      | 1.23E-133        | 300.1481319 |
| HLF           | -2.294726049 | 1.132399183    | -28.4568392  | 8.68E-136      | 2.36E-133        | 299.4823933 |
| SPRY2         | -2.400665041 | 2.289970754    | -28.36746574 | 3.90E-135      | 1.06E-132        | 297.9811683 |
| CAPN11        | -1.202019841 | 0.511746591    | -28.33209742 | 7.08E-135      | 1.90E-132        | 297.3873179 |
| MYZAP         | -2.001684381 | 1.10759127     | -28.32543109 | 7.92E-135      | 2.12E-132        | 297.2754023 |
| ADAM33        | -1.861411292 | 0.891641726    | -28.30558515 | 1.11E-134      | 2.95E-132        | 296.9422542 |
| KL            | -1.146494608 | 0.528682224    | -28.27260598 | 1.93E-134      | 5.11E-132        | 296.3887383 |
| HOXA4         | -1.223825009 | 0.616228615    | -28.17967978 | 9.18E-134      | 2.43E-131        | 294.8297345 |
| AC097713.3    | -1.371564637 | 0.253595795    | -28.17926246 | 9.25E-134      | 2.43E-131        | 294.8227354 |
| CDO1          | -2.817091996 | 1.484341137    | -28.16635634 | 1.15E-133      | 2.99E-131        | 294.6062895 |
| SYN2          | -1.494665203 | 0.589840293    | -28.07779903 | 5.08E-133      | 1.30E-130        | 293.1216245 |
| C19orf80      | -1.232198286 | 0.276260874    | -28.05068864 | 8.02E-133      | 2.04E-130        | 292.6672984 |
| AVPR2         | -1.39112173  | 0.598342601    | -28.04910944 | 8.23E-133      | 2.09E-130        | 292.6408364 |
| GPD1          | -4.684917161 | 1.950543629    | -28.03999426 | 9.59E-133      | 2.42E-130        | 292.4881016 |
| AOC3          | -3.331722677 | 3.000928043    | -27.98200831 | 2.54E-132      | 6.33E-130        | 291.516711  |

| <b>Symbol</b> | <b>logFC</b> | <b>AveExpr</b> | <b>t</b>     | <b>P.Value</b> | <b>adj.P.Val</b> | <b>B</b>    |
|---------------|--------------|----------------|--------------|----------------|------------------|-------------|
| LGI4          | -1.286977903 | 0.754559014    | -27.98145562 | 2.56E-132      | 6.37E-130        | 291.5074542 |
| VIT           | -2.128693068 | 0.913542338    | -27.95926595 | 3.72E-132      | 9.16E-130        | 291.1358351 |
| PPARG         | -2.478354616 | 1.712394816    | -27.95261218 | 4.16E-132      | 1.02E-129        | 291.0244132 |
| ITPRIPL1      | -1.26261274  | 0.629641532    | -27.94776826 | 4.51E-132      | 1.10E-129        | 290.9433016 |
| FMO2          | -3.272971898 | 1.8210119      | -27.91844948 | 7.38E-132      | 1.79E-129        | 290.4524177 |
| LPL           | -4.233615571 | 2.95546087     | -27.89460464 | 1.10E-131      | 2.65E-129        | 290.0532597 |
| GRIA4         | -1.021125378 | 0.230410824    | -27.82307673 | 3.65E-131      | 8.74E-129        | 288.8563059 |
| PAFAH1B3      | 2.336953522  | 5.154165202    | 27.79570233  | 5.78E-131      | 1.38E-128        | 288.3983847 |
| GNAL          | -1.225899634 | 0.803900183    | -27.75056257 | 1.23E-130      | 2.92E-128        | 287.6434833 |
| OXTR          | -3.533368679 | 1.705173734    | -27.74588232 | 1.33E-130      | 3.15E-128        | 287.5652267 |
| IGFBP6        | -2.987341975 | 3.04659386     | -27.65489548 | 6.11E-130      | 1.44E-127        | 286.0444142 |
| SPX           | -2.034928934 | 0.45317132     | -27.62441002 | 1.02E-129      | 2.39E-127        | 285.5350923 |
| RP1-193H18.3  | -1.724413966 | 0.346640385    | -27.59989886 | 1.53E-129      | 3.58E-127        | 285.1256687 |
| GSN           | -2.361167165 | 5.377766303    | -27.52693512 | 5.20E-129      | 1.21E-126        | 283.9073673 |
| LDB2          | -1.768083547 | 1.891856865    | -27.52054306 | 5.79E-129      | 1.34E-126        | 283.8006693 |
| F10           | -1.548773405 | 0.940971409    | -27.44604221 | 2.01E-128      | 4.60E-126        | 282.5574718 |
| LIPE          | -3.53710515  | 2.093444696    | -27.44502829 | 2.05E-128      | 4.67E-126        | 282.5405575 |
| PCOLCE2       | -3.207750875 | 1.210527526    | -27.42686335 | 2.77E-128      | 6.30E-126        | 282.2375509 |
| RBMS3         | -1.646131572 | 1.310209187    | -27.42470363 | 2.87E-128      | 6.50E-126        | 282.2015278 |
| AC073850.6    | -1.681298644 | 0.438120272    | -27.39885209 | 4.43E-128      | 9.90E-126        | 281.7703842 |
| CFL2          | -1.403319478 | 1.798936798    | -27.39302308 | 4.88E-128      | 1.09E-125        | 281.6731821 |
| DENND2A       | -1.405960296 | 0.981593386    | -27.36132191 | 8.28E-128      | 1.84E-125        | 281.1446252 |
| PAK3          | -1.042491242 | 0.389510458    | -27.352396   | 9.62E-128      | 2.13E-125        | 280.9958268 |
| TMEM100       | -2.065476924 | 0.805422366    | -27.32475085 | 1.53E-127      | 3.35E-125        | 280.5350383 |

| <b>Symbol</b> | <b>logFC</b> | <b>AveExpr</b> | <b>t</b>     | <b>P.Value</b> | <b>adj.P.Val</b> | <b>B</b>    |
|---------------|--------------|----------------|--------------|----------------|------------------|-------------|
| CIDEC         | -4.625466006 | 1.750185298    | -27.28266103 | 3.08E-127      | 6.74E-125        | 279.8336832 |
| RP11-238F2.1  | -1.043532583 | 0.171695917    | -27.21735726 | 9.16E-127      | 1.98E-124        | 278.7459813 |
| CEP112        | -1.002546824 | 0.901131621    | -27.21305598 | 9.85E-127      | 2.12E-124        | 278.6743593 |
| MIR99AHG      | -1.077950703 | 0.655681355    | -27.17969732 | 1.72E-126      | 3.69E-124        | 278.1189804 |
| LIFR          | -2.328321111 | 1.962692424    | -27.17666564 | 1.81E-126      | 3.86E-124        | 278.0685143 |
| LGALS12       | -2.910989545 | 0.984599286    | -27.15699913 | 2.51E-126      | 5.35E-124        | 277.7411718 |
| FAM180B       | -1.1913674   | 0.294336021    | -27.13017827 | 3.92E-126      | 8.30E-124        | 277.2948339 |
| ZBTB16        | -1.832954947 | 0.630505866    | -27.1014144  | 6.34E-126      | 1.34E-123        | 276.8162724 |
| CIDEA         | -3.322877384 | 1.061010105    | -26.92948486 | 1.11E-124      | 2.29E-122        | 273.9582073 |
| CES1          | -3.364868736 | 1.894895557    | -26.85900343 | 3.59E-124      | 7.30E-122        | 272.7877836 |
| MMP11         | 4.44623266   | 4.861609755    | 26.83026608  | 5.79E-124      | 1.17E-121        | 272.3107749 |
| PDE1C         | -1.210173243 | 0.423563654    | -26.82123027 | 6.73E-124      | 1.35E-121        | 272.1608152 |
| RP4-755D9.1   | -1.596800423 | 0.480303448    | -26.81320241 | 7.69E-124      | 1.54E-121        | 272.0275937 |
| HSPB2         | -1.519514274 | 0.848842807    | -26.80444106 | 8.90E-124      | 1.77E-121        | 271.8822108 |
| PLXNA4        | -1.667303011 | 0.751700983    | -26.75560768 | 2.00E-123      | 3.98E-121        | 271.0720937 |
| AKR1C1        | -2.376668177 | 0.872301795    | -26.65048402 | 1.15E-122      | 2.26E-120        | 269.3293588 |
| RBP4          | -4.382476609 | 2.088692025    | -26.54465495 | 6.65E-122      | 1.29E-119        | 267.5766177 |
| LINC00968     | -1.012180436 | 0.234074066    | -26.53983752 | 7.21E-122      | 1.39E-119        | 267.4968722 |
| MYH11         | -3.289455976 | 2.130238108    | -26.43484791 | 4.11E-121      | 7.81E-119        | 265.7598171 |
| LMOD1         | -2.685653468 | 2.749101144    | -26.37611576 | 1.09E-120      | 2.05E-118        | 264.7888451 |
| DNASE1L3      | -1.281459359 | 0.524229881    | -26.3748922  | 1.11E-120      | 2.09E-118        | 264.7686227 |
| ADH1B         | -4.756246872 | 2.102687288    | -26.37065598 | 1.19E-120      | 2.23E-118        | 264.6986105 |
| C8orf88       | -1.280530912 | 0.816554722    | -26.3319646  | 2.26E-120      | 4.21E-118        | 264.0592886 |
| PLIN4         | -4.925408059 | 2.549194712    | -26.2711062  | 6.18E-120      | 1.15E-117        | 263.0541712 |

| <b>Symbol</b> | <b>logFC</b> | <b>AveExpr</b> | <b>t</b>     | <b>P.Value</b> | <b>adj.P.Val</b> | <b>B</b>    |
|---------------|--------------|----------------|--------------|----------------|------------------|-------------|
| PLIN1         | -4.918877463 | 2.385340999    | -26.26229741 | 7.15E-120      | 1.32E-117        | 262.9087376 |
| SPTBN1        | -1.823542701 | 4.151629025    | -26.24753088 | 9.13E-120      | 1.68E-117        | 262.6649692 |
| GYG2          | -2.97753387  | 2.325287078    | -26.21470846 | 1.57E-119      | 2.86E-117        | 262.123258  |
| GPRASP1       | -1.463418048 | 1.079264612    | -26.21346889 | 1.60E-119      | 2.91E-117        | 262.1028032 |
| RP11-394O4.5  | -2.714195211 | 1.795714762    | -26.1994909  | 2.02E-119      | 3.65E-117        | 261.8721623 |
| CDC14B        | -1.220227821 | 1.166545547    | -26.18625218 | 2.52E-119      | 4.53E-117        | 261.6537489 |
| TMEM255A      | -1.294624197 | 0.811793797    | -26.13598693 | 5.77E-119      | 1.03E-116        | 260.8247305 |
| PFKFB1        | -1.831738847 | 0.799268899    | -26.11840512 | 7.72E-119      | 1.37E-116        | 260.5348542 |
| TIMP4         | -3.460114952 | 1.559552848    | -26.07486183 | 1.58E-118      | 2.80E-116        | 259.8171641 |
| SAMD5         | -1.951778675 | 0.84501488     | -26.06026896 | 2.02E-118      | 3.54E-116        | 259.5767118 |
| GALNT15       | -2.387562763 | 1.506504377    | -26.0480676  | 2.47E-118      | 4.31E-116        | 259.3756926 |
| SHE           | -1.332614531 | 1.047866585    | -25.97119995 | 8.77E-118      | 1.52E-115        | 258.1098616 |
| RNF150        | -1.887615658 | 1.043374331    | -25.93511293 | 1.59E-117      | 2.73E-115        | 257.5159371 |
| CKMT2         | -1.279667469 | 0.689774281    | -25.90550364 | 2.59E-117      | 4.44E-115        | 257.0287896 |
| MLXIPL        | -1.786329046 | 0.699122381    | -25.90359477 | 2.67E-117      | 4.56E-115        | 256.9973891 |
| C2orf40       | -3.093547521 | 1.262437143    | -25.89360029 | 3.15E-117      | 5.37E-115        | 256.8329918 |
| PGM5          | -1.771000596 | 1.002952694    | -25.8516551  | 6.29E-117      | 1.07E-114        | 256.1432308 |
| MEOX2         | -2.265449866 | 1.39711421     | -25.84664952 | 6.83E-117      | 1.15E-114        | 256.0609376 |
| MOCS1         | -1.615670476 | 2.008512852    | -25.73033683 | 4.64E-116      | 7.76E-114        | 254.14995   |
| FAM162B       | -1.144243142 | 0.758540362    | -25.71413645 | 6.06E-116      | 1.01E-113        | 253.8839699 |
| ACADL         | -1.319179297 | 0.341095992    | -25.69890943 | 7.78E-116      | 1.29E-113        | 253.6340128 |
| SLC22A3       | -1.496734811 | 0.65436174     | -25.66134941 | 1.44E-115      | 2.38E-113        | 253.0176273 |
| CKS2          | 2.419277364  | 5.385978297    | 25.62466208  | 2.64E-115      | 4.34E-113        | 252.4158057 |
| PDZD2         | -1.829585951 | 1.350170591    | -25.54289793 | 1.01E-114      | 1.65E-112        | 251.07541   |

| <b>Symbol</b> | <b>logFC</b> | <b>AveExpr</b> | <b>t</b>     | <b>P.Value</b> | <b>adj.P.Val</b> | <b>B</b>    |
|---------------|--------------|----------------|--------------|----------------|------------------|-------------|
| RERGL         | -2.13747807  | 0.827861658    | -25.51943335 | 1.49E-114      | 2.42E-112        | 250.6909681 |
| PRRT4         | -1.223745946 | 0.358820758    | -25.50915175 | 1.76E-114      | 2.85E-112        | 250.5225466 |
| TACR1         | -1.545412404 | 0.672734829    | -25.4663969  | 3.55E-114      | 5.71E-112        | 249.8223927 |
| CACHD1        | -1.876664196 | 1.707178767    | -25.44855707 | 4.75E-114      | 7.60E-112        | 249.5303465 |
| WDR86-AS1     | -1.292870472 | 0.62094774     | -25.36795833 | 1.78E-113      | 2.82E-111        | 248.211641  |
| CD36          | -4.094042144 | 2.663612704    | -25.36246812 | 1.95E-113      | 3.08E-111        | 248.1218575 |
| PYCR1         | 2.218262726  | 4.875971513    | 25.30325917  | 5.14E-113      | 8.07E-111        | 247.1539494 |
| HOXA5         | -2.148756742 | 1.405754542    | -25.28657886 | 6.76E-113      | 1.06E-110        | 246.8813899 |
| LIMS2         | -1.650063364 | 1.696544631    | -25.25436174 | 1.15E-112      | 1.77E-110        | 246.3551045 |
| HOXA6         | -1.174176985 | 0.485183409    | -25.24533159 | 1.33E-112      | 2.04E-110        | 246.207627  |
| MTURN         | -2.15156445  | 2.888083971    | -25.24157718 | 1.41E-112      | 2.16E-110        | 246.1463157 |
| NR3C2         | -1.59358459  | 1.102578142    | -25.22118033 | 1.97E-112      | 3.01E-110        | 245.8132726 |
| PPAP2B        | -1.906166683 | 3.67061244     | -25.1596962  | 5.39E-112      | 8.19E-110        | 244.8098301 |
| PEAR1         | -1.486178329 | 1.268751874    | -25.11690509 | 1.08E-111      | 1.64E-109        | 244.111893  |
| PPP1R1A       | -3.234760834 | 1.609324522    | -25.04283393 | 3.64E-111      | 5.45E-109        | 242.9046072 |
| PDE3B         | -1.725619602 | 0.740059254    | -25.0273082  | 4.69E-111      | 7.00E-109        | 242.6516891 |
| HBB           | -3.789685861 | 2.512627529    | -25.02181019 | 5.13E-111      | 7.64E-109        | 242.5621364 |
| DST           | -2.268982779 | 2.465093436    | -25.01100601 | 6.12E-111      | 9.09E-109        | 242.3861732 |
| BHMT2         | -1.876769264 | 1.109038377    | -25.00355465 | 6.91E-111      | 1.02E-108        | 242.2648293 |
| KCNB1         | -1.308599496 | 0.413668729    | -24.94829659 | 1.70E-110      | 2.51E-108        | 241.3653047 |
| GHR           | -2.446611151 | 1.850541054    | -24.93177227 | 2.23E-110      | 3.28E-108        | 241.0964292 |
| PREX2         | -1.294416205 | 0.858220607    | -24.9011268  | 3.67E-110      | 5.40E-108        | 240.5979254 |
| ANKRD29       | -1.471531442 | 0.831250282    | -24.89466733 | 4.08E-110      | 5.97E-108        | 240.4928745 |
| FAM149A       | -1.062047009 | 0.723617984    | -24.87340367 | 5.77E-110      | 8.42E-108        | 240.1471205 |

| <b>Symbol</b> | <b>logFC</b> | <b>AveExpr</b> | <b>t</b>     | <b>P.Value</b> | <b>adj.P.Val</b> | <b>B</b>    |
|---------------|--------------|----------------|--------------|----------------|------------------|-------------|
| CAT           | -1.743270052 | 4.759958743    | -24.84736914 | 8.81E-110      | 1.28E-107        | 239.7239142 |
| CD34          | -1.883326592 | 3.082436653    | -24.8398107  | 9.97E-110      | 1.44E-107        | 239.6010728 |
| CPED1         | -1.934660594 | 1.303665976    | -24.80296362 | 1.82E-109      | 2.63E-107        | 239.0023922 |
| CXorf36       | -1.700984608 | 2.016465208    | -24.76884024 | 3.17E-109      | 4.54E-107        | 238.4482109 |
| PYGM          | -1.139523662 | 0.356594109    | -24.75568901 | 3.92E-109      | 5.58E-107        | 238.2346914 |
| SH3D19        | -1.767596892 | 3.139243105    | -24.75470763 | 3.98E-109      | 5.66E-107        | 238.2187593 |
| NTRK2         | -2.969244676 | 1.651906549    | -24.75302032 | 4.09E-109      | 5.80E-107        | 238.1913676 |
| SEMA3G        | -2.553354537 | 2.47985367     | -24.74634282 | 4.56E-109      | 6.44E-107        | 238.0829708 |
| FGF2          | -2.213509579 | 1.202537379    | -24.73652599 | 5.35E-109      | 7.53E-107        | 237.9236294 |
| PID1          | -1.835757809 | 1.373693723    | -24.70498081 | 8.94E-109      | 1.26E-106        | 237.4117392 |
| NEK2          | 2.509863322  | 2.801263828    | 24.691271    | 1.12E-108      | 1.56E-106        | 237.189331  |
| ACSS2         | -1.421225844 | 3.245621171    | -24.68324335 | 1.27E-108      | 1.77E-106        | 237.0591199 |
| TCEAL7        | -1.634542609 | 1.31179525     | -24.67629403 | 1.43E-108      | 1.97E-106        | 236.9464104 |
| EEPD1         | -1.360539148 | 1.74417132     | -24.67304712 | 1.50E-108      | 2.07E-106        | 236.893753  |
| CCDC69        | -2.398557426 | 2.402461856    | -24.65637624 | 1.97E-108      | 2.71E-106        | 236.6234235 |
| PQLC2L        | -1.143671773 | 0.47248378     | -24.644141   | 2.40E-108      | 3.30E-106        | 236.4250576 |
| RP11-474O21.5 | -1.311573592 | 0.77197697     | -24.56250402 | 9.05E-108      | 1.23E-105        | 235.1023018 |
| C2orf88       | -1.364875571 | 0.645303473    | -24.55755508 | 9.81E-108      | 1.33E-105        | 235.0221595 |
| SYNM          | -3.550159026 | 2.568791841    | -24.55367335 | 1.04E-107      | 1.42E-105        | 234.959303  |
| JAM2          | -1.801293923 | 1.923068551    | -24.55205458 | 1.07E-107      | 1.45E-105        | 234.9330914 |
| P2RY12        | -1.446543302 | 0.783034973    | -24.50224114 | 2.41E-107      | 3.22E-105        | 234.1267653 |
| GNAI1         | -1.959027116 | 1.961124071    | -24.49939474 | 2.52E-107      | 3.37E-105        | 234.0807067 |
| ENPP2         | -2.56980457  | 2.361595882    | -24.49407722 | 2.75E-107      | 3.66E-105        | 233.9946665 |
| MMRN1         | -2.146382635 | 1.005590042    | -24.47532567 | 3.72E-107      | 4.94E-105        | 233.6913051 |



| <b>Symbol</b> | <b>logFC</b> | <b>AveExpr</b> | <b>t</b>     | <b>P.Value</b> | <b>adj.P.Val</b> | <b>B</b>    |
|---------------|--------------|----------------|--------------|----------------|------------------|-------------|
| RP1-302G2.5   | -1.501955106 | 0.624175327    | -24.44200147 | 6.39E-107      | 8.46E-105        | 233.1523728 |
| SAA2-SAA4     | -3.069013382 | 1.256714376    | -24.41774922 | 9.47E-107      | 1.25E-104        | 232.7603047 |
| PDK4          | -3.599501442 | 3.148088532    | -24.41753033 | 9.50E-107      | 1.25E-104        | 232.7567667 |
| IGF1          | -1.016632427 | 0.489522503    | -24.39916503 | 1.28E-106      | 1.68E-104        | 232.4599533 |
| ASF1B         | 2.261925959  | 3.299550987    | 24.39026344  | 1.48E-106      | 1.93E-104        | 232.3161151 |
| RP11-517I3.2  | -1.186588099 | 0.895499251    | -24.37790593 | 1.80E-106      | 2.35E-104        | 232.1164619 |
| ADIPOQ        | -4.615797793 | 2.019568479    | -24.37733491 | 1.82E-106      | 2.36E-104        | 232.1072371 |
| PHYHIP        | -1.021884886 | 0.503026436    | -24.37394568 | 1.92E-106      | 2.49E-104        | 232.0524854 |
| COL10A1       | 4.274264366  | 4.240325833    | 24.32458266  | 4.28E-106      | 5.49E-104        | 231.2553265 |
| NNAT          | -2.311117573 | 1.133151028    | -24.31573989 | 4.94E-106      | 6.32E-104        | 231.1125812 |
| FHL5          | -1.481692974 | 0.863665305    | -24.31471894 | 5.02E-106      | 6.41E-104        | 231.0961014 |
| UBE2T         | 2.566790277  | 4.050339377    | 24.30035081  | 6.33E-106      | 8.07E-104        | 230.8642018 |
| EBF2          | -1.060743981 | 0.671280274    | -24.26471372 | 1.13E-105      | 1.43E-103        | 230.2892186 |
| FAM126A       | -1.372202284 | 1.180580095    | -24.24992248 | 1.43E-105      | 1.81E-103        | 230.0506525 |
| CREB5         | -1.093447593 | 0.690868803    | -24.24991961 | 1.43E-105      | 1.81E-103        | 230.0506061 |
| EDNRB         | -1.845283056 | 1.635002873    | -24.24466573 | 1.56E-105      | 1.96E-103        | 229.9658785 |
| HBA2          | -2.870659613 | 1.350981307    | -24.22290213 | 2.21E-105      | 2.78E-103        | 229.6149683 |
| HAS3          | -2.037421898 | 1.026107129    | -24.21338601 | 2.58E-105      | 3.22E-103        | 229.4615657 |
| MATN2         | -2.799946339 | 2.314019805    | -24.20163976 | 3.12E-105      | 3.89E-103        | 229.2722404 |
| SLC35G2       | -1.022490094 | 0.817170799    | -24.19199055 | 3.65E-105      | 4.52E-103        | 229.1167379 |
| TMOD1         | -1.478942689 | 0.685654584    | -24.19129824 | 3.69E-105      | 4.56E-103        | 229.1055818 |
| FZD4          | -2.134696366 | 2.85815096     | -24.18678164 | 3.97E-105      | 4.90E-103        | 229.0328019 |
| APCDD1        | -2.067419029 | 2.127463146    | -24.15597383 | 6.53E-105      | 8.01E-103        | 228.53649   |
| CA3           | -2.377954445 | 0.902472939    | -24.14551284 | 7.73E-105      | 9.46E-103        | 228.3680119 |

| <b>Symbol</b> | <b>logFC</b> | <b>AveExpr</b> | <b>t</b>     | <b>P.Value</b> | <b>adj.P.Val</b> | <b>B</b>    |
|---------------|--------------|----------------|--------------|----------------|------------------|-------------|
| TK1           | 2.626072213  | 4.688669314    | 23.96982064  | 1.31E-103      | 1.58E-101        | 225.5420943 |
| RSPO3         | -1.741250035 | 1.095251547    | -23.94786686 | 1.87E-103      | 2.24E-101        | 225.1894704 |
| RELN          | -1.161474321 | 0.358952661    | -23.94625191 | 1.92E-103      | 2.30E-101        | 225.1635352 |
| CLDN11        | -1.933473922 | 1.202275906    | -23.90053514 | 4.00E-103      | 4.76E-101        | 224.4295988 |
| TPM3          | 1.192931027  | 5.82274906     | 23.87304635  | 6.23E-103      | 7.36E-101        | 223.9885255 |
| ANGPT1        | -1.463762236 | 0.716015862    | -23.86278274 | 7.35E-103      | 8.65E-101        | 223.8238849 |
| FAM107A       | -2.432980312 | 1.242404827    | -23.85177488 | 8.77E-103      | 1.03E-100        | 223.6473325 |
| RP11-286B14.1 | -1.715735591 | 0.566710263    | -23.83603519 | 1.13E-102      | 1.32E-100        | 223.3949364 |
| PLAC9         | -2.642169162 | 2.121212034    | -23.8186719  | 1.49E-102      | 1.74E-100        | 223.1165715 |
| INMT          | -1.775305258 | 1.116652957    | -23.81022779 | 1.71E-102      | 1.99E-100        | 222.9812225 |
| CEP68         | -1.038595318 | 2.421013631    | -23.77173568 | 3.17E-102      | 3.67E-100        | 222.3644507 |
| PPP1R14A      | -2.237332847 | 1.580469513    | -23.74853577 | 4.60E-102      | 5.30E-100        | 221.9928784 |
| TCEAL5        | -1.272660567 | 0.449086158    | -23.73952324 | 5.32E-102      | 6.11E-100        | 221.8485668 |
| DDR2          | -2.155707585 | 2.478166923    | -23.73113911 | 6.09E-102      | 6.98E-100        | 221.7143345 |
| ANK2          | -1.279495412 | 0.85868486     | -23.72780793 | 6.42E-102      | 7.35E-100        | 221.6610059 |
| GGTA1P        | -1.609750374 | 1.505866632    | -23.71553174 | 7.82E-102      | 8.93E-100        | 221.4645001 |
| TLN2          | -1.385784106 | 1.783214278    | -23.70845416 | 8.76E-102      | 9.99E-100        | 221.351225  |
| DTX1          | -1.568873844 | 1.234932846    | -23.68585833 | 1.26E-101      | 1.43E-99         | 220.989663  |
| NUSAP1        | 2.411619666  | 3.646625337    | 23.62382325  | 3.40E-101      | 3.86E-99         | 219.9976454 |
| EGFLAM        | -1.373336562 | 1.56569753     | -23.60715676 | 4.44E-101      | 5.03E-99         | 219.7312841 |
| CASQ2         | -1.526148861 | 0.735819152    | -23.54967285 | 1.12E-100      | 1.25E-98         | 218.8130958 |
| CNN1          | -3.079192109 | 2.811429024    | -23.54650442 | 1.17E-100      | 1.32E-98         | 218.7625098 |
| GNG11         | -1.927151196 | 3.156842239    | -23.52948189 | 1.54E-100      | 1.72E-98         | 218.4907753 |
| PLSCR4        | -1.917088643 | 2.511467899    | -23.50517387 | 2.27E-100      | 2.53E-98         | 218.1028623 |

| <b>Symbol</b> | <b>logFC</b> | <b>AveExpr</b> | <b>t</b>     | <b>P.Value</b> | <b>adj.P.Val</b> | <b>B</b>    |
|---------------|--------------|----------------|--------------|----------------|------------------|-------------|
| ROBO4         | -1.486301673 | 1.99591171     | -23.489744   | 2.91E-100      | 3.23E-98         | 217.8567034 |
| SLC50A1       | 1.724602793  | 5.19612635     | 23.35548294  | 2.48E-99       | 2.71E-97         | 215.7172379 |
| UBE2C         | 3.211739494  | 4.231916883    | 23.33655025  | 3.36E-99       | 3.66E-97         | 215.4159002 |
| AC097724.3    | -1.006940987 | 0.617652009    | -23.32832137 | 3.83E-99       | 4.16E-97         | 215.2849549 |
| NMT2          | -1.488118058 | 2.01256815     | -23.30636601 | 5.44E-99       | 5.89E-97         | 214.935664  |
| SRPX          | -2.499318901 | 3.078476215    | -23.23440294 | 1.71E-98       | 1.84E-96         | 213.7916367 |
| FOXO1         | -1.655151551 | 2.571724023    | -23.15977722 | 5.61E-98       | 5.98E-96         | 212.6066547 |
| TTC28         | -1.141891713 | 1.545026279    | -23.15517682 | 6.04E-98       | 6.42E-96         | 212.5336511 |
| F8            | -1.267339409 | 1.592886725    | -23.13475586 | 8.35E-98       | 8.87E-96         | 212.2096561 |
| MRAS          | -2.082774047 | 2.646334645    | -23.12923655 | 9.12E-98       | 9.65E-96         | 212.122106  |
| TPX2          | 2.731846639  | 3.946835407    | 23.10504524  | 1.34E-97       | 1.41E-95         | 211.7384629 |
| TSPAN7        | -2.240484203 | 1.987113938    | -23.10216016 | 1.40E-97       | 1.48E-95         | 211.6927192 |
| TGFBR2        | -2.238686726 | 4.467988321    | -23.08142096 | 1.95E-97       | 2.05E-95         | 211.3639565 |
| MAOA          | -3.067723663 | 2.10638557     | -23.06748017 | 2.43E-97       | 2.55E-95         | 211.1430258 |
| GSTM5         | -1.786230572 | 0.703062401    | -23.06263237 | 2.63E-97       | 2.75E-95         | 211.0662104 |
| KANK1         | -1.656067579 | 2.169781901    | -23.03688034 | 3.96E-97       | 4.13E-95         | 210.658261  |
| KLHL13        | -1.91181802  | 1.065998518    | -23.01340385 | 5.74E-97       | 5.98E-95         | 210.2865083 |
| CCNB1         | 2.104919357  | 4.059648128    | 23.00660804  | 6.40E-97       | 6.65E-95         | 210.1789225 |
| AKAP12        | -2.243656763 | 2.220315979    | -23.00017974 | 7.08E-97       | 7.35E-95         | 210.0771658 |
| RASSF9        | -1.089266471 | 0.676872618    | -22.98514298 | 8.99E-97       | 9.29E-95         | 209.8391835 |
| SLIT3         | -2.087497453 | 2.163493542    | -22.97848065 | 9.99E-97       | 1.03E-94         | 209.7337594 |
| ITSN1         | -1.092021833 | 1.637801285    | -22.94901337 | 1.59E-96       | 1.63E-94         | 209.2676107 |
| FGF1          | -1.848799568 | 1.84054329     | -22.90809853 | 3.05E-96       | 3.11E-94         | 208.6207463 |
| PI16          | -3.485198546 | 1.668168755    | -22.90269097 | 3.32E-96       | 3.39E-94         | 208.5352854 |

| <b>Symbol</b> | <b>logFC</b> | <b>AveExpr</b> | <b>t</b>     | <b>P.Value</b> | <b>adj.P.Val</b> | <b>B</b>    |
|---------------|--------------|----------------|--------------|----------------|------------------|-------------|
| AADAC         | -1.203078405 | 0.24973364     | -22.88752785 | 4.22E-96       | 4.30E-94         | 208.2956889 |
| CCDC3         | -2.224108248 | 2.542169305    | -22.88459864 | 4.43E-96       | 4.49E-94         | 208.2494106 |
| ZWINT         | 2.097877025  | 3.879583833    | 22.86573109  | 5.97E-96       | 6.05E-94         | 207.9513784 |
| RP11-295M3.4  | -2.28227245  | 1.146500944    | -22.84527513 | 8.25E-96       | 8.33E-94         | 207.6283614 |
| AKR1C2        | -2.719707294 | 1.108583707    | -22.8324767  | 1.01E-95       | 1.02E-93         | 207.4263196 |
| ANXA1         | -2.499269982 | 4.89718637     | -22.79514785 | 1.82E-95       | 1.83E-93         | 206.8372769 |
| NATD1         | -1.446794842 | 2.225100404    | -22.76893886 | 2.76E-95       | 2.76E-93         | 206.4239247 |
| SLC35A2       | 1.167090274  | 4.082999623    | 22.76140665  | 3.11E-95       | 3.10E-93         | 206.3051653 |
| GPX3          | -3.266137238 | 4.181722761    | -22.72563368 | 5.47E-95       | 5.43E-93         | 205.7413436 |
| NACC1         | 1.267206805  | 4.454001198    | 22.673334    | 1.25E-94       | 1.24E-92         | 204.9176604 |
| IL33          | -2.783655413 | 1.965383197    | -22.66512972 | 1.42E-94       | 1.41E-92         | 204.7885154 |
| WASF3         | -1.724549782 | 1.566297858    | -22.63561709 | 2.26E-94       | 2.23E-92         | 204.324103  |
| PCDHGB7       | -1.054390679 | 0.846270784    | -22.61643775 | 3.06E-94       | 3.01E-92         | 204.0224223 |
| SYNPO2        | -2.238680378 | 2.043081197    | -22.57467247 | 5.92E-94       | 5.81E-92         | 203.3658229 |
| 1-Mar         | -1.707732014 | 1.548569901    | -22.5541751  | 8.17E-94       | 8.00E-92         | 203.0437541 |
| ACTA2-AS1     | -1.576553467 | 0.905816205    | -22.4915451  | 2.19E-93       | 2.12E-91         | 202.0603824 |
| ACO1          | -1.449637631 | 2.935917816    | -22.44284252 | 4.71E-93       | 4.54E-91         | 201.2964366 |
| TMEM37        | -2.217755268 | 2.369827281    | -22.43477812 | 5.35E-93       | 5.14E-91         | 201.1700022 |
| KIAA0101      | 1.880020632  | 2.322904672    | 22.41305514  | 7.52E-93       | 7.22E-91         | 200.8295174 |
| CLIC5         | -1.169210922 | 0.806343498    | -22.41182999 | 7.67E-93       | 7.35E-91         | 200.8103183 |
| MEOX1         | -2.255905705 | 1.42042568     | -22.40933052 | 7.97E-93       | 7.62E-91         | 200.7711512 |
| LHFP          | -2.058822739 | 3.990646751    | -22.40214378 | 8.93E-93       | 8.52E-91         | 200.658543  |
| CDK1          | 2.256349442  | 3.234237602    | 22.35917711  | 1.75E-92       | 1.66E-90         | 199.9856041 |
| AC096772.6    | -1.144511348 | 1.974075023    | -22.27123528 | 6.96E-92       | 6.56E-90         | 198.609886  |

| <b>Symbol</b> | <b>logFC</b> | <b>AveExpr</b> | <b>t</b>     | <b>P.Value</b> | <b>adj.P.Val</b> | <b>B</b>    |
|---------------|--------------|----------------|--------------|----------------|------------------|-------------|
| FABP4         | -5.490520445 | 3.963868029    | -22.25982909 | 8.32E-92       | 7.83E-90         | 198.4316133 |
| KCNMB1        | -1.731440984 | 1.101993691    | -22.23686359 | 1.19E-91       | 1.12E-89         | 198.0727865 |
| MYCT1         | -1.558793892 | 2.026779961    | -22.17328581 | 3.23E-91       | 3.00E-89         | 197.0801933 |
| SLC7A3        | -1.116718891 | 0.344737288    | -22.16239332 | 3.83E-91       | 3.56E-89         | 196.9102528 |
| S100B         | -3.46813951  | 2.063081546    | -22.12341418 | 7.04E-91       | 6.52E-89         | 196.3023942 |
| PROS1         | -1.906846865 | 2.49370573     | -22.07623905 | 1.47E-90       | 1.36E-88         | 195.56731   |
| SH3BGRL2      | -1.846813664 | 2.286603598    | -22.05511505 | 2.04E-90       | 1.89E-88         | 195.2383641 |
| XPNPEP2       | -1.051372811 | 0.437382295    | -22.04698625 | 2.32E-90       | 2.14E-88         | 195.1118158 |
| NPY2R         | -1.482414649 | 0.29328972     | -22.04626954 | 2.35E-90       | 2.16E-88         | 195.100659  |
| PPAP2A        | -1.685069248 | 3.943789693    | -22.04020793 | 2.58E-90       | 2.37E-88         | 195.0063063 |
| CLMP          | -2.091661231 | 2.803464833    | -21.98175908 | 6.42E-90       | 5.88E-88         | 194.0970639 |
| MCAM          | -1.821646742 | 3.992341922    | -21.96827974 | 7.92E-90       | 7.24E-88         | 193.8875184 |
| RP11-92A5.2   | -1.241579816 | 0.237483746    | -21.96775196 | 7.99E-90       | 7.29E-88         | 193.8793148 |
| EZH1          | -1.195330644 | 2.708213718    | -21.937924   | 1.27E-89       | 1.15E-87         | 193.4158131 |
| LTBP4         | -1.802018004 | 2.799200299    | -21.91196691 | 1.90E-89       | 1.71E-87         | 193.012675  |
| TMTC1         | -1.966167712 | 1.384928355    | -21.87980005 | 3.14E-89       | 2.80E-87         | 192.5133696 |
| FGF14-AS2     | -1.424600718 | 1.113173452    | -21.86323987 | 4.06E-89       | 3.61E-87         | 192.2564363 |
| GABARAPL1     | -1.431010231 | 3.535609617    | -21.82326258 | 7.57E-89       | 6.70E-87         | 191.6365197 |
| RP11-6O2.3    | -1.134775139 | 0.463687873    | -21.81268105 | 8.92E-89       | 7.89E-87         | 191.4725147 |
| CCDC50        | -1.091831723 | 3.037772639    | -21.80176032 | 1.06E-88       | 9.33E-87         | 191.3032876 |
| GOS2          | -3.774856866 | 3.357083753    | -21.80016809 | 1.08E-88       | 9.55E-87         | 191.2786174 |
| LINC00086     | -1.273981012 | 0.726709701    | -21.79462121 | 1.18E-88       | 1.04E-86         | 191.1926795 |
| GIMAP8        | -1.582612874 | 2.065917098    | -21.7845397  | 1.38E-88       | 1.21E-86         | 191.03651   |
| SPC25         | 1.584296843  | 2.096768911    | 21.78055577  | 1.47E-88       | 1.29E-86         | 190.9748046 |

| <b>Symbol</b> | <b>logFC</b> | <b>AveExpr</b> | <b>t</b>     | <b>P.Value</b> | <b>adj.P.Val</b> | <b>B</b>    |
|---------------|--------------|----------------|--------------|----------------|------------------|-------------|
| NAT8L         | -2.164492135 | 1.338022355    | -21.75333219 | 2.24E-88       | 1.96E-86         | 190.5532781 |
| FOXN3         | -1.37389086  | 2.490062998    | -21.75317682 | 2.25E-88       | 1.96E-86         | 190.5508729 |
| ABCB1         | -1.261630274 | 0.878723898    | -21.73897977 | 2.80E-88       | 2.44E-86         | 190.3311366 |
| NDRG2         | -2.427766022 | 3.441700377    | -21.73399112 | 3.03E-88       | 2.64E-86         | 190.2539386 |
| METTL7A       | -1.786077242 | 4.182566912    | -21.70176067 | 4.99E-88       | 4.33E-86         | 189.7553631 |
| GPR116        | -1.644352202 | 2.665737825    | -21.69094334 | 5.90E-88       | 5.11E-86         | 189.5880994 |
| AP000892.6    | -1.256789284 | 0.922936344    | -21.68723222 | 6.25E-88       | 5.40E-86         | 189.530724  |
| WDR86         | -1.28883905  | 0.825754737    | -21.68594352 | 6.37E-88       | 5.50E-86         | 189.5108012 |
| CLDN5         | -2.238690202 | 1.86221617     | -21.65835847 | 9.77E-88       | 8.39E-86         | 189.0844681 |
| KIF4A         | 2.107813024  | 2.437692276    | 21.63842245  | 1.33E-87       | 1.14E-85         | 188.7764964 |
| PTH1R         | -1.23502501  | 0.789183879    | -21.61137655 | 2.02E-87       | 1.73E-85         | 188.3588854 |
| AASS          | -1.232326151 | 1.158133332    | -21.55415087 | 4.90E-87       | 4.18E-85         | 187.4760126 |
| RBMS2         | -1.004543841 | 2.494747549    | -21.54410366 | 5.73E-87       | 4.87E-85         | 187.321109  |
| CMA1          | -1.584990554 | 0.695825351    | -21.52083283 | 8.20E-87       | 6.94E-85         | 186.9624489 |
| ALDH1A1       | -2.467209179 | 3.015212261    | -21.47184182 | 1.75E-86       | 1.48E-84         | 186.2079264 |
| ERG           | -1.281620344 | 1.615862748    | -21.43279471 | 3.19E-86       | 2.69E-84         | 185.6070866 |
| NRG2          | -1.122328427 | 0.449872182    | -21.43120841 | 3.27E-86       | 2.75E-84         | 185.5826874 |
| TXNIP         | -2.120900423 | 7.220527192    | -21.42207978 | 3.77E-86       | 3.16E-84         | 185.4422932 |
| CYP2U1        | -1.019645529 | 1.430205924    | -21.40911971 | 4.60E-86       | 3.85E-84         | 185.2430179 |
| PER1          | -2.020614463 | 2.585563292    | -21.36384781 | 9.24E-86       | 7.72E-84         | 184.5473262 |
| RABIF         | 1.046240646  | 3.405202013    | 21.35815785  | 1.01E-85       | 8.41E-84         | 184.4599343 |
| TBX15         | -1.458627639 | 1.468397477    | -21.35577868 | 1.05E-85       | 8.72E-84         | 184.4233958 |
| POC1A         | 1.414760869  | 2.543715145    | 21.32474789  | 1.69E-85       | 1.40E-83         | 183.9469981 |
| TGFBR3        | -2.737527704 | 2.487278347    | -21.32309767 | 1.73E-85       | 1.44E-83         | 183.9216718 |

| <b>Symbol</b> | <b>logFC</b> | <b>AveExpr</b> | <b>t</b>     | <b>P.Value</b> | <b>adj.P.Val</b> | <b>B</b>    |
|---------------|--------------|----------------|--------------|----------------|------------------|-------------|
| PTTG1         | 2.246707591  | 3.214274651    | 21.31397111  | 1.99E-85       | 1.65E-83         | 183.7816198 |
| CCDC167       | 1.64987687   | 4.563692725    | 21.30397322  | 2.32E-85       | 1.92E-83         | 183.6282268 |
| NRN1          | -2.080396291 | 2.576856905    | -21.29143331 | 2.82E-85       | 2.32E-83         | 183.4358778 |
| MYLK          | -2.111525193 | 2.609159602    | -21.29023207 | 2.87E-85       | 2.36E-83         | 183.4174546 |
| EPAS1         | -1.842881948 | 4.428383263    | -21.28927049 | 2.91E-85       | 2.39E-83         | 183.4027075 |
| LMNB1         | 2.017314271  | 3.832700092    | 21.27937401  | 3.39E-85       | 2.78E-83         | 183.2509479 |
| THSD1         | -1.077733762 | 1.431141877    | -21.27902711 | 3.41E-85       | 2.79E-83         | 183.2456288 |
| ELMOD3        | -1.00266484  | 2.10259496     | -21.24268082 | 5.96E-85       | 4.85E-83         | 182.6885407 |
| TOP2A         | 2.798682726  | 4.017873775    | 21.23436495  | 6.77E-85       | 5.51E-83         | 182.5611404 |
| FERMT2        | -1.598318431 | 2.771844747    | -21.21016451 | 9.82E-85       | 7.95E-83         | 182.1905126 |
| IL11RA        | -1.244290163 | 1.622538852    | -21.18564291 | 1.43E-84       | 1.16E-82         | 181.8151576 |
| ABCC9         | -1.271356037 | 1.040192795    | -21.18347083 | 1.48E-84       | 1.19E-82         | 181.7819186 |
| CDKN1C        | -1.938125927 | 2.558569654    | -21.16237238 | 2.04E-84       | 1.64E-82         | 181.4591314 |
| NR3C1         | -1.59571127  | 2.844889394    | -21.15806977 | 2.18E-84       | 1.75E-82         | 181.3933229 |
| MMRN2         | -1.739029567 | 2.889611611    | -21.15570445 | 2.26E-84       | 1.82E-82         | 181.3571479 |
| PIK3C2G       | -1.632211023 | 0.704642056    | -21.12274828 | 3.75E-84       | 2.99E-82         | 180.853306  |
| MRGPRF        | -1.620069602 | 1.52865268     | -21.11647636 | 4.13E-84       | 3.29E-82         | 180.7574592 |
| PELI2         | -1.259465863 | 1.209883257    | -21.10414526 | 4.99E-84       | 3.97E-82         | 180.5690536 |
| CYYR1         | -1.853442186 | 2.706975504    | -21.09989686 | 5.33E-84       | 4.23E-82         | 180.5041543 |
| FAM83H-AS1    | 1.934188252  | 3.893540282    | 21.09939187  | 5.37E-84       | 4.26E-82         | 180.4964403 |
| SEMA3D        | -1.179199024 | 0.66416675     | -21.07649226 | 7.62E-84       | 6.02E-82         | 180.1467258 |
| EMCN          | -1.662751919 | 2.043228698    | -21.0763602  | 7.64E-84       | 6.02E-82         | 180.1447096 |
| ITM2A         | -2.528159844 | 3.267190159    | -21.0471807  | 1.19E-83       | 9.38E-82         | 179.6993391 |
| HOXA7         | -1.087663616 | 0.517217469    | -21.02007881 | 1.81E-83       | 1.42E-81         | 179.2859283 |

| <b>Symbol</b> | <b>logFC</b> | <b>AveExpr</b> | <b>t</b>     | <b>P.Value</b> | <b>adj.P.Val</b> | <b>B</b>    |
|---------------|--------------|----------------|--------------|----------------|------------------|-------------|
| SOX17         | -1.450570294 | 1.303587335    | -21.01805598 | 1.86E-83       | 1.46E-81         | 179.2550817 |
| CCM2L         | -1.092328651 | 1.240399529    | -20.99558211 | 2.63E-83       | 2.04E-81         | 178.9124635 |
| GYPC          | -1.763439976 | 2.781845021    | -20.98572509 | 3.05E-83       | 2.37E-81         | 178.7622437 |
| MAP7D3        | -1.225375027 | 1.204858571    | -20.95367354 | 4.98E-83       | 3.84E-81         | 178.2740028 |
| TMEM88        | -1.507602007 | 1.520154071    | -20.94541507 | 5.65E-83       | 4.35E-81         | 178.1482562 |
| ADHFE1        | -1.297048281 | 1.183907423    | -20.94462547 | 5.72E-83       | 4.40E-81         | 178.1362347 |
| MMD           | -1.900915158 | 2.797731366    | -20.94327184 | 5.84E-83       | 4.49E-81         | 178.1156264 |
| KLF4          | -2.249159967 | 3.035795951    | -20.92876998 | 7.29E-83       | 5.58E-81         | 177.8948806 |
| SLC25A27      | -1.401108924 | 0.953506054    | -20.92515481 | 7.70E-83       | 5.89E-81         | 177.8398617 |
| ARHGEF15      | -1.432930806 | 1.884782011    | -20.88274673 | 1.47E-82       | 1.12E-80         | 177.1947801 |
| ISM1          | -2.152165498 | 2.231868191    | -20.88019317 | 1.53E-82       | 1.16E-80         | 177.1559562 |
| RNASEH2A      | 1.482615213  | 3.904050625    | 20.87470262  | 1.66E-82       | 1.26E-80         | 177.0724862 |
| BGN           | 2.289780243  | 7.828003166    | 20.86578338  | 1.90E-82       | 1.45E-80         | 176.9369127 |
| FAT4          | -1.01169014  | 0.781823252    | -20.86315215 | 1.98E-82       | 1.50E-80         | 176.8969228 |
| AQP1          | -2.319948486 | 5.160759476    | -20.84514061 | 2.61E-82       | 1.97E-80         | 176.6232421 |
| GPC3          | -3.115646584 | 2.725274827    | -20.83824425 | 2.90E-82       | 2.18E-80         | 176.5184824 |
| LILRB5        | -1.114249893 | 0.600149456    | -20.81032493 | 4.43E-82       | 3.32E-80         | 176.0945337 |
| DTL           | 1.879203147  | 2.505450091    | 20.79636903  | 5.48E-82       | 4.10E-80         | 175.882714  |
| RRM2          | 2.338908918  | 3.086139211    | 20.74782878  | 1.15E-81       | 8.52E-80         | 175.1464901 |
| MAML2         | -1.821246936 | 2.123215274    | -20.74455986 | 1.21E-81       | 8.94E-80         | 175.096938  |
| ESRP1         | 1.775410012  | 4.878920084    | 20.7164403   | 1.85E-81       | 1.37E-79         | 174.6708345 |
| TF            | -2.463524313 | 1.126761764    | -20.69649183 | 2.50E-81       | 1.84E-79         | 174.3687118 |
| ADCY4         | -1.211851029 | 1.20990489     | -20.69142657 | 2.70E-81       | 1.98E-79         | 174.2920192 |
| ANTXR2        | -1.401384936 | 2.259168146    | -20.64719594 | 5.29E-81       | 3.87E-79         | 173.6226971 |



| <b>Symbol</b> | <b>logFC</b> | <b>AveExpr</b> | <b>t</b>     | <b>P.Value</b> | <b>adj.P.Val</b> | <b>B</b>    |
|---------------|--------------|----------------|--------------|----------------|------------------|-------------|
| EGFR          | -2.372555036 | 1.934111274    | -20.63021807 | 6.84E-81       | 4.99E-79         | 173.3659555 |
| FAM49A        | -1.370285121 | 1.777049217    | -20.58909471 | 1.28E-80       | 9.24E-79         | 172.7444906 |
| KIFC1         | 2.150264205  | 3.104353667    | 20.57979545  | 1.47E-80       | 1.06E-78         | 172.6040386 |
| FAM83H        | 1.72421699   | 4.55802917     | 20.56924112  | 1.72E-80       | 1.24E-78         | 172.4446665 |
| EPHB1         | -1.32994163  | 0.663981729    | -20.5608819  | 1.95E-80       | 1.41E-78         | 172.318468  |
| EOGT          | -1.151554959 | 2.275599241    | -20.55545615 | 2.12E-80       | 1.53E-78         | 172.2365686 |
| CRB3          | 1.429063671  | 3.249742764    | 20.53745249  | 2.79E-80       | 2.00E-78         | 171.9648842 |
| CD209         | -1.459952797 | 0.875327551    | -20.52614741 | 3.31E-80       | 2.37E-78         | 171.7943417 |
| CRYAB         | -3.672968073 | 3.69815264     | -20.50771768 | 4.37E-80       | 3.12E-78         | 171.5164151 |
| KIF20A        | 2.111341702  | 2.67158334     | 20.50459416  | 4.58E-80       | 3.27E-78         | 171.4693231 |
| CDKN3         | 1.760240647  | 2.393923554    | 20.49028675  | 5.69E-80       | 4.04E-78         | 171.2536589 |
| ATP6V0B       | 1.251999242  | 5.230936309    | 20.48137224  | 6.51E-80       | 4.62E-78         | 171.1193211 |
| TYRO3         | -1.102362374 | 1.085907445    | -20.47521981 | 7.14E-80       | 5.06E-78         | 171.0266227 |
| ECSCR         | -1.205208808 | 1.366221574    | -20.44715527 | 1.09E-79       | 7.70E-78         | 170.603942  |
| RP11-166D19.1 | -1.301623273 | 1.398865935    | -20.44273101 | 1.17E-79       | 8.22E-78         | 170.5373331 |
| D4S234E       | -1.352907738 | 0.608846646    | -20.4338434  | 1.33E-79       | 9.38E-78         | 170.4035474 |
| IQGAP3        | 2.014927697  | 2.373724592    | 20.42676564  | 1.48E-79       | 1.04E-77         | 170.2970252 |
| JPH2          | -1.51102761  | 0.885878068    | -20.42639927 | 1.49E-79       | 1.05E-77         | 170.2915118 |
| PTRF          | -1.934878593 | 6.055288148    | -20.41238849 | 1.84E-79       | 1.29E-77         | 170.0806991 |
| ECM2          | -2.033012192 | 2.405609903    | -20.39486884 | 2.40E-79       | 1.67E-77         | 169.8171868 |
| ABCA5         | -1.119298839 | 1.27658879     | -20.38017348 | 3.00E-79       | 2.09E-77         | 169.5962372 |
| KLF9          | -1.614211891 | 3.374815751    | -20.37383538 | 3.30E-79       | 2.29E-77         | 169.5009652 |
| PCAT19        | -1.036769791 | 1.1051379      | -20.35924472 | 4.11E-79       | 2.85E-77         | 169.2816974 |
| NOTCH4        | -1.196447696 | 1.833660854    | -20.35379559 | 4.46E-79       | 3.09E-77         | 169.1998272 |

| <b>Symbol</b> | <b>logFC</b> | <b>AveExpr</b> | <b>t</b>     | <b>P.Value</b> | <b>adj.P.Val</b> | <b>B</b>    |
|---------------|--------------|----------------|--------------|----------------|------------------|-------------|
| HOXA3         | -1.091280158 | 0.734362194    | -20.33427942 | 5.98E-79       | 4.13E-77         | 168.9066933 |
| FOSB          | -3.543885872 | 2.720550978    | -20.32938778 | 6.44E-79       | 4.45E-77         | 168.8332415 |
| DGAT2         | -2.49798425  | 2.186903683    | -20.32774775 | 6.60E-79       | 4.55E-77         | 168.8086171 |
| H2AFZ         | 1.365104864  | 6.204176989    | 20.32115125  | 7.29E-79       | 5.02E-77         | 168.7095828 |
| CENPF         | 2.171131648  | 2.977806376    | 20.30752201  | 8.95E-79       | 6.16E-77         | 168.5050136 |
| SAMD4A        | -1.089283714 | 1.219793255    | -20.30108559 | 9.86E-79       | 6.77E-77         | 168.4084283 |
| PAQR4         | 1.891103611  | 3.309721671    | 20.29323114  | 1.11E-78       | 7.61E-77         | 168.290584  |
| CTHRC1        | 2.415327406  | 5.296144713    | 20.26632912  | 1.66E-78       | 1.13E-76         | 167.8871243 |
| SPINT2        | 1.748762206  | 6.517595273    | 20.26545874  | 1.69E-78       | 1.15E-76         | 167.8740752 |
| S1PR1         | -1.927349408 | 3.023108981    | -20.25777105 | 1.89E-78       | 1.29E-76         | 167.7588296 |
| UHRF1         | 1.720138605  | 2.09137904     | 20.24389529  | 2.33E-78       | 1.58E-76         | 167.5508723 |
| TNNT3         | -1.541103231 | 0.593003441    | -20.21209496 | 3.76E-78       | 2.53E-76         | 167.0745359 |
| C10orf128     | -1.286589592 | 1.409741055    | -20.21125398 | 3.81E-78       | 2.56E-76         | 167.0619439 |
| PPP4C         | 1.208017497  | 5.408489566    | 20.18455216  | 5.68E-78       | 3.82E-76         | 166.6622646 |
| PTPN14        | -1.485766235 | 2.018164265    | -20.16531718 | 7.58E-78       | 5.09E-76         | 166.3745088 |
| PKMYT1        | 1.782212366  | 1.965010895    | 20.15745006  | 8.53E-78       | 5.72E-76         | 166.2568546 |
| DPT           | -3.156346176 | 4.079861643    | -20.15452897 | 8.91E-78       | 5.97E-76         | 166.2131749 |
| KIT           | -2.89245036  | 2.479663405    | -20.15407283 | 8.98E-78       | 6.00E-76         | 166.2063544 |
| FAM89A        | -1.79863302  | 1.718232274    | -20.13234658 | 1.24E-77       | 8.29E-76         | 165.8815764 |
| DNAJB4        | -1.221357323 | 2.61338788     | -20.12526618 | 1.38E-77       | 9.19E-76         | 165.7757708 |
| PTPRB         | -1.361231504 | 1.58344936     | -20.10383812 | 1.91E-77       | 1.26E-75         | 165.4556713 |
| SOX7          | -1.257474539 | 1.319827442    | -20.09813886 | 2.08E-77       | 1.37E-75         | 165.3705618 |
| NUP210        | 1.679865157  | 3.868988084    | 20.0947349   | 2.18E-77       | 1.44E-75         | 165.3197346 |
| DAAM2         | -1.42538319  | 1.693602407    | -20.09400539 | 2.21E-77       | 1.45E-75         | 165.3088423 |

| <b>Symbol</b> | <b>logFC</b> | <b>AveExpr</b> | <b>t</b>     | <b>P.Value</b> | <b>adj.P.Val</b> | <b>B</b>    |
|---------------|--------------|----------------|--------------|----------------|------------------|-------------|
| CNRIP1        | -1.259467473 | 1.76817858     | -20.07065463 | 3.13E-77       | 2.05E-75         | 164.9602925 |
| AKR1C3        | -2.119772626 | 2.029534831    | -20.05969176 | 3.69E-77       | 2.41E-75         | 164.7967211 |
| BIRC5         | 2.460494877  | 3.157796557    | 20.03574233  | 5.28E-77       | 3.44E-75         | 164.4395356 |
| CCT3          | 1.119598958  | 6.685142017    | 20.02766444  | 5.96E-77       | 3.88E-75         | 164.3191077 |
| GNG2          | -1.439695596 | 1.895073893    | -20.02070246 | 6.61E-77       | 4.29E-75         | 164.2153352 |
| PLAGL1        | -1.383158997 | 1.300909359    | -20.02034086 | 6.65E-77       | 4.31E-75         | 164.2099458 |
| HN1           | 1.868837274  | 4.762494574    | 20.01380364  | 7.33E-77       | 4.75E-75         | 164.1125215 |
| AC093850.2    | 2.562847418  | 2.562801766    | 19.98363545  | 1.15E-76       | 7.42E-75         | 163.6631261 |
| RHOJ          | -1.411114482 | 2.172785666    | -19.97819493 | 1.25E-76       | 8.04E-75         | 163.5821177 |
| ADRBK2        | -1.286812201 | 2.152365075    | -19.96977386 | 1.41E-76       | 9.11E-75         | 163.4567507 |
| CRYBG3        | -1.422654417 | 1.254220063    | -19.94910838 | 1.93E-76       | 1.24E-74         | 163.1492076 |
| TIMM17A       | 1.030402868  | 4.447914332    | 19.93872582  | 2.25E-76       | 1.44E-74         | 162.9947537 |
| RAPGEF3       | -1.211270807 | 1.229885569    | -19.92584702 | 2.72E-76       | 1.74E-74         | 162.8032201 |
| CEP55         | 2.06127482   | 2.60376207     | 19.92579043  | 2.73E-76       | 1.74E-74         | 162.8023786 |
| PBK           | 2.042599408  | 2.52657757     | 19.90719754  | 3.60E-76       | 2.29E-74         | 162.5259728 |
| NPR2          | -1.280422081 | 1.725573133    | -19.90173986 | 3.90E-76       | 2.49E-74         | 162.4448619 |
| AOX1          | -1.904744289 | 1.376318538    | -19.89413081 | 4.37E-76       | 2.78E-74         | 162.3317962 |
| RECK          | -1.39715533  | 1.836518473    | -19.88184711 | 5.25E-76       | 3.32E-74         | 162.1493132 |
| FAXDC2        | -2.067790131 | 1.948982092    | -19.88061841 | 5.35E-76       | 3.38E-74         | 162.131063  |
| RP1-193H18.2  | -1.255123356 | 1.260276915    | -19.86826408 | 6.43E-76       | 4.05E-74         | 161.9475924 |
| TNS2          | -1.543169451 | 3.428617082    | -19.86041318 | 7.22E-76       | 4.55E-74         | 161.8310304 |
| MARCKSL1      | 1.627040161  | 7.575157865    | 19.8581236   | 7.47E-76       | 4.70E-74         | 161.7970414 |
| VWF           | -1.916187689 | 4.101031844    | -19.85398692 | 7.95E-76       | 5.00E-74         | 161.7356369 |
| TMEM178A      | -1.24258135  | 0.822175476    | -19.83357691 | 1.08E-75       | 6.74E-74         | 161.4327653 |

| <b>Symbol</b> | <b>logFC</b> | <b>AveExpr</b> | <b>t</b>     | <b>P.Value</b> | <b>adj.P.Val</b> | <b>B</b>    |
|---------------|--------------|----------------|--------------|----------------|------------------|-------------|
| CBX7          | -1.43858533  | 2.248794335    | -19.80556827 | 1.63E-75       | 1.02E-73         | 161.0173867 |
| RP11-389C8.2  | -1.068031272 | 1.335135116    | -19.80037384 | 1.76E-75       | 1.10E-73         | 160.9403833 |
| INHBA         | 2.22957408   | 2.999249307    | 19.79209451  | 2.00E-75       | 1.24E-73         | 160.8176697 |
| HSD17B6       | 1.289478528  | 1.56197233     | 19.78047523  | 2.37E-75       | 1.47E-73         | 160.6454952 |
| KIF11         | 1.765483888  | 2.880892111    | 19.78003025  | 2.39E-75       | 1.48E-73         | 160.6389026 |
| AP1M2         | 1.849231705  | 5.424089365    | 19.77068924  | 2.74E-75       | 1.69E-73         | 160.5005256 |
| TACC3         | 1.612235125  | 2.786224179    | 19.76351027  | 3.05E-75       | 1.88E-73         | 160.3941991 |
| FAM110D       | -1.437595699 | 1.22588555     | -19.75244642 | 3.60E-75       | 2.21E-73         | 160.2303719 |
| SSPN          | -1.554992727 | 2.40391802     | -19.74514176 | 4.01E-75       | 2.46E-73         | 160.1222339 |
| SAA2          | -2.771597597 | 1.604093868    | -19.74302209 | 4.14E-75       | 2.54E-73         | 160.0908581 |
| AC016995.3    | -1.96293488  | 0.933443999    | -19.72858258 | 5.13E-75       | 3.14E-73         | 159.877166  |
| ADAMTS1       | -2.248734938 | 2.851537656    | -19.72404105 | 5.48E-75       | 3.35E-73         | 159.8099716 |
| RCBTB2        | -1.040429098 | 2.258418932    | -19.70572988 | 7.20E-75       | 4.39E-73         | 159.539126  |
| PLA2R1        | -1.174200015 | 1.587062158    | -19.70252706 | 7.55E-75       | 4.60E-73         | 159.4917651 |
| TWIST2        | -1.672307297 | 1.596089239    | -19.69977583 | 7.86E-75       | 4.79E-73         | 159.4510851 |
| RUSC1         | 1.194382786  | 3.640207978    | 19.6780996   | 1.08E-74       | 6.59E-73         | 159.1306776 |
| PLEKHH2       | -1.127482663 | 0.891777859    | -19.63723552 | 1.99E-74       | 1.21E-72         | 158.5271263 |
| PKD2          | -1.341993532 | 2.582132323    | -19.63491652 | 2.05E-74       | 1.25E-72         | 158.4928942 |
| KANK3         | -1.153657132 | 1.024640399    | -19.61692553 | 2.68E-74       | 1.62E-72         | 158.2273884 |
| COX7A1        | -2.100243552 | 2.762990771    | -19.61651245 | 2.70E-74       | 1.63E-72         | 158.2212936 |
| CDC20         | 2.537563926  | 3.692037181    | 19.61589135  | 2.72E-74       | 1.64E-72         | 158.21213   |
| POLR3K        | 1.276806324  | 3.760799562    | 19.61170513  | 2.90E-74       | 1.75E-72         | 158.1503702 |
| PDGFD         | -1.828689775 | 2.606282003    | -19.58241695 | 4.47E-74       | 2.69E-72         | 157.7184643 |
| DOCK11        | -1.593514385 | 1.941985784    | -19.58175737 | 4.51E-74       | 2.71E-72         | 157.7087414 |

| <b>Symbol</b> | <b>logFC</b> | <b>AveExpr</b> | <b>t</b>     | <b>P.Value</b> | <b>adj.P.Val</b> | <b>B</b>    |
|---------------|--------------|----------------|--------------|----------------|------------------|-------------|
| UGP2          | -1.060210829 | 4.313465111    | -19.57320911 | 5.12E-74       | 3.07E-72         | 157.5827458 |
| CADM3         | -1.515239102 | 0.798242881    | -19.56313485 | 5.94E-74       | 3.55E-72         | 157.4342938 |
| RGN           | -1.305909653 | 0.713305367    | -19.55332218 | 6.87E-74       | 4.10E-72         | 157.2897337 |
| CELF2         | -1.593587831 | 2.013074404    | -19.53291459 | 9.29E-74       | 5.53E-72         | 156.9892072 |
| LARP6         | -1.243060529 | 1.466938899    | -19.53224473 | 9.38E-74       | 5.58E-72         | 156.9793455 |
| EHBP1         | -1.011343093 | 2.581800206    | -19.50423417 | 1.42E-73       | 8.40E-72         | 156.5671226 |
| ALX4          | -1.263120637 | 0.523747076    | -19.502501   | 1.45E-73       | 8.60E-72         | 156.5416259 |
| FAT2          | -1.549543237 | 0.77793067     | -19.48727189 | 1.82E-73       | 1.08E-71         | 156.3176401 |
| TSTA3         | 1.53796665   | 4.805862358    | 19.48499169  | 1.88E-73       | 1.11E-71         | 156.2841112 |
| HMMR          | 1.607084052  | 2.010710702    | 19.48319728  | 1.93E-73       | 1.14E-71         | 156.2577269 |
| MT1M          | -1.898685902 | 1.388025832    | -19.48145006 | 1.98E-73       | 1.17E-71         | 156.2320378 |
| ACSL1         | -2.256901603 | 4.067010585    | -19.46519256 | 2.52E-73       | 1.48E-71         | 155.9930614 |
| DPP3          | 1.254655612  | 3.977800645    | 19.45851223  | 2.78E-73       | 1.63E-71         | 155.8948937 |
| WDR34         | 1.446578508  | 4.972650328    | 19.45117688  | 3.10E-73       | 1.82E-71         | 155.7871203 |
| RHOQ          | -1.196530796 | 3.567708381    | -19.41105478 | 5.60E-73       | 3.27E-71         | 155.1980004 |
| MIR22HG       | -1.211087592 | 2.340103215    | -19.40993228 | 5.69E-73       | 3.32E-71         | 155.1815275 |
| KIF22         | 1.255770323  | 4.043970983    | 19.39051883  | 7.57E-73       | 4.41E-71         | 154.8967084 |
| EDN3          | -1.727721042 | 0.587120787    | -19.38083892 | 8.73E-73       | 5.08E-71         | 154.7547469 |
| AURKA         | 1.998956954  | 2.853178844    | 19.37285061  | 9.82E-73       | 5.71E-71         | 154.637621  |
| CX3CL1        | -2.639323067 | 3.251093524    | -19.32910731 | 1.87E-72       | 1.08E-70         | 153.9966903 |
| RGL1          | -1.385235776 | 2.479716299    | -19.32053748 | 2.12E-72       | 1.23E-70         | 153.8712117 |
| CTXN1         | 2.301037073  | 3.845285475    | 19.31695403  | 2.23E-72       | 1.29E-70         | 153.8187517 |
| CDCA8         | 1.982181334  | 2.938807653    | 19.31655105  | 2.25E-72       | 1.30E-70         | 153.8128526 |
| GPRASP2       | -1.140216889 | 1.928321398    | -19.30003038 | 2.86E-72       | 1.65E-70         | 153.5710655 |

| <b>Symbol</b> | <b>logFC</b> | <b>AveExpr</b> | <b>t</b>     | <b>P.Value</b> | <b>adj.P.Val</b> | <b>B</b>    |
|---------------|--------------|----------------|--------------|----------------|------------------|-------------|
| EHD2          | -1.796198149 | 4.659129023    | -19.28252096 | 3.70E-72       | 2.13E-70         | 153.3149242 |
| MSRB3         | -1.802172281 | 2.893670429    | -19.27233468 | 4.30E-72       | 2.46E-70         | 153.1659667 |
| LSM4          | 1.237813598  | 4.918221229    | 19.26833459  | 4.56E-72       | 2.61E-70         | 153.1074831 |
| CCDC64        | 1.569499817  | 2.190951824    | 19.26787661  | 4.59E-72       | 2.62E-70         | 153.1007876 |
| PRC1          | 1.861917474  | 3.105992113    | 19.24483058  | 6.43E-72       | 3.67E-70         | 152.7639683 |
| HNRNPAB       | 1.0075349    | 6.2874086      | 19.24409765  | 6.50E-72       | 3.71E-70         | 152.7532599 |
| RAB25         | 1.843908863  | 5.911273565    | 19.24236699  | 6.67E-72       | 3.80E-70         | 152.7279752 |
| BMP2          | -1.183534199 | 0.685081862    | -19.24000396 | 6.90E-72       | 3.93E-70         | 152.6934534 |
| COMP          | 3.426312313  | 4.389268144    | 19.17864072  | 1.70E-71       | 9.60E-70         | 151.797763  |
| TMEM63B       | 1.112205184  | 4.129778001    | 19.13257626  | 3.32E-71       | 1.87E-69         | 151.1263614 |
| NDN           | -1.763005348 | 2.935941634    | -19.12384596 | 3.78E-71       | 2.13E-69         | 150.9992099 |
| SLC20A1       | 1.030675564  | 3.851116426    | 19.11562681  | 4.26E-71       | 2.40E-69         | 150.8795309 |
| SAA1          | -4.345671786 | 4.633325907    | -19.10882244 | 4.70E-71       | 2.64E-69         | 150.7804729 |
| SYNPO         | -1.515989474 | 3.125732734    | -19.09424161 | 5.82E-71       | 3.26E-69         | 150.5682673 |
| ANO6          | -1.284992995 | 3.776905454    | -19.09139616 | 6.07E-71       | 3.40E-69         | 150.5268652 |
| SPRY1         | -1.90133795  | 3.308423569    | -19.08488256 | 6.67E-71       | 3.73E-69         | 150.4321028 |
| MIR23A        | -1.458342263 | 0.818638599    | -19.07860557 | 7.31E-71       | 4.07E-69         | 150.3407987 |
| TEK           | -1.441591673 | 1.860866237    | -19.06753354 | 8.59E-71       | 4.78E-69         | 150.1797853 |
| CCNB2         | 1.985787368  | 2.85837583     | 19.05502189  | 1.03E-70       | 5.73E-69         | 149.9978953 |
| RMI2          | 1.684364761  | 2.544317162    | 19.04394101  | 1.21E-70       | 6.71E-69         | 149.8368579 |
| AIFM2         | -1.278343297 | 2.371606302    | -19.04090846 | 1.27E-70       | 7.00E-69         | 149.7927947 |
| CDH13         | -1.005697276 | 1.453147047    | -19.03961097 | 1.29E-70       | 7.13E-69         | 149.7739432 |
| ARID5B        | -1.520090355 | 3.310887465    | -19.03706137 | 1.34E-70       | 7.39E-69         | 149.7369014 |
| PTPN21        | -1.228967791 | 1.826042735    | -19.02908032 | 1.51E-70       | 8.29E-69         | 149.6209662 |

| <b>Symbol</b> | <b>logFC</b> | <b>AveExpr</b> | <b>t</b>     | <b>P.Value</b> | <b>adj.P.Val</b> | <b>B</b>    |
|---------------|--------------|----------------|--------------|----------------|------------------|-------------|
| CENPM         | 1.637500683  | 2.27323636     | 19.02769981  | 1.54E-70       | 8.45E-69         | 149.6009149 |
| FGFBP2        | -1.850637472 | 0.709349471    | -19.02175454 | 1.67E-70       | 9.21E-69         | 149.514572  |
| PLK1          | 1.949352575  | 2.476019194    | 19.01152095  | 1.94E-70       | 1.07E-68         | 149.3659832 |
| CSRNP1        | -1.614813022 | 3.719022009    | -19.00911739 | 2.01E-70       | 1.10E-68         | 149.3310903 |
| TFPI          | -1.43920088  | 1.378075227    | -19.0078175  | 2.05E-70       | 1.12E-68         | 149.3122205 |
| GABRE         | -1.627200655 | 0.80520635     | -18.98998759 | 2.66E-70       | 1.46E-68         | 149.0534627 |
| JTB           | 1.043500741  | 6.75834411     | 18.98467988  | 2.87E-70       | 1.57E-68         | 148.9764589 |
| DLGAP5        | 1.788197938  | 2.195524633    | 18.97861971  | 3.14E-70       | 1.71E-68         | 148.8885524 |
| EPB41L2       | -1.536920834 | 2.836287905    | -18.97697123 | 3.21E-70       | 1.75E-68         | 148.8646427 |
| BMP6          | -1.434639857 | 1.158715057    | -18.97412294 | 3.35E-70       | 1.83E-68         | 148.8233335 |
| STAT5B        | -1.207456583 | 3.714600112    | -18.97072847 | 3.52E-70       | 1.92E-68         | 148.7741073 |
| CFD           | -3.356600902 | 3.934343555    | -18.97023386 | 3.55E-70       | 1.93E-68         | 148.7669349 |
| HADH          | -1.095765098 | 4.676360694    | -18.93915478 | 5.57E-70       | 3.02E-68         | 148.3164525 |
| CENPU         | 1.693723928  | 2.932426333    | 18.91233403  | 8.23E-70       | 4.44E-68         | 147.9280082 |
| LRRN3         | -1.151004016 | 0.608835727    | -18.91182268 | 8.29E-70       | 4.47E-68         | 147.9206052 |
| MAZ           | 1.117175275  | 4.371558259    | 18.87438949  | 1.43E-69       | 7.68E-68         | 147.378958  |
| CD302         | -1.258765737 | 1.636680307    | -18.85685243 | 1.84E-69       | 9.87E-68         | 147.1253985 |
| NUF2          | 1.904556103  | 2.213184922    | 18.85449652  | 1.90E-69       | 1.02E-67         | 147.0913452 |
| DIXDC1        | -1.294353119 | 2.287257598    | -18.83811431 | 2.41E-69       | 1.29E-67         | 146.8546122 |
| SMIM10        | -1.167536547 | 1.656368788    | -18.83330369 | 2.59E-69       | 1.38E-67         | 146.7851168 |
| CNTFR         | -2.45233795  | 1.455061914    | -18.82714352 | 2.83E-69       | 1.51E-67         | 146.6961392 |
| APOA1BP       | 1.206418383  | 5.88463986     | 18.82364037  | 2.98E-69       | 1.59E-67         | 146.6455465 |
| MKI67         | 2.011358686  | 2.727094525    | 18.81821341  | 3.22E-69       | 1.72E-67         | 146.5671801 |
| HJURP         | 1.700404243  | 1.993730453    | 18.81396245  | 3.43E-69       | 1.83E-67         | 146.5058038 |

| <b>Symbol</b> | <b>logFC</b> | <b>AveExpr</b> | <b>t</b>     | <b>P.Value</b> | <b>adj.P.Val</b> | <b>B</b>    |
|---------------|--------------|----------------|--------------|----------------|------------------|-------------|
| AMOTL2        | -1.424464544 | 3.640217137    | -18.80593524 | 3.85E-69       | 2.05E-67         | 146.3899253 |
| EZH2          | 1.495191019  | 2.507534983    | 18.7990648   | 4.25E-69       | 2.26E-67         | 146.2907667 |
| BUB1B         | 1.63892701   | 2.162284177    | 18.79688107  | 4.39E-69       | 2.33E-67         | 146.2592537 |
| TEF           | -1.256817858 | 2.782347555    | -18.79000306 | 4.85E-69       | 2.57E-67         | 146.1600116 |
| MEG3          | -1.266326954 | 1.058521293    | -18.75809927 | 7.69E-69       | 4.06E-67         | 145.6999288 |
| HN1L          | 1.221101942  | 5.600188641    | 18.75115402  | 8.50E-69       | 4.48E-67         | 145.5998275 |
| C10orf54      | -1.530483251 | 2.726620005    | -18.74229561 | 9.66E-69       | 5.08E-67         | 145.4721807 |
| SPC24         | 1.597184994  | 2.017157791    | 18.73908635  | 1.01E-68       | 5.31E-67         | 145.4259443 |
| KPNA2         | 1.831450222  | 5.272598584    | 18.69334785  | 1.96E-68       | 1.02E-66         | 144.7674448 |
| TNFRSF10D     | -1.148966315 | 0.958788266    | -18.69055969 | 2.04E-68       | 1.06E-66         | 144.7273316 |
| MGLL          | -1.952585954 | 3.08357139     | -18.68751061 | 2.13E-68       | 1.11E-66         | 144.6834682 |
| ADAMTSL4      | -1.325198724 | 1.325916723    | -18.68619561 | 2.17E-68       | 1.13E-66         | 144.664552  |
| SOX12         | 1.440113617  | 3.458777472    | 18.66776406  | 2.83E-68       | 1.48E-66         | 144.3994922 |
| LLGL2         | 1.491664632  | 3.553782627    | 18.66454522  | 2.97E-68       | 1.54E-66         | 144.3532173 |
| KIF2C         | 1.989323385  | 2.653287456    | 18.661448    | 3.10E-68       | 1.61E-66         | 144.3086949 |
| CLIP4         | -1.472201974 | 1.588002103    | -18.64585778 | 3.89E-68       | 2.01E-66         | 144.0846469 |
| CDK5          | 1.055562461  | 2.846346595    | 18.63848778  | 4.32E-68       | 2.23E-66         | 143.9787674 |
| CCNF          | 1.182979202  | 2.428303542    | 18.62898683  | 4.96E-68       | 2.56E-66         | 143.8423077 |
| CDC25C        | 1.232886542  | 1.390562142    | 18.62528581  | 5.23E-68       | 2.69E-66         | 143.789161  |
| CDCA5         | 1.893925168  | 2.638971108    | 18.61398194  | 6.15E-68       | 3.17E-66         | 143.626873  |
| ZNF106        | -1.204093836 | 2.997314026    | -18.60913972 | 6.60E-68       | 3.39E-66         | 143.5573701 |
| ARHGEF40      | -1.158402135 | 2.73657728     | -18.53804642 | 1.83E-67       | 9.35E-66         | 142.5380653 |
| FN1           | 2.691945322  | 7.407806762    | 18.52748499  | 2.14E-67       | 1.08E-65         | 142.3868213 |
| SOD3          | -2.444693083 | 2.830868184    | -18.52538921 | 2.20E-67       | 1.12E-65         | 142.3568146 |



| <b>Symbol</b> | <b>logFC</b> | <b>AveExpr</b> | <b>t</b>     | <b>P.Value</b> | <b>adj.P.Val</b> | <b>B</b>    |
|---------------|--------------|----------------|--------------|----------------|------------------|-------------|
| PCDH18        | -1.589016961 | 2.08403535     | -18.51811567 | 2.44E-67       | 1.24E-65         | 142.2526884 |
| BUB1          | 1.705871825  | 2.10633471     | 18.5169303   | 2.48E-67       | 1.26E-65         | 142.235721  |
| PTGFR         | -1.173231521 | 0.613349078    | -18.51009052 | 2.74E-67       | 1.39E-65         | 142.1378282 |
| C10orf10      | -2.252278012 | 4.486007961    | -18.50434166 | 2.98E-67       | 1.50E-65         | 142.0555641 |
| AP1S1         | 1.117323879  | 5.071398288    | 18.48173061  | 4.12E-67       | 2.08E-65         | 141.7321442 |
| TUBA1C        | 1.261791637  | 4.294510848    | 18.47535983  | 4.51E-67       | 2.27E-65         | 141.641058  |
| TP63          | -2.101075798 | 1.361866141    | -18.46912921 | 4.93E-67       | 2.48E-65         | 141.5519924 |
| DLC1          | -1.467397673 | 2.271175017    | -18.46888011 | 4.95E-67       | 2.49E-65         | 141.5484319 |
| HDGF          | 1.114686562  | 6.713797643    | 18.46343793  | 5.35E-67       | 2.69E-65         | 141.470651  |
| H2AFX         | 1.610744566  | 4.404750699    | 18.45180008  | 6.33E-67       | 3.17E-65         | 141.3043621 |
| PCNA          | 1.301524021  | 6.19166503     | 18.40729592  | 1.20E-66       | 5.95E-65         | 140.6689905 |
| ANLN          | 2.015850314  | 2.611741053    | 18.40327065  | 1.27E-66       | 6.30E-65         | 140.6115645 |
| ABLIM1        | -1.48548847  | 3.697496753    | -18.35897038 | 2.39E-66       | 1.18E-64         | 139.9800186 |
| CACNA2D1      | -1.192802182 | 1.223984341    | -18.35649574 | 2.47E-66       | 1.23E-64         | 139.9447649 |
| DPYSL2        | -1.43429521  | 3.708442388    | -18.35051804 | 2.70E-66       | 1.33E-64         | 139.8596172 |
| MEDAG         | -1.869915426 | 1.997585613    | -18.34882021 | 2.76E-66       | 1.36E-64         | 139.8354358 |
| MELK          | 2.009150277  | 2.461602661    | 18.32719799  | 3.76E-66       | 1.85E-64         | 139.5275881 |
| LHX6          | -1.063239779 | 1.019093217    | -18.32539275 | 3.86E-66       | 1.90E-64         | 139.501895  |
| ATP6AP1       | 1.11477689   | 5.827047408    | 18.32316342  | 3.98E-66       | 1.96E-64         | 139.4701678 |
| NRG1          | -1.082583487 | 0.539425668    | -18.31085249 | 4.75E-66       | 2.33E-64         | 139.2950013 |
| NUAK2         | 1.264345713  | 1.941087163    | 18.30718439  | 5.00E-66       | 2.46E-64         | 139.2428222 |
| SPAG5         | 1.718235664  | 2.564030156    | 18.30256146  | 5.35E-66       | 2.62E-64         | 139.1770688 |
| C16orf59      | 1.288160936  | 1.669327275    | 18.29713848  | 5.78E-66       | 2.83E-64         | 139.0999477 |
| KIF23         | 1.512603611  | 2.169426479    | 18.29060237  | 6.34E-66       | 3.10E-64         | 139.0070134 |

| <b>Symbol</b> | <b>logFC</b> | <b>AveExpr</b> | <b>t</b>     | <b>P.Value</b> | <b>adj.P.Val</b> | <b>B</b>    |
|---------------|--------------|----------------|--------------|----------------|------------------|-------------|
| CCNA2         | 1.908495873  | 2.851190316    | 18.27996702  | 7.38E-66       | 3.60E-64         | 138.8558333 |
| SLC52A2       | 1.496341996  | 4.504687903    | 18.27303321  | 8.15E-66       | 3.97E-64         | 138.7572962 |
| LSR           | 1.522690323  | 5.468750456    | 18.25093249  | 1.12E-65       | 5.42E-64         | 138.4433596 |
| CDH5          | -1.454588761 | 3.071522409    | -18.24608253 | 1.20E-65       | 5.79E-64         | 138.3744951 |
| PARP1         | 1.067018062  | 5.261975349    | 18.23047677  | 1.49E-65       | 7.22E-64         | 138.1529782 |
| EZR           | 1.330722089  | 6.790576655    | 18.21567262  | 1.84E-65       | 8.88E-64         | 137.9429373 |
| TMED3         | 1.100414371  | 3.162415727    | 18.20128697  | 2.26E-65       | 1.09E-63         | 137.7389253 |
| C2CD2         | -1.257366234 | 2.426640151    | -18.20022353 | 2.30E-65       | 1.10E-63         | 137.7238475 |
| EGR1          | -2.919457464 | 5.786106906    | -18.1948956  | 2.48E-65       | 1.19E-63         | 137.6483142 |
| FBLN5         | -1.898526648 | 3.330611068    | -18.18185936 | 2.98E-65       | 1.43E-63         | 137.4635529 |
| CRY2          | -1.11331224  | 3.184973427    | -18.15086968 | 4.63E-65       | 2.21E-63         | 137.0246367 |
| GINS1         | 1.492973435  | 2.261141894    | 18.14188596  | 5.26E-65       | 2.50E-63         | 136.8974758 |
| BOC           | -1.595307478 | 1.63742959     | -18.12508365 | 6.68E-65       | 3.16E-63         | 136.659741  |
| MBOAT7        | 1.244433582  | 4.468337763    | 18.12250409  | 6.93E-65       | 3.28E-63         | 136.6232539 |
| WISP1         | 1.823481219  | 2.20707632     | 18.11251244  | 7.99E-65       | 3.77E-63         | 136.4819524 |
| MIR27A        | -1.119908968 | 0.534265645    | -18.1001461  | 9.52E-65       | 4.48E-63         | 136.3071288 |
| PRIMA1        | -1.237970442 | 0.950116587    | -18.09701977 | 9.95E-65       | 4.68E-63         | 136.2629424 |
| AFAP1L1       | -1.066044415 | 1.825355904    | -18.0887487  | 1.12E-64       | 5.26E-63         | 136.1460626 |
| OGN           | -2.792949834 | 2.362060653    | -18.05716992 | 1.75E-64       | 8.20E-63         | 135.7000946 |
| RGCC          | -1.490727004 | 4.254629228    | -18.0541413  | 1.83E-64       | 8.55E-63         | 135.6573463 |
| CRIM1         | -1.806219613 | 4.089268305    | -18.05285994 | 1.86E-64       | 8.70E-63         | 135.6392613 |
| FOXM1         | 2.12091201   | 2.815460525    | 18.05261134  | 1.87E-64       | 8.72E-63         | 135.6357527 |
| TPD52         | 1.782836608  | 4.743052989    | 18.05081973  | 1.92E-64       | 8.94E-63         | 135.6104677 |
| RBP7          | -2.276898733 | 3.526534721    | -18.04810175 | 1.99E-64       | 9.28E-63         | 135.5721115 |

| <b>Symbol</b> | <b>logFC</b> | <b>AveExpr</b> | <b>t</b>     | <b>P.Value</b> | <b>adj.P.Val</b> | <b>B</b>    |
|---------------|--------------|----------------|--------------|----------------|------------------|-------------|
| SLC29A4       | -1.423615649 | 1.152841717    | -18.03294322 | 2.47E-64       | 1.15E-62         | 135.3582532 |
| MMP28         | -1.281439567 | 1.279590798    | -18.02746364 | 2.67E-64       | 1.24E-62         | 135.2809716 |
| TACC1         | -1.739430696 | 2.87894475     | -18.02412677 | 2.79E-64       | 1.30E-62         | 135.2339164 |
| KCTD12        | -1.601530463 | 4.004830226    | -18.01355795 | 3.24E-64       | 1.51E-62         | 135.0849116 |
| EMP1          | -1.756630988 | 4.458712828    | -17.97379955 | 5.69E-64       | 2.64E-62         | 134.5248191 |
| UBE2S         | 1.67695618   | 2.856552052    | 17.92714548  | 1.10E-63       | 5.09E-62         | 133.8684794 |
| TROAP         | 1.625783903  | 1.886709829    | 17.92506735  | 1.13E-63       | 5.24E-62         | 133.8392663 |
| KAT2B         | -1.114554344 | 2.000133364    | -17.92274174 | 1.17E-63       | 5.41E-62         | 133.8065766 |
| TMEM8A        | 1.121642339  | 3.987273529    | 17.92038913  | 1.21E-63       | 5.58E-62         | 133.7735099 |
| UTRN          | -1.447969822 | 3.06270556     | -17.91914425 | 1.23E-63       | 5.68E-62         | 133.7560136 |
| PPP2R1B       | -1.067356327 | 2.669813059    | -17.90946814 | 1.41E-63       | 6.50E-62         | 133.6200439 |
| SLC9A9        | -1.07633285  | 1.420024855    | -17.88920835 | 1.88E-63       | 8.64E-62         | 133.3354865 |
| COL17A1       | -3.026372372 | 2.139401385    | -17.88072506 | 2.12E-63       | 9.72E-62         | 133.2163895 |
| DCTPP1        | 1.148179119  | 4.994857937    | 17.87355314  | 2.34E-63       | 1.07E-61         | 133.1157281 |
| SFRP1         | -4.208031233 | 3.713287293    | -17.87210037 | 2.39E-63       | 1.09E-61         | 133.0953405 |
| SBK1          | 1.680827947  | 2.892409793    | 17.82951933  | 4.35E-63       | 1.98E-61         | 132.4981971 |
| CALCOCO1      | -1.058626006 | 3.256248566    | -17.82095734 | 4.91E-63       | 2.23E-61         | 132.3782247 |
| LOXL4         | -1.806094261 | 1.352554032    | -17.81904577 | 5.04E-63       | 2.29E-61         | 132.3514439 |
| FAM189A2      | -1.980564856 | 1.823976268    | -17.80842505 | 5.85E-63       | 2.66E-61         | 132.202679  |
| STAT5A        | -1.426501914 | 3.336421567    | -17.7975768  | 6.81E-63       | 3.09E-61         | 132.0507797 |
| SNRPB         | 1.168578344  | 6.925126919    | 17.76774695  | 1.04E-62       | 4.69E-61         | 131.6333701 |
| ABI3BP        | -1.736881284 | 1.568465896    | -17.75385786 | 1.26E-62       | 5.69E-61         | 131.439157  |
| IRX6          | -1.178767957 | 0.548862592    | -17.73175219 | 1.72E-62       | 7.72E-61         | 131.1302306 |
| CXCL12        | -2.006757368 | 4.213275047    | -17.72972184 | 1.77E-62       | 7.94E-61         | 131.1018676 |

| <b>Symbol</b> | <b>logFC</b> | <b>AveExpr</b> | <b>t</b>     | <b>P.Value</b> | <b>adj.P.Val</b> | <b>B</b>    |
|---------------|--------------|----------------|--------------|----------------|------------------|-------------|
| RECQL4        | 1.709801853  | 2.61507659     | 17.72869587  | 1.79E-62       | 8.05E-61         | 131.0875359 |
| GJB2          | 2.69872548   | 3.34061425     | 17.70916924  | 2.36E-62       | 1.05E-60         | 130.8148629 |
| LAGE3         | 1.60445191   | 4.665797005    | 17.69741325  | 2.78E-62       | 1.24E-60         | 130.6507839 |
| NCAPH         | 1.60085032   | 2.236745742    | 17.69737354  | 2.78E-62       | 1.24E-60         | 130.6502298 |
| LRIG3         | -1.425287387 | 2.040708351    | -17.69731152 | 2.78E-62       | 1.24E-60         | 130.6493644 |
| C1QTNF6       | 1.469481392  | 2.634523824    | 17.66897231  | 4.14E-62       | 1.84E-60         | 130.2540925 |
| STX11         | -1.298867289 | 1.516924928    | -17.66656327 | 4.28E-62       | 1.90E-60         | 130.2205084 |
| PHLDB1        | -1.040456966 | 2.162473001    | -17.65835625 | 4.80E-62       | 2.13E-60         | 130.1061153 |
| N4BP2L1       | -1.044031163 | 1.781304018    | -17.644671   | 5.81E-62       | 2.56E-60         | 129.9154324 |
| PDLIM3        | -1.660020469 | 2.160721671    | -17.62663963 | 7.47E-62       | 3.28E-60         | 129.664324  |
| SNRPE         | 1.070592946  | 5.513177521    | 17.62245448  | 7.92E-62       | 3.48E-60         | 129.606062  |
| ARL4A         | -1.410819603 | 2.573972329    | -17.59246298 | 1.20E-61       | 5.27E-60         | 129.1887816 |
| VAMP8         | 1.126588817  | 6.921096841    | 17.57678629  | 1.50E-61       | 6.55E-60         | 128.9708317 |
| SNRNP25       | 1.137405591  | 3.639962397    | 17.56822218  | 1.69E-61       | 7.37E-60         | 128.8518144 |
| NEXN          | -1.264255324 | 1.85222307     | -17.56765252 | 1.70E-61       | 7.42E-60         | 128.8438989 |
| COL11A1       | 3.315709726  | 3.478026468    | 17.55475584  | 2.04E-61       | 8.86E-60         | 128.6647378 |
| LRRC15        | 2.783338597  | 3.786599784    | 17.53467214  | 2.70E-61       | 1.17E-59         | 128.3858872 |
| NDC80         | 1.646987199  | 2.087268044    | 17.52869586  | 2.93E-61       | 1.27E-59         | 128.3029459 |
| PLA2G4A       | -1.592170583 | 1.372477241    | -17.52595352 | 3.04E-61       | 1.32E-59         | 128.2648921 |
| RAD51         | 1.320397778  | 1.862474108    | 17.51893435  | 3.36E-61       | 1.45E-59         | 128.1675072 |
| NCAPG         | 1.560723288  | 1.974602478    | 17.48664667  | 5.26E-61       | 2.26E-59         | 127.7198366 |
| PECAM1        | -1.503896572 | 4.443247474    | -17.47565597 | 6.13E-61       | 2.63E-59         | 127.5675602 |
| TINAGL1       | -1.917965899 | 2.857826098    | -17.46972681 | 6.66E-61       | 2.85E-59         | 127.4854348 |
| CYP26B1       | -1.287348911 | 1.038645117    | -17.46366937 | 7.24E-61       | 3.09E-59         | 127.4015494 |

| <b>Symbol</b> | <b>logFC</b> | <b>AveExpr</b> | <b>t</b>     | <b>P.Value</b> | <b>adj.P.Val</b> | <b>B</b>    |
|---------------|--------------|----------------|--------------|----------------|------------------|-------------|
| RETSAT        | -1.285698242 | 4.800012729    | -17.4489574  | 8.88E-61       | 3.78E-59         | 127.1978843 |
| THRB          | -1.34809622  | 1.976164174    | -17.4474168  | 9.07E-61       | 3.86E-59         | 127.1765629 |
| RACGAP1       | 1.434462578  | 3.293264168    | 17.43843664  | 1.03E-60       | 4.37E-59         | 127.052302  |
| TLCD1         | 1.682794525  | 3.058740754    | 17.43657964  | 1.05E-60       | 4.48E-59         | 127.0266108 |
| FLAD1         | 1.027068262  | 3.958718123    | 17.43159959  | 1.13E-60       | 4.79E-59         | 126.957721  |
| MANF          | 1.010144553  | 4.873736984    | 17.41720314  | 1.38E-60       | 5.84E-59         | 126.7586376 |
| SQLE          | 1.906139097  | 4.194710094    | 17.40993457  | 1.53E-60       | 6.45E-59         | 126.6581599 |
| TESC          | -1.359392003 | 1.051191395    | -17.39852704 | 1.79E-60       | 7.53E-59         | 126.5005166 |
| ICAM2         | -1.086012424 | 1.651170004    | -17.39157871 | 1.97E-60       | 8.28E-59         | 126.4045259 |
| PPAPDC1A      | 1.952972717  | 1.96639358     | 17.38644997  | 2.11E-60       | 8.89E-59         | 126.333687  |
| ELTD1         | -1.436004461 | 3.175262355    | -17.37311298 | 2.54E-60       | 1.07E-58         | 126.1495326 |
| SGCG          | -1.575398293 | 0.554003719    | -17.36236611 | 2.95E-60       | 1.24E-58         | 126.0012025 |
| HSPA12A       | -1.117691972 | 1.462161757    | -17.35485938 | 3.28E-60       | 1.37E-58         | 125.8976254 |
| FANCI         | 1.338869034  | 2.613599372    | 17.33120639  | 4.54E-60       | 1.90E-58         | 125.5714371 |
| MYBL2         | 2.625450915  | 3.596061926    | 17.30925968  | 6.16E-60       | 2.56E-58         | 125.2690144 |
| PSENE1        | 1.053465654  | 4.971675835    | 17.30273725  | 6.74E-60       | 2.80E-58         | 125.1791798 |
| CKAP2L        | 1.314852856  | 1.509883386    | 17.29751361  | 7.24E-60       | 3.01E-58         | 125.1072483 |
| SKA3          | 1.462649383  | 1.834451549    | 17.29657679  | 7.33E-60       | 3.04E-58         | 125.0943493 |
| PTPRM         | -1.284302746 | 2.444931433    | -17.2861576  | 8.47E-60       | 3.51E-58         | 124.9509158 |
| OSR1          | -1.753288387 | 1.050413385    | -17.28610667 | 8.48E-60       | 3.51E-58         | 124.9502148 |
| SPARCL1       | -2.003702422 | 6.099714844    | -17.28421427 | 8.70E-60       | 3.60E-58         | 124.9241691 |
| FAM83D        | 2.02412227   | 2.580362948    | 17.26094914  | 1.20E-59       | 4.95E-58         | 124.6041013 |
| KLHL21        | -1.159375321 | 3.081834694    | -17.25777886 | 1.25E-59       | 5.17E-58         | 124.5605063 |
| LAMTOR2       | 1.209893529  | 5.261111933    | 17.23698844  | 1.67E-59       | 6.86E-58         | 124.2747318 |

| <b>Symbol</b> | <b>logFC</b> | <b>AveExpr</b> | <b>t</b>     | <b>P.Value</b> | <b>adj.P.Val</b> | <b>B</b>    |
|---------------|--------------|----------------|--------------|----------------|------------------|-------------|
| ECT2          | 1.443203873  | 3.269882023    | 17.23472426  | 1.72E-59       | 7.07E-58         | 124.2436219 |
| HYAL1         | -1.01660118  | 0.849759114    | -17.23150538 | 1.80E-59       | 7.38E-58         | 124.1993987 |
| HMGGB3        | 1.852761477  | 3.971898512    | 17.22297824  | 2.03E-59       | 8.28E-58         | 124.0822703 |
| KRT8          | 2.133691171  | 7.528255135    | 17.22072561  | 2.09E-59       | 8.54E-58         | 124.051334  |
| KLF11         | -1.089861135 | 2.686029437    | -17.21367282 | 2.30E-59       | 9.40E-58         | 123.9544909 |
| FGF7          | -1.27021378  | 1.232819631    | -17.19022905 | 3.18E-59       | 1.29E-57         | 123.63275   |
| pk            | -1.223180355 | 2.683988931    | -17.18389485 | 3.47E-59       | 1.41E-57         | 123.5458647 |
| OIP5          | 1.181162924  | 1.659597707    | 17.18316922  | 3.51E-59       | 1.42E-57         | 123.5359126 |
| IL17B         | -1.330403787 | 0.618243129    | -17.17950518 | 3.69E-59       | 1.50E-57         | 123.4856635 |
| AMOTL1        | -1.468416681 | 2.396552661    | -17.16067545 | 4.78E-59       | 1.93E-57         | 123.2275309 |
| E2F1          | 1.769338161  | 2.94697294     | 17.14513757  | 5.91E-59       | 2.39E-57         | 123.0146528 |
| DAB2IP        | -1.107631282 | 3.131489494    | -17.1133846  | 9.15E-59       | 3.69E-57         | 122.5799775 |
| FEN1          | 1.305109851  | 3.931853049    | 17.11100246  | 9.45E-59       | 3.81E-57         | 122.5473871 |
| EPCAM         | 1.773729034  | 6.291133681    | 17.11011483  | 9.57E-59       | 3.85E-57         | 122.5352441 |
| AK5           | -1.969547231 | 1.310360921    | -17.08481585 | 1.35E-58       | 5.44E-57         | 122.1893044 |
| COA6          | 1.08475664   | 4.131786746    | 17.08405446  | 1.37E-58       | 5.49E-57         | 122.1788979 |
| P3H4          | 1.259506129  | 3.429707958    | 17.08062008  | 1.43E-58       | 5.75E-57         | 122.1319609 |
| THRSP         | -3.205280023 | 2.636212642    | -17.08007959 | 1.45E-58       | 5.79E-57         | 122.1245747 |
| GIMAP6        | -1.412101932 | 2.618715154    | -17.06654066 | 1.74E-58       | 6.97E-57         | 121.9395994 |
| SLC25A22      | 1.154980639  | 2.915469551    | 17.05698321  | 1.98E-58       | 7.93E-57         | 121.8090743 |
| EPDR1         | -1.480896271 | 2.217349396    | -17.05565253 | 2.02E-58       | 8.07E-57         | 121.7909047 |
| ANGPTL2       | -1.80255588  | 4.127240491    | -17.05377232 | 2.07E-58       | 8.28E-57         | 121.7652332 |
| TMBIM1        | -1.022128063 | 4.797122448    | -17.05250879 | 2.11E-58       | 8.42E-57         | 121.7479827 |
| PPP1CA        | 1.013507585  | 5.914047496    | 17.01389589  | 3.58E-58       | 1.42E-56         | 121.2211808 |

| <b>Symbol</b> | <b>logFC</b> | <b>AveExpr</b> | <b>t</b>     | <b>P.Value</b> | <b>adj.P.Val</b> | <b>B</b>    |
|---------------|--------------|----------------|--------------|----------------|------------------|-------------|
| APOLD1        | -1.566441861 | 2.395952354    | -17.00838483 | 3.86E-58       | 1.53E-56         | 121.1460514 |
| ZEB2          | -1.01120118  | 1.460867874    | -16.98644042 | 5.21E-58       | 2.06E-56         | 120.8470396 |
| LINC01152     | -1.208021168 | 0.500496723    | -16.97830132 | 5.82E-58       | 2.30E-56         | 120.7361965 |
| MTHFD2        | 1.272379477  | 4.288674601    | 16.97607108  | 6.00E-58       | 2.37E-56         | 120.7058293 |
| PENK          | -1.024443796 | 0.292901181    | -16.95157911 | 8.39E-58       | 3.30E-56         | 120.3725034 |
| ALDH2         | -1.809636006 | 3.298832023    | -16.94645675 | 9.00E-58       | 3.54E-56         | 120.3028269 |
| AHNAK         | -1.645706712 | 6.145427289    | -16.92753454 | 1.16E-57       | 4.56E-56         | 120.0455496 |
| SEMA6D        | -1.302086427 | 0.961841118    | -16.92046606 | 1.28E-57       | 5.02E-56         | 119.9494872 |
| MAPK10        | -1.022668724 | 0.779520954    | -16.91597553 | 1.36E-57       | 5.33E-56         | 119.8884725 |
| NME1          | 1.477690641  | 4.084737225    | 16.89111603  | 1.91E-57       | 7.45E-56         | 119.5508732 |
| GBE1          | -1.07714155  | 2.825756125    | -16.88371959 | 2.12E-57       | 8.23E-56         | 119.4504857 |
| GABRD         | 1.172976267  | 1.351495871    | 16.86182619  | 2.85E-57       | 1.10E-55         | 119.1534958 |
| TIMELESS      | 1.145927461  | 3.145774219    | 16.84653111  | 3.51E-57       | 1.36E-55         | 118.9461531 |
| SHANK3        | -1.102258351 | 2.148110267    | -16.84001252 | 3.84E-57       | 1.48E-55         | 118.8578209 |
| ALDOC         | -2.001014152 | 2.480087905    | -16.81540957 | 5.36E-57       | 2.06E-55         | 118.5246183 |
| HSD11B1       | -1.608961674 | 1.359441743    | -16.81514727 | 5.38E-57       | 2.07E-55         | 118.5210675 |
| MRPS34        | 1.241649553  | 5.90010267     | 16.77340779  | 9.48E-57       | 3.62E-55         | 117.9564674 |
| EXO1          | 1.539061282  | 1.821245236    | 16.7589621   | 1.15E-56       | 4.40E-55         | 117.7612638 |
| MET           | -1.789522003 | 2.023953593    | -16.74309727 | 1.43E-56       | 5.44E-55         | 117.5470022 |
| MRPL14        | 1.165495139  | 5.480047614    | 16.74217486  | 1.45E-56       | 5.51E-55         | 117.5345485 |
| VGLL3         | -1.13855499  | 1.188854409    | -16.73875266 | 1.52E-56       | 5.76E-55         | 117.4883481 |
| AURKB         | 1.833283929  | 2.337301948    | 16.73286985  | 1.64E-56       | 6.23E-55         | 117.4089423 |
| TRABD2B       | -1.099755813 | 0.803556997    | -16.730746   | 1.69E-56       | 6.39E-55         | 117.3802789 |
| ID4           | -2.5514048   | 2.821069093    | -16.69734384 | 2.66E-56       | 1.00E-54         | 116.9297789 |

| <b>Symbol</b> | <b>logFC</b> | <b>AveExpr</b> | <b>t</b>     | <b>P.Value</b> | <b>adj.P.Val</b> | <b>B</b>    |
|---------------|--------------|----------------|--------------|----------------|------------------|-------------|
| PYCRL         | 1.347606675  | 3.236951292    | 16.69205351  | 2.86E-56       | 1.08E-54         | 116.8584782 |
| CBX4          | 1.407886472  | 4.097234406    | 16.68931005  | 2.96E-56       | 1.11E-54         | 116.8215086 |
| RASIP1        | -1.233796375 | 1.923996472    | -16.68127919 | 3.30E-56       | 1.24E-54         | 116.7133096 |
| DDX39A        | 1.203968217  | 3.963574427    | 16.65368943  | 4.80E-56       | 1.80E-54         | 116.3418399 |
| ZFP36         | -2.153647501 | 5.920475239    | -16.65249854 | 4.87E-56       | 1.83E-54         | 116.3258143 |
| B4GALT3       | 1.038769325  | 4.297070107    | 16.64946458  | 5.08E-56       | 1.90E-54         | 116.2849898 |
| ESM1          | 1.480606194  | 1.950025637    | 16.63423148  | 6.24E-56       | 2.32E-54         | 116.0800852 |
| FLVCR1        | 1.002305032  | 2.267552747    | 16.63121249  | 6.50E-56       | 2.42E-54         | 116.0394896 |
| PNPLA2        | -1.46128228  | 5.037074437    | -16.62786548 | 6.80E-56       | 2.53E-54         | 115.9944886 |
| CTD-2396E7.11 | 1.383493146  | 3.990888965    | 16.61220409  | 8.40E-56       | 3.11E-54         | 115.7839933 |
| LMO2          | -1.035573508 | 2.408618571    | -16.59977182 | 9.93E-56       | 3.67E-54         | 115.6169859 |
| GTSE1         | 1.376622477  | 1.719613845    | 16.58307762  | 1.24E-55       | 4.60E-54         | 115.392848  |
| HIST1H2BD     | 2.270944472  | 4.970254033    | 16.58233214  | 1.26E-55       | 4.64E-54         | 115.3828425 |
| RPUSD1        | 1.101008785  | 3.396337765    | 16.56215264  | 1.65E-55       | 6.07E-54         | 115.1121045 |
| QKI           | -1.044845337 | 2.548339135    | -16.54341289 | 2.12E-55       | 7.78E-54         | 114.8608659 |
| LINC00961     | -1.16554639  | 0.78339186     | -16.5324331  | 2.46E-55       | 9.01E-54         | 114.7137449 |
| EGR2          | -1.910184526 | 2.515342852    | -16.50981914 | 3.33E-55       | 1.22E-53         | 114.4109257 |
| NFIB          | -2.019727668 | 3.229570924    | -16.50702073 | 3.46E-55       | 1.26E-53         | 114.3734707 |
| MPDZ          | -1.049422813 | 2.144109454    | -16.5025513  | 3.67E-55       | 1.34E-53         | 114.3136582 |
| SLC27A6       | -1.417195729 | 0.776924126    | -16.5021454  | 3.69E-55       | 1.35E-53         | 114.3082267 |
| TLCD2         | -1.005899478 | 1.492725325    | -16.48357652 | 4.74E-55       | 1.72E-53         | 114.059839  |
| WIF1          | -2.200497029 | 0.779256917    | -16.47416704 | 5.38E-55       | 1.95E-53         | 113.9340391 |
| PPP1R16B      | -1.376882933 | 1.401308397    | -16.47078636 | 5.63E-55       | 2.04E-53         | 113.8888519 |
| UNC5B         | 1.475681386  | 3.354791481    | 16.46362231  | 6.20E-55       | 2.24E-53         | 113.7931144 |



| <b>Symbol</b> | <b>logFC</b> | <b>AveExpr</b> | <b>t</b>     | <b>P.Value</b> | <b>adj.P.Val</b> | <b>B</b>    |
|---------------|--------------|----------------|--------------|----------------|------------------|-------------|
| MOB3B         | -1.226073248 | 1.400466112    | -16.44945702 | 7.49E-55       | 2.71E-53         | 113.6038916 |
| ASPM          | 1.465821071  | 1.667253965    | 16.42991572  | 9.74E-55       | 3.51E-53         | 113.3430219 |
| CCL28         | -2.462304838 | 2.287581438    | -16.4249261  | 1.04E-54       | 3.75E-53         | 113.2764431 |
| FAM111B       | 1.75050276   | 2.472115355    | 16.41595818  | 1.17E-54       | 4.22E-53         | 113.1568119 |
| GPR124        | -1.350612091 | 2.551190801    | -16.41035116 | 1.27E-54       | 4.55E-53         | 113.0820355 |
| MT1X          | -2.091346986 | 4.002394572    | -16.39595768 | 1.53E-54       | 5.51E-53         | 112.8901543 |
| ARHGAP39      | 1.173310247  | 2.524286273    | 16.38142609  | 1.86E-54       | 6.67E-53         | 112.6965388 |
| SDS           | 1.397556788  | 2.0134075      | 16.38106775  | 1.87E-54       | 6.70E-53         | 112.6917656 |
| MFAP4         | -2.700786809 | 4.237212948    | -16.37164115 | 2.12E-54       | 7.59E-53         | 112.5662271 |
| PDIA4         | 1.059628691  | 6.174944073    | 16.35660121  | 2.60E-54       | 9.26E-53         | 112.3660267 |
| TRIB3         | 1.407134768  | 3.641427678    | 16.34947563  | 2.86E-54       | 1.02E-52         | 112.2712166 |
| TPRN          | 1.396165226  | 2.845300146    | 16.34744032  | 2.93E-54       | 1.04E-52         | 112.2441404 |
| EFEMP1        | -2.29607431  | 4.338961624    | -16.34039159 | 3.22E-54       | 1.15E-52         | 112.1503857 |
| GPRIN1        | 1.213914592  | 1.543837414    | 16.33908729  | 3.28E-54       | 1.17E-52         | 112.13304   |
| FKBP4         | 1.370816798  | 6.065491617    | 16.31999844  | 4.23E-54       | 1.50E-52         | 111.8792807 |
| F3            | -1.983222765 | 2.921882644    | -16.30554413 | 5.13E-54       | 1.82E-52         | 111.6872551 |
| KIF18B        | 1.384802694  | 1.562513298    | 16.28574435  | 6.68E-54       | 2.36E-52         | 111.4243888 |
| FLNC          | -1.230164958 | 1.235722934    | -16.28558164 | 6.70E-54       | 2.36E-52         | 111.4222295 |
| PAK4          | 1.106820972  | 3.7681664      | 16.2813863   | 7.08E-54       | 2.50E-52         | 111.3665574 |
| P3H2          | -1.207192467 | 1.251699188    | -16.28017834 | 7.20E-54       | 2.53E-52         | 111.3505294 |
| ETS2          | -1.260144102 | 3.651037953    | -16.26047619 | 9.36E-54       | 3.29E-52         | 111.0892153 |
| ARRDC3        | -1.354514246 | 4.192621648    | -16.24861908 | 1.10E-53       | 3.84E-52         | 110.9320479 |
| ZNF204P       | -1.465589625 | 1.642566278    | -16.23587308 | 1.30E-53       | 4.54E-52         | 110.7631789 |
| PGP           | 1.018996617  | 3.005627682    | 16.23264571  | 1.36E-53       | 4.74E-52         | 110.7204335 |

| <b>Symbol</b> | <b>logFC</b> | <b>AveExpr</b> | <b>t</b>     | <b>P.Value</b> | <b>adj.P.Val</b> | <b>B</b>    |
|---------------|--------------|----------------|--------------|----------------|------------------|-------------|
| ACKR1         | -2.873455968 | 2.871476514    | -16.22954815 | 1.41E-53       | 4.93E-52         | 110.6794124 |
| PTGER4        | -1.175015256 | 1.752407079    | -16.22336779 | 1.53E-53       | 5.35E-52         | 110.5975804 |
| ACTG2         | -2.998839024 | 2.711150034    | -16.20383405 | 1.99E-53       | 6.90E-52         | 110.3390708 |
| HCG11         | -1.186477632 | 2.061715905    | -16.19914058 | 2.12E-53       | 7.34E-52         | 110.2769867 |
| NR2F6         | 1.072577265  | 4.559332808    | 16.19557585  | 2.22E-53       | 7.68E-52         | 110.229841  |
| SLC12A8       | 1.015548516  | 2.230140278    | 16.19373994  | 2.27E-53       | 7.87E-52         | 110.2055625 |
| FOS           | -2.833618002 | 5.5623338      | -16.1907797  | 2.36E-53       | 8.18E-52         | 110.1664193 |
| CD200         | -1.157203233 | 2.373628029    | -16.18576678 | 2.53E-53       | 8.71E-52         | 110.1001438 |
| MAD2L1        | 1.293885322  | 2.162618514    | 16.18358258  | 2.60E-53       | 8.96E-52         | 110.0712707 |
| RHPN1         | 1.679572509  | 3.228896538    | 16.18041664  | 2.71E-53       | 9.34E-52         | 110.0294244 |
| AC084357.1    | -1.011302349 | 0.733448397    | -16.16948515 | 3.14E-53       | 1.08E-51         | 109.8849754 |
| CHPF          | 1.257564516  | 5.200034408    | 16.15754382  | 3.67E-53       | 1.26E-51         | 109.7272533 |
| VLDLR         | -1.284792447 | 1.643467593    | -16.15608876 | 3.75E-53       | 1.28E-51         | 109.7080397 |
| TUFT1         | 1.259898192  | 3.898072551    | 16.14424094  | 4.38E-53       | 1.50E-51         | 109.5516346 |
| SPINT1        | 1.346179976  | 5.78839923     | 16.13979738  | 4.65E-53       | 1.59E-51         | 109.4929931 |
| PRELP         | -2.176582879 | 3.061549865    | -16.13840907 | 4.73E-53       | 1.62E-51         | 109.4746738 |
| ZCCHC24       | -1.440608658 | 3.07019413     | -16.1094163  | 6.95E-53       | 2.36E-51         | 109.0923306 |
| CEBPA         | -1.514651935 | 2.792710057    | -16.1075491  | 7.12E-53       | 2.42E-51         | 109.0677219 |
| PITX1         | 2.261859291  | 2.678868513    | 16.09622733  | 8.27E-53       | 2.81E-51         | 108.9185454 |
| FBXL6         | 1.257430866  | 2.955040629    | 16.09374622  | 8.55E-53       | 2.90E-51         | 108.885863  |
| PIK3R1        | -1.539865142 | 3.713705281    | -16.08086809 | 1.01E-52       | 3.43E-51         | 108.7162778 |
| FOXO4         | -1.004273929 | 3.016505071    | -16.08037117 | 1.02E-52       | 3.45E-51         | 108.7097359 |
| DUSP6         | -1.572449555 | 3.61540777     | -16.05252434 | 1.47E-52       | 4.96E-51         | 108.343339  |
| HGH1          | 1.175282741  | 3.957248599    | 16.05138019  | 1.50E-52       | 5.04E-51         | 108.3282935 |

| <b>Symbol</b> | <b>logFC</b> | <b>AveExpr</b> | <b>t</b>     | <b>P.Value</b> | <b>adj.P.Val</b> | <b>B</b>    |
|---------------|--------------|----------------|--------------|----------------|------------------|-------------|
| TLR4          | -1.222744309 | 2.101690452    | -16.02729809 | 2.06E-52       | 6.89E-51         | 108.0117727 |
| FHOD3         | -1.010758384 | 1.145338181    | -16.0135863  | 2.46E-52       | 8.25E-51         | 107.8316889 |
| PFKFB3        | -1.731813669 | 4.38023466     | -15.99709157 | 3.06E-52       | 1.02E-50         | 107.6151861 |
| CACFD1        | 1.233206312  | 3.759563497    | 15.99669949  | 3.08E-52       | 1.03E-50         | 107.6100415 |
| SHCBP1        | 1.234496388  | 1.65909974     | 15.9894662   | 3.39E-52       | 1.13E-50         | 107.515147  |
| TSEN54        | 1.049518325  | 3.507679908    | 15.98694653  | 3.50E-52       | 1.17E-50         | 107.4820976 |
| STXBP2        | 1.187443908  | 3.173750779    | 15.98658675  | 3.52E-52       | 1.17E-50         | 107.4773788 |
| LAMA2         | -1.633479554 | 2.078988023    | -15.98082326 | 3.79E-52       | 1.26E-50         | 107.4017952 |
| MCM2          | 1.405262882  | 3.606247832    | 15.97693844  | 3.99E-52       | 1.33E-50         | 107.3508587 |
| BAX           | 1.005324915  | 3.979137341    | 15.96826124  | 4.48E-52       | 1.48E-50         | 107.2371149 |
| MFAP2         | 1.794893582  | 3.558334382    | 15.96288941  | 4.81E-52       | 1.59E-50         | 107.1667188 |
| TMEM9         | 1.025133101  | 5.157677932    | 15.95982345  | 5.00E-52       | 1.66E-50         | 107.1265473 |
| NCALD         | -1.661938632 | 2.057546009    | -15.95083526 | 5.63E-52       | 1.86E-50         | 107.0088086 |
| SLC25A39      | 1.019679106  | 5.333298828    | 15.95066772  | 5.64E-52       | 1.87E-50         | 107.0066143 |
| USP53         | -1.066764578 | 2.12488247     | -15.94851327 | 5.81E-52       | 1.92E-50         | 106.9783991 |
| DUSP1         | -2.203479824 | 5.916851297    | -15.93245794 | 7.17E-52       | 2.36E-50         | 106.7682118 |
| MCM4          | 1.459050215  | 4.163564319    | 15.92280965  | 8.14E-52       | 2.67E-50         | 106.6419673 |
| MIR568        | -1.533606299 | 3.19249201     | -15.92130487 | 8.30E-52       | 2.72E-50         | 106.6222822 |
| NUDT16L1      | 1.109518307  | 4.129740014    | 15.91042841  | 9.58E-52       | 3.14E-50         | 106.4800352 |
| CDCA3         | 1.304044594  | 1.631550346    | 15.90662804  | 1.01E-51       | 3.29E-50         | 106.4303472 |
| SKA1          | 1.378880776  | 1.623993211    | 15.89412522  | 1.19E-51       | 3.87E-50         | 106.2669324 |
| GPR34         | -1.39423315  | 2.23288461     | -15.88780642 | 1.29E-51       | 4.20E-50         | 106.1843757 |
| PTGIS         | -1.698731285 | 2.286876542    | -15.88645174 | 1.31E-51       | 4.27E-50         | 106.1666792 |
| KLF6          | -1.273633106 | 4.934448836    | -15.87788723 | 1.47E-51       | 4.77E-50         | 106.0548217 |

| <b>Symbol</b> | <b>logFC</b> | <b>AveExpr</b> | <b>t</b>     | <b>P.Value</b> | <b>adj.P.Val</b> | <b>B</b>    |
|---------------|--------------|----------------|--------------|----------------|------------------|-------------|
| TRIP13        | 1.508221581  | 2.390437047    | 15.87380635  | 1.55E-51       | 5.03E-50         | 106.0015367 |
| NGFR          | -1.972355324 | 1.880535023    | -15.86682331 | 1.70E-51       | 5.50E-50         | 105.9103779 |
| CDC45         | 1.456404464  | 1.945364778    | 15.85654867  | 1.94E-51       | 6.29E-50         | 105.7762968 |
| MIR27B        | -1.051740696 | 0.530287729    | -15.84820923 | 2.17E-51       | 7.00E-50         | 105.6675107 |
| RCAN1         | -1.763743399 | 3.069140396    | -15.83263299 | 2.66E-51       | 8.57E-50         | 105.4644213 |
| RHOA          | -1.576037044 | 2.587906398    | -15.83242418 | 2.66E-51       | 8.59E-50         | 105.4616996 |
| NMRAL1        | 1.001734197  | 3.94511761     | 15.82049901  | 3.11E-51       | 1.00E-49         | 105.3063029 |
| NVL           | 1.02393653   | 3.310357999    | 15.81657695  | 3.28E-51       | 1.05E-49         | 105.2552111 |
| FAM110A       | 1.262525541  | 3.569006232    | 15.80948657  | 3.59E-51       | 1.15E-49         | 105.1628673 |
| LAMA3         | -1.864373016 | 1.992549897    | -15.80822043 | 3.65E-51       | 1.17E-49         | 105.14638   |
| PKDCC         | -1.437978944 | 1.59599847     | -15.79676152 | 4.25E-51       | 1.36E-49         | 104.9972057 |
| GALE          | 1.237600344  | 3.20079399     | 15.7829917   | 5.08E-51       | 1.63E-49         | 104.8180401 |
| BCL6          | -1.187848894 | 3.476990581    | -15.75241967 | 7.58E-51       | 2.41E-49         | 104.4206154 |
| EIF3L         | -1.118040608 | 5.163209996    | -15.74947852 | 7.87E-51       | 2.50E-49         | 104.3824079 |
| TMEM132A      | 1.7214685    | 3.51038565     | 15.74837223  | 7.99E-51       | 2.54E-49         | 104.3680377 |
| GGCT          | 1.21977952   | 5.474234786    | 15.7035741   | 1.43E-50       | 4.53E-49         | 103.7866811 |
| HOTAIRM1      | -1.192792027 | 1.267239748    | -15.69437499 | 1.61E-50       | 5.09E-49         | 103.6674354 |
| RP11-58O9.2   | -1.279307703 | 0.891189756    | -15.6865881  | 1.79E-50       | 5.62E-49         | 103.5665316 |
| YDJC          | 1.172071126  | 3.342943828    | 15.67849705  | 1.98E-50       | 6.24E-49         | 103.461721  |
| PVRL2         | 1.227718271  | 5.779611121    | 15.67311387  | 2.13E-50       | 6.68E-49         | 103.3920073 |
| CSRP1         | -1.213647151 | 4.908686577    | -15.66384768 | 2.40E-50       | 7.52E-49         | 103.2720443 |
| LRP1          | -1.599206221 | 4.203392438    | -15.65836242 | 2.58E-50       | 8.06E-49         | 103.2010521 |
| TMEM47        | -1.675841669 | 2.79959627     | -15.65543701 | 2.68E-50       | 8.36E-49         | 103.1631971 |
| PTN           | -2.684334561 | 3.171987177    | -15.64818226 | 2.94E-50       | 9.18E-49         | 103.0693401 |

| <b>Symbol</b> | <b>logFC</b> | <b>AveExpr</b> | <b>t</b>     | <b>P.Value</b> | <b>adj.P.Val</b> | <b>B</b>    |
|---------------|--------------|----------------|--------------|----------------|------------------|-------------|
| GPM6B         | -1.492346504 | 1.762448616    | -15.6288432  | 3.78E-50       | 1.18E-48         | 102.8192832 |
| ESPL1         | 1.120000911  | 1.445490951    | 15.62858083  | 3.80E-50       | 1.18E-48         | 102.8158921 |
| ALDH1A3       | -1.545550792 | 1.84878387     | -15.62256461 | 4.10E-50       | 1.27E-48         | 102.7381437 |
| OLR1          | 1.590063343  | 2.587716811    | 15.61892589  | 4.30E-50       | 1.33E-48         | 102.6911295 |
| TBC1D4        | -1.203319913 | 2.995594125    | -15.61725038 | 4.40E-50       | 1.36E-48         | 102.6694835 |
| COBLL1        | -1.021627947 | 1.718720615    | -15.61434546 | 4.57E-50       | 1.42E-48         | 102.6319581 |
| GPRC5B        | -1.412006743 | 2.55525956     | -15.61064153 | 4.79E-50       | 1.48E-48         | 102.5841178 |
| JAM3          | -1.114080371 | 2.491443131    | -15.59588189 | 5.80E-50       | 1.79E-48         | 102.3935553 |
| GRAMD3        | -1.179756178 | 2.576633138    | -15.59417137 | 5.93E-50       | 1.83E-48         | 102.3714783 |
| GRASP         | -1.116187076 | 1.676048078    | -15.57972651 | 7.15E-50       | 2.20E-48         | 102.1851076 |
| PIGR          | -3.203053837 | 2.143032864    | -15.5767234  | 7.44E-50       | 2.29E-48         | 102.146375  |
| TEAD1         | -1.125945557 | 2.90086579     | -15.57233349 | 7.87E-50       | 2.42E-48         | 102.0897651 |
| RP11-855A2.5  | -1.161085784 | 0.77214662     | -15.56073656 | 9.15E-50       | 2.81E-48         | 101.9402675 |
| HSPE1         | 1.001005071  | 5.429693825    | 15.55343915  | 1.01E-49       | 3.08E-48         | 101.8462333 |
| PRNP          | -1.522837027 | 4.867597312    | -15.54206886 | 1.16E-49       | 3.57E-48         | 101.6997735 |
| FNDC4         | -1.28337469  | 2.020402613    | -15.52062823 | 1.54E-49       | 4.69E-48         | 101.4237902 |
| ADD3          | -1.45572357  | 3.291733255    | -15.50925535 | 1.78E-49       | 5.42E-48         | 101.2775005 |
| CENPA         | 1.517245441  | 1.871721399    | 15.50006113  | 2.00E-49       | 6.09E-48         | 101.1592867 |
| TOMM40        | 1.013255655  | 4.080452752    | 15.49975451  | 2.01E-49       | 6.12E-48         | 101.1553451 |
| BBOX1         | -2.004467462 | 1.305136052    | -15.48537061 | 2.42E-49       | 7.34E-48         | 100.9705005 |
| HPRT1         | 1.015924879  | 4.517658579    | 15.4777749   | 2.67E-49       | 8.08E-48         | 100.8729352 |
| LPCAT2        | -1.051340675 | 1.985320085    | -15.46888782 | 3.00E-49       | 9.06E-48         | 100.7588225 |
| IL6           | -1.591230777 | 0.983175034    | -15.45375646 | 3.64E-49       | 1.10E-47         | 100.5646311 |
| IGSF9         | 1.473462274  | 2.908746511    | 15.45138805  | 3.75E-49       | 1.13E-47         | 100.534247  |

| <b>Symbol</b> | <b>logFC</b> | <b>AveExpr</b> | <b>t</b>     | <b>P.Value</b> | <b>adj.P.Val</b> | <b>B</b>    |
|---------------|--------------|----------------|--------------|----------------|------------------|-------------|
| CSN1S1        | -1.418043582 | 0.287374835    | -15.44910761 | 3.87E-49       | 1.16E-47         | 100.5049943 |
| SMS           | 1.010139086  | 5.673251648    | 15.44088719  | 4.30E-49       | 1.29E-47         | 100.3995694 |
| C6            | -1.053529017 | 0.478105114    | -15.43285119 | 4.77E-49       | 1.43E-47         | 100.2965455 |
| FADS3         | -1.034795854 | 1.972745642    | -15.40423119 | 6.89E-49       | 2.06E-47         | 99.92991699 |
| ACAA2         | -1.00822111  | 3.376756791    | -15.40308701 | 6.99E-49       | 2.09E-47         | 99.91526924 |
| HSPA12B       | -1.180802382 | 2.02252998     | -15.40170553 | 7.12E-49       | 2.13E-47         | 99.89758447 |
| LMNB2         | 1.115917686  | 3.698576489    | 15.39718136  | 7.54E-49       | 2.26E-47         | 99.83967638 |
| NAP1L2        | -1.077275169 | 0.944549818    | -15.39285293 | 7.98E-49       | 2.38E-47         | 99.78428418 |
| SLIT2         | -1.074518793 | 1.496134896    | -15.39280819 | 7.98E-49       | 2.38E-47         | 99.78371175 |
| PRSS8         | 1.779292736  | 5.817457683    | 15.39054517  | 8.22E-49       | 2.45E-47         | 99.75475532 |
| RP11-413E6.1  | -1.072518583 | 0.961531103    | -15.38005093 | 9.40E-49       | 2.80E-47         | 99.62051384 |
| SYNGR2        | 1.053305291  | 5.941250516    | 15.36981899  | 1.07E-48       | 3.18E-47         | 99.48968623 |
| TYMS          | 1.494146049  | 3.238994014    | 15.36467577  | 1.15E-48       | 3.40E-47         | 99.4239457  |
| ITGA9         | -1.142201012 | 1.804694841    | -15.35992525 | 1.22E-48       | 3.60E-47         | 99.36323774 |
| PKP3          | 1.296305474  | 4.111295625    | 15.34517152  | 1.47E-48       | 4.34E-47         | 99.17477585 |
| RP11-490M8.1  | -1.299004317 | 2.067856142    | -15.34176718 | 1.54E-48       | 4.53E-47         | 99.13130644 |
| MAFF          | -1.19231827  | 2.164167467    | -15.33511226 | 1.67E-48       | 4.93E-47         | 99.04634935 |
| RGS2          | -2.054340541 | 3.598422098    | -15.32559898 | 1.89E-48       | 5.55E-47         | 98.92494504 |
| P4HA3         | 1.176334852  | 1.573962606    | 15.32515108  | 1.90E-48       | 5.58E-47         | 98.9192303  |
| DEPDC1B       | 1.034752099  | 1.237755134    | 15.31438012  | 2.18E-48       | 6.40E-47         | 98.78183908 |
| KRT18         | 1.971447305  | 7.517163442    | 15.2987257   | 2.67E-48       | 7.82E-47         | 98.58227058 |
| SKAP2         | -1.138506132 | 2.657445898    | -15.29677368 | 2.74E-48       | 8.00E-47         | 98.55739491 |
| PRKAR2B       | -1.851433675 | 3.591650426    | -15.28684698 | 3.11E-48       | 9.07E-47         | 98.43092675 |
| MYCBP2        | -1.079534692 | 2.578917192    | -15.24806742 | 5.10E-48       | 1.48E-46         | 97.93739222 |

| <b>Symbol</b> | <b>logFC</b> | <b>AveExpr</b> | <b>t</b>     | <b>P.Value</b> | <b>adj.P.Val</b> | <b>B</b>    |
|---------------|--------------|----------------|--------------|----------------|------------------|-------------|
| CPM           | -1.400282559 | 2.240832572    | -15.24093723 | 5.58E-48       | 1.62E-46         | 97.84673968 |
| ARHGAP11A     | 1.211450253  | 1.900739543    | 15.23176315  | 6.28E-48       | 1.82E-46         | 97.73014315 |
| EVPL          | 1.262581744  | 2.823814259    | 15.22070705  | 7.23E-48       | 2.09E-46         | 97.58968969 |
| NAT14         | 1.313480697  | 3.148564643    | 15.21630356  | 7.65E-48       | 2.21E-46         | 97.53376802 |
| ROGDI         | 1.23115336   | 3.50018928     | 15.18769572  | 1.10E-47       | 3.17E-46         | 97.1707297  |
| GINS2         | 1.40543167   | 2.562910398    | 15.18203671  | 1.18E-47       | 3.41E-46         | 97.09897016 |
| KIRREL        | -1.323528818 | 2.831528405    | -15.18127173 | 1.20E-47       | 3.44E-46         | 97.08927111 |
| DPYD          | -1.180846836 | 2.27663714     | -15.16816021 | 1.41E-47       | 4.06E-46         | 96.9230839  |
| ATF3          | -1.996349184 | 3.11713104     | -15.15728508 | 1.62E-47       | 4.65E-46         | 96.7853157  |
| KRT19         | 2.344273579  | 8.84508662     | 15.15639857  | 1.64E-47       | 4.70E-46         | 96.77408817 |
| REEP4         | 1.096409512  | 3.580341154    | 15.15288905  | 1.72E-47       | 4.91E-46         | 96.72964482 |
| RP11-417E7.2  | 1.743737139  | 2.074580911    | 15.14593772  | 1.87E-47       | 5.36E-46         | 96.64163606 |
| SGOL1         | 1.048261211  | 1.198173358    | 15.12998115  | 2.30E-47       | 6.56E-46         | 96.43971704 |
| DES           | -1.846017679 | 0.915233481    | -15.10751166 | 3.05E-47       | 8.69E-46         | 96.15562434 |
| SGK1          | -1.265139691 | 2.660372405    | -15.09493274 | 3.58E-47       | 1.02E-45         | 95.996707   |
| CHST3         | -1.390776287 | 2.139345886    | -15.09192816 | 3.72E-47       | 1.06E-45         | 95.95876153 |
| RP11-553L6.5  | -1.183631617 | 3.434107947    | -15.08769607 | 3.93E-47       | 1.11E-45         | 95.90532214 |
| RAD51AP1      | 1.344541487  | 2.23295009     | 15.08672418  | 3.98E-47       | 1.13E-45         | 95.89305132 |
| DBNDD1        | 1.410650039  | 3.028890172    | 15.08601529  | 4.01E-47       | 1.14E-45         | 95.88410136 |
| COL1A1        | 2.344559218  | 8.74961256     | 15.0833825   | 4.15E-47       | 1.17E-45         | 95.85086425 |
| PYROXD2       | -1.072106132 | 1.807794498    | -15.08103506 | 4.27E-47       | 1.21E-45         | 95.82123275 |
| YAP1          | -1.159859309 | 4.111887377    | -15.07883323 | 4.39E-47       | 1.24E-45         | 95.79344197 |
| SEPP1         | -1.783340412 | 4.020550144    | -15.0771029  | 4.49E-47       | 1.27E-45         | 95.77160436 |
| PDGFRA        | -1.444157001 | 2.443756901    | -15.04400747 | 6.83E-47       | 1.92E-45         | 95.35424863 |

| <b>Symbol</b> | <b>logFC</b> | <b>AveExpr</b> | <b>t</b>     | <b>P.Value</b> | <b>adj.P.Val</b> | <b>B</b>    |
|---------------|--------------|----------------|--------------|----------------|------------------|-------------|
| CLDN8         | -2.146549739 | 1.92601935     | -15.04382656 | 6.85E-47       | 1.92E-45         | 95.35196891 |
| ANGPTL4       | -2.088390234 | 2.537607648    | -14.99591179 | 1.25E-46       | 3.51E-45         | 94.74883436 |
| CLDN7         | 1.462595399  | 5.210873438    | 14.99433503  | 1.28E-46       | 3.57E-45         | 94.72900881 |
| NMB           | -1.492054762 | 2.447665726    | -14.97396756 | 1.66E-46       | 4.61E-45         | 94.4730429  |
| SIRPA         | -1.259016722 | 3.549465616    | -14.96105711 | 1.95E-46       | 5.40E-45         | 94.31091451 |
| SELP          | -1.577649124 | 1.576686208    | -14.95262115 | 2.17E-46       | 6.00E-45         | 94.20502754 |
| PSRC1         | 1.10378301   | 2.121510429    | 14.94812089  | 2.29E-46       | 6.35E-45         | 94.14855753 |
| DCN           | -2.122933224 | 5.302605111    | -14.94629851 | 2.35E-46       | 6.49E-45         | 94.12569336 |
| STXBP1        | -1.084533956 | 2.332836862    | -14.92460957 | 3.08E-46       | 8.49E-45         | 93.85372123 |
| HRASLS5       | -2.060800836 | 1.741580946    | -14.92095304 | 3.23E-46       | 8.88E-45         | 93.80789606 |
| ARHGEF6       | -1.444658059 | 3.177387727    | -14.91673449 | 3.41E-46       | 9.36E-45         | 93.7550369  |
| PLAUR         | 1.325517383  | 2.97732858     | 14.9094131   | 3.73E-46       | 1.02E-44         | 93.66332259 |
| SDC1          | 1.962989773  | 6.279124097    | 14.90634933  | 3.88E-46       | 1.06E-44         | 93.62495222 |
| MYEOV         | -1.646531021 | 0.901379948    | -14.90264781 | 4.07E-46       | 1.11E-44         | 93.57860178 |
| SASH1         | -1.355186386 | 2.860182726    | -14.89813676 | 4.30E-46       | 1.18E-44         | 93.52212501 |
| CDT1          | 1.446929324  | 2.271902985    | 14.89479732  | 4.49E-46       | 1.23E-44         | 93.48032401 |
| CENPE         | 1.093259399  | 1.443801559    | 14.89306965  | 4.59E-46       | 1.25E-44         | 93.45870061 |
| HAGHL         | 1.280995781  | 1.501653261    | 14.88843309  | 4.86E-46       | 1.32E-44         | 93.40067805 |
| TIE1          | -1.027352116 | 2.273743167    | -14.88414371 | 5.13E-46       | 1.40E-44         | 93.34701116 |
| KIF15         | 1.113762051  | 1.519287909    | 14.8783626   | 5.52E-46       | 1.50E-44         | 93.27469702 |
| OLFML2A       | -1.111240788 | 2.890912516    | -14.87270774 | 5.93E-46       | 1.61E-44         | 93.20398068 |
| ANKRD35       | -1.072708501 | 0.963165416    | -14.85703808 | 7.21E-46       | 1.96E-44         | 93.00812086 |
| HSD17B11      | -1.237176569 | 3.194273773    | -14.8556615  | 7.34E-46       | 1.99E-44         | 92.99092123 |
| TCF7L2        | -1.108395621 | 2.84621372     | -14.8548019  | 7.42E-46       | 2.01E-44         | 92.98018162 |



| <b>Symbol</b> | <b>logFC</b> | <b>AveExpr</b> | <b>t</b>     | <b>P.Value</b> | <b>adj.P.Val</b> | <b>B</b>    |
|---------------|--------------|----------------|--------------|----------------|------------------|-------------|
| IRS2          | -1.503407118 | 2.298437289    | -14.8454835  | 8.34E-46       | 2.25E-44         | 92.86378686 |
| IL17RD        | -1.326900077 | 2.006323347    | -14.83936133 | 9.01E-46       | 2.43E-44         | 92.78734287 |
| HOXA9         | -1.23825217  | 0.845752715    | -14.83036031 | 1.01E-45       | 2.72E-44         | 92.67499135 |
| MEST          | -1.640906264 | 3.306940665    | -14.825685   | 1.07E-45       | 2.88E-44         | 92.61665214 |
| CTD-3252C9.4  | -1.477295106 | 2.703975011    | -14.82352942 | 1.10E-45       | 2.96E-44         | 92.58975876 |
| PCYOX1        | -1.0014976   | 4.6343011      | -14.8218774  | 1.12E-45       | 3.02E-44         | 92.56914964 |
| MID1          | -1.205179363 | 1.190887026    | -14.82046965 | 1.14E-45       | 3.07E-44         | 92.55158916 |
| MYL9          | -1.569596276 | 6.236171655    | -14.81023209 | 1.30E-45       | 3.48E-44         | 92.42391789 |
| PPP1R15A      | -1.150081002 | 4.175337771    | -14.8086736  | 1.32E-45       | 3.55E-44         | 92.40448748 |
| CERS2         | 1.154622738  | 5.996076151    | 14.80343278  | 1.41E-45       | 3.79E-44         | 92.33915805 |
| TTK           | 1.373466455  | 1.83525097     | 14.79560593  | 1.56E-45       | 4.17E-44         | 92.24162184 |
| TONSL         | 1.130577808  | 1.937004729    | 14.78772668  | 1.72E-45       | 4.60E-44         | 92.14346827 |
| PPP1R14B      | 1.290025196  | 5.186326818    | 14.7629984   | 2.34E-45       | 6.26E-44         | 91.83565524 |
| TJP3          | 1.523571578  | 3.595624984    | 14.76201799  | 2.37E-45       | 6.33E-44         | 91.82345856 |
| IFFO2         | -1.263567668 | 2.370165324    | -14.76071734 | 2.41E-45       | 6.43E-44         | 91.80727884 |
| SAPCD2        | 1.386354619  | 2.401018331    | 14.75950315  | 2.45E-45       | 6.53E-44         | 91.79217549 |
| CLEC14A       | -1.21242612  | 3.20674232     | -14.75583274 | 2.56E-45       | 6.83E-44         | 91.74652439 |
| MAFG-AS1      | 1.11149523   | 2.246458253    | 14.74161978  | 3.06E-45       | 8.13E-44         | 91.56982278 |
| KLF10         | -1.03883965  | 4.332599599    | -14.73914025 | 3.16E-45       | 8.38E-44         | 91.53900822 |
| NMNAT2        | -1.041305162 | 0.585804308    | -14.72722217 | 3.66E-45       | 9.70E-44         | 91.39094482 |
| VIM           | -1.351661388 | 7.406899844    | -14.67018166 | 7.46E-45       | 1.96E-43         | 90.68344612 |
| PPL           | -1.340664503 | 3.272023276    | -14.66929099 | 7.54E-45       | 1.98E-43         | 90.67241376 |
| CCDC8         | -1.646389302 | 2.330659332    | -14.65836656 | 8.64E-45       | 2.26E-43         | 90.53713459 |
| CDC6          | 1.561518902  | 2.220579766    | 14.64829003  | 9.79E-45       | 2.56E-43         | 90.41241668 |

| <b>Symbol</b> | <b>logFC</b> | <b>AveExpr</b> | <b>t</b>     | <b>P.Value</b> | <b>adj.P.Val</b> | <b>B</b>    |
|---------------|--------------|----------------|--------------|----------------|------------------|-------------|
| IRF7          | 1.493219405  | 3.773556083    | 14.63777601  | 1.12E-44       | 2.91E-43         | 90.28234704 |
| CILP2         | 1.504878755  | 1.837955423    | 14.63109663  | 1.21E-44       | 3.15E-43         | 90.19974944 |
| SEMA6A        | -1.175929928 | 1.413985622    | -14.61876309 | 1.41E-44       | 3.67E-43         | 90.04730049 |
| FAM64A        | 1.264490476  | 1.563479949    | 14.59617271  | 1.87E-44       | 4.84E-43         | 89.76830221 |
| RAD54L        | 1.144491703  | 1.480293393    | 14.59347026  | 1.93E-44       | 5.00E-43         | 89.73494611 |
| CACNB3        | 1.019981672  | 2.694004854    | 14.59263191  | 1.95E-44       | 5.05E-43         | 89.72459928 |
| EMILIN2       | -1.052736906 | 1.763165402    | -14.58776224 | 2.08E-44       | 5.35E-43         | 89.66450644 |
| SEPHS2        | 1.053610919  | 5.692298616    | 14.56426348  | 2.78E-44       | 7.13E-43         | 89.37472171 |
| ADAM8         | 1.353674555  | 2.236567965    | 14.560568    | 2.91E-44       | 7.46E-43         | 89.32917875 |
| MGAT3         | -1.082596044 | 0.962365288    | -14.55783434 | 3.01E-44       | 7.71E-43         | 89.29549447 |
| MISP          | 2.276552865  | 3.204476543    | 14.55325721  | 3.18E-44       | 8.15E-43         | 89.23910459 |
| OLFML1        | -1.121119143 | 2.176464278    | -14.54404219 | 3.57E-44       | 9.11E-43         | 89.12561353 |
| CAB39L        | -1.203145753 | 2.912275779    | -14.52575294 | 4.47E-44       | 1.14E-42         | 88.90051308 |
| MRPS12        | 1.003140802  | 3.782811873    | 14.50633397  | 5.69E-44       | 1.45E-42         | 88.66172343 |
| LAMP5         | 1.803472436  | 2.54142058     | 14.5035386   | 5.89E-44       | 1.50E-42         | 88.6273678  |
| KCTD14        | -1.428006238 | 1.156251968    | -14.47950302 | 7.92E-44       | 2.01E-42         | 88.33215606 |
| DEPDC1        | 1.224577107  | 1.436131259    | 14.46975909  | 8.93E-44       | 2.26E-42         | 88.21257525 |
| CKAP2         | 1.052963816  | 3.037567789    | 14.46517974  | 9.45E-44       | 2.39E-42         | 88.15639533 |
| ATAD2         | 1.447201447  | 3.372947444    | 14.45487725  | 1.07E-43       | 2.71E-42         | 88.03004865 |
| STMN1         | 1.429340518  | 4.743589782    | 14.44754609  | 1.17E-43       | 2.96E-42         | 87.94017961 |
| CYB561        | 1.152348324  | 5.094239621    | 14.43717405  | 1.33E-43       | 3.36E-42         | 87.81308832 |
| PGM1          | -1.059353287 | 4.059640718    | -14.42986203 | 1.46E-43       | 3.67E-42         | 87.72353036 |
| RND3          | -1.559808655 | 3.589981988    | -14.40937408 | 1.88E-43       | 4.71E-42         | 87.47276188 |
| EPN3          | 1.561798951  | 3.03785182     | 14.39551804  | 2.23E-43       | 5.58E-42         | 87.30330758 |

| <b>Symbol</b> | <b>logFC</b> | <b>AveExpr</b> | <b>t</b>     | <b>P.Value</b> | <b>adj.P.Val</b> | <b>B</b>    |
|---------------|--------------|----------------|--------------|----------------|------------------|-------------|
| KIF26B        | 1.164733429  | 1.531018418    | 14.38134547  | 2.65E-43       | 6.63E-42         | 87.13010016 |
| LRRC59        | 1.084476304  | 5.289095067    | 14.37346506  | 2.92E-43       | 7.29E-42         | 87.03384278 |
| APCDD1L       | -1.388241165 | 0.958525217    | -14.37116889 | 3.00E-43       | 7.50E-42         | 87.00580261 |
| EPHA2         | -1.067863256 | 2.25123162     | -14.36485448 | 3.25E-43       | 8.09E-42         | 86.9287088  |
| CLIC2         | -1.096854825 | 2.361526433    | -14.36282603 | 3.33E-43       | 8.29E-42         | 86.90394812 |
| IER5L         | 1.248377885  | 2.677614459    | 14.3567498   | 3.59E-43       | 8.92E-42         | 86.82979199 |
| CFI           | -1.276532341 | 2.294087116    | -14.35330515 | 3.74E-43       | 9.30E-42         | 86.78776227 |
| PROL1         | -2.074506586 | 0.824481617    | -14.32664124 | 5.19E-43       | 1.29E-41         | 86.46266261 |
| ACTA2         | -1.687480289 | 6.427261019    | -14.31690542 | 5.84E-43       | 1.45E-41         | 86.3440643  |
| SLC16A3       | 1.349994463  | 2.232210749    | 14.3142944   | 6.03E-43       | 1.49E-41         | 86.31226729 |
| CCL21         | -2.750352645 | 2.896338136    | -14.30907052 | 6.43E-43       | 1.59E-41         | 86.24866337 |
| ISG15         | 2.551718549  | 5.736400158    | 14.30147007  | 7.06E-43       | 1.75E-41         | 86.15615219 |
| TMEM54        | 1.127592846  | 5.010396289    | 14.24886439  | 1.34E-42       | 3.30E-41         | 85.51679324 |
| SOSTDC1       | -1.885874811 | 1.185092409    | -14.21503877 | 2.03E-42       | 4.96E-41         | 85.10655942 |
| ECHDC1        | -1.091338985 | 2.85285744     | -14.21197057 | 2.10E-42       | 5.14E-41         | 85.06938261 |
| BRINP1        | -1.148074175 | 0.642735157    | -14.20638846 | 2.25E-42       | 5.50E-41         | 85.00175971 |
| KIF14         | 1.086739792  | 1.20037364     | 14.19502144  | 2.59E-42       | 6.31E-41         | 84.86411511 |
| A2M           | -1.404301166 | 6.60612516     | -14.18477383 | 2.93E-42       | 7.13E-41         | 84.74009208 |
| SEMA5A        | -1.295513405 | 2.005585919    | -14.18402848 | 2.96E-42       | 7.19E-41         | 84.73107389 |
| NEDD9         | -1.302135554 | 2.654926968    | -14.18135481 | 3.05E-42       | 7.42E-41         | 84.69872705 |
| CD248         | -1.415135794 | 4.172072045    | -14.18123291 | 3.06E-42       | 7.43E-41         | 84.69725242 |
| PRR36         | 1.545414414  | 2.85906446     | 14.16733588  | 3.62E-42       | 8.78E-41         | 84.52919264 |
| MAL2          | 1.48373418   | 6.164846734    | 14.1525767   | 4.33E-42       | 1.05E-40         | 84.35083432 |
| ECHDC3        | -1.244155615 | 3.196826443    | -14.14647748 | 4.66E-42       | 1.13E-40         | 84.27716614 |

| <b>Symbol</b> | <b>logFC</b> | <b>AveExpr</b> | <b>t</b>     | <b>P.Value</b> | <b>adj.P.Val</b> | <b>B</b>    |
|---------------|--------------|----------------|--------------|----------------|------------------|-------------|
| RASSF7        | 1.372250277  | 3.446115422    | 14.09721515  | 8.48E-42       | 2.03E-40         | 83.68298648 |
| DPP4          | -1.172453796 | 1.532793218    | -14.09564963 | 8.64E-42       | 2.07E-40         | 83.66412791 |
| LAMA4         | -1.176719021 | 3.258665295    | -14.09489236 | 8.72E-42       | 2.09E-40         | 83.65500625 |
| MBNL2         | -1.17482339  | 3.882809247    | -14.08949071 | 9.31E-42       | 2.23E-40         | 83.58995097 |
| FAM102A       | 1.067616874  | 4.94014285     | 14.08647768  | 9.65E-42       | 2.31E-40         | 83.55367101 |
| STRA13        | 1.201887691  | 4.588921988    | 14.08327059  | 1.00E-41       | 2.40E-40         | 83.51506038 |
| ACSL4         | -1.161320222 | 2.690174259    | -14.07962191 | 1.05E-41       | 2.51E-40         | 83.47114098 |
| JUN           | -1.522491982 | 5.743896098    | -14.06663368 | 1.23E-41       | 2.93E-40         | 83.31486623 |
| MDFIC         | -1.003669262 | 2.89893581     | -14.06301375 | 1.28E-41       | 3.06E-40         | 83.27132946 |
| SMIM3         | -1.092013446 | 3.32298761     | -14.04923195 | 1.51E-41       | 3.60E-40         | 83.10564885 |
| PRG4          | -1.446651715 | 0.911273429    | -14.03103539 | 1.89E-41       | 4.47E-40         | 82.88707231 |
| AVPI1         | -1.002234911 | 2.885249517    | -13.99927895 | 2.77E-41       | 6.54E-40         | 82.50609797 |
| MRC1          | -1.436732689 | 1.524263234    | -13.99635693 | 2.87E-41       | 6.76E-40         | 82.4710741  |
| LPHN2         | -1.272480609 | 2.328373633    | -13.98572109 | 3.26E-41       | 7.67E-40         | 82.34363499 |
| PSME2         | 1.061272789  | 5.115086801    | 13.96890241  | 3.99E-41       | 9.36E-40         | 82.14225382 |
| GRHL2         | 1.057412861  | 3.949185918    | 13.96053705  | 4.41E-41       | 1.03E-39         | 82.04215415 |
| EGR3          | -1.951956233 | 2.351105947    | -13.95929365 | 4.48E-41       | 1.05E-39         | 82.02727936 |
| KDR           | -1.044819727 | 2.922739653    | -13.94185371 | 5.52E-41       | 1.29E-39         | 81.81874466 |
| ABHD11        | 1.170561092  | 4.464225131    | 13.90356628  | 8.75E-41       | 2.03E-39         | 81.36158419 |
| CCND2         | -1.087289063 | 2.557136041    | -13.90063266 | 9.06E-41       | 2.10E-39         | 81.32659316 |
| GIMAP7        | -1.462186261 | 3.203577764    | -13.89933232 | 9.20E-41       | 2.13E-39         | 81.31108499 |
| ZFP36L2       | -1.316049855 | 5.768771858    | -13.89271585 | 9.96E-41       | 2.30E-39         | 81.23219125 |
| RBPM5         | -1.002946401 | 1.438733187    | -13.86992114 | 1.31E-40       | 3.01E-39         | 80.96059694 |
| TPPP          | -1.13636816  | 1.28351711     | -13.85695806 | 1.53E-40       | 3.50E-39         | 80.80628706 |

| <b>Symbol</b> | <b>logFC</b> | <b>AveExpr</b> | <b>t</b>     | <b>P.Value</b> | <b>adj.P.Val</b> | <b>B</b>    |
|---------------|--------------|----------------|--------------|----------------|------------------|-------------|
| BIN1          | -1.110587127 | 1.880491435    | -13.84625344 | 1.74E-40       | 3.98E-39         | 80.6789396  |
| SDF2L1        | 1.215400986  | 3.988773453    | 13.84231901  | 1.82E-40       | 4.16E-39         | 80.63215142 |
| MTL5          | 1.319680178  | 2.5225497      | 13.84110179  | 1.85E-40       | 4.22E-39         | 80.61767815 |
| CYGB          | -1.163995924 | 2.489103064    | -13.83202809 | 2.06E-40       | 4.69E-39         | 80.50981715 |
| MND1          | 1.167613278  | 1.577116987    | 13.82794974  | 2.16E-40       | 4.92E-39         | 80.46135337 |
| CANT1         | 1.109840732  | 5.064177487    | 13.82612126  | 2.21E-40       | 5.02E-39         | 80.43962863 |
| F12           | 1.28064179   | 1.719193796    | 13.80300342  | 2.91E-40       | 6.61E-39         | 80.1651359  |
| GPRC5A        | 1.984621073  | 4.728163866    | 13.80250575  | 2.93E-40       | 6.64E-39         | 80.15923044 |
| STAC2         | -2.965260695 | 2.165824641    | -13.79696315 | 3.13E-40       | 7.09E-39         | 80.09347041 |
| TMEM79        | 1.088527158  | 3.103047405    | 13.79414074  | 3.24E-40       | 7.33E-39         | 80.05999133 |
| CREB3L4       | 1.541908577  | 5.136642598    | 13.79105342  | 3.36E-40       | 7.60E-39         | 80.02337562 |
| CALB2         | -2.230396092 | 2.236036616    | -13.78691153 | 3.53E-40       | 7.97E-39         | 79.97426193 |
| MMP13         | 2.348769242  | 2.310955249    | 13.77996179  | 3.83E-40       | 8.65E-39         | 79.89187703 |
| GPR68         | 1.059277997  | 2.102609638    | 13.76600226  | 4.53E-40       | 1.02E-38         | 79.72648599 |
| FAM3D         | -1.563098535 | 0.779785706    | -13.75041915 | 5.45E-40       | 1.22E-38         | 79.54200181 |
| WLS           | -1.624409227 | 3.3504745      | -13.72959972 | 6.98E-40       | 1.56E-38         | 79.29576135 |
| HMGA1         | 1.330644985  | 5.583915551    | 13.72514501  | 7.36E-40       | 1.65E-38         | 79.24310856 |
| SLC13A2       | -1.548883279 | 0.965124827    | -13.70837866 | 8.98E-40       | 2.00E-38         | 79.04504807 |
| B4GALNT4      | 1.427046039  | 2.888284038    | 13.68814391  | 1.14E-39       | 2.54E-38         | 78.80624853 |
| SMIM22        | 2.035317141  | 4.226993322    | 13.66851464  | 1.44E-39       | 3.20E-38         | 78.57483839 |
| NRP1          | -1.038050081 | 3.245804653    | -13.65636833 | 1.66E-39       | 3.68E-38         | 78.43176568 |
| RASL12        | -1.070275335 | 1.995415798    | -13.65539434 | 1.68E-39       | 3.73E-38         | 78.42029688 |
| SAC3D1        | 1.028676715  | 2.927308397    | 13.654696    | 1.70E-39       | 3.75E-38         | 78.41207433 |
| PC            | -1.142958103 | 2.889951672    | -13.64706326 | 1.86E-39       | 4.10E-38         | 78.32222245 |

| <b>Symbol</b> | <b>logFC</b> | <b>AveExpr</b> | <b>t</b>     | <b>P.Value</b> | <b>adj.P.Val</b> | <b>B</b>    |
|---------------|--------------|----------------|--------------|----------------|------------------|-------------|
| HES6          | 1.415635688  | 2.015103328    | 13.62414618  | 2.44E-39       | 5.36E-38         | 78.05266408 |
| ACADS         | -1.279492948 | 2.863044998    | -13.61141882 | 2.83E-39       | 6.21E-38         | 77.90310258 |
| EPS8          | -1.06885293  | 3.270954206    | -13.59040041 | 3.63E-39       | 7.92E-38         | 77.6563338  |
| LAMB3         | -2.083514608 | 3.339237062    | -13.5892656  | 3.68E-39       | 8.02E-38         | 77.64301833 |
| TTYH3         | 1.071127306  | 4.017374258    | 13.57846374  | 4.18E-39       | 9.10E-38         | 77.51631354 |
| RP11-211G23.2 | -1.242892608 | 0.561598174    | -13.57684542 | 4.26E-39       | 9.28E-38         | 77.49733711 |
| CXCL10        | 2.495672073  | 4.23366841     | 13.56836484  | 4.71E-39       | 1.02E-37         | 77.39792067 |
| SERINC2       | 1.456322521  | 5.474644817    | 13.55922166  | 5.24E-39       | 1.14E-37         | 77.29078738 |
| HIST1H4I      | 1.429297428  | 3.32502552     | 13.54915129  | 5.90E-39       | 1.28E-37         | 77.17285068 |
| PPP1R14BP3    | 1.23384008   | 4.449513228    | 13.54518799  | 6.18E-39       | 1.34E-37         | 77.12645307 |
| TMEM125       | 1.148681755  | 3.498244915    | 13.53872975  | 6.67E-39       | 1.44E-37         | 77.05086871 |
| ADM2          | 1.151579895  | 1.930545926    | 13.53742326  | 6.77E-39       | 1.46E-37         | 77.03558131 |
| SNCG          | -2.335611649 | 3.426933844    | -13.53453774 | 7.01E-39       | 1.51E-37         | 77.00182129 |
| LINC01235     | -1.29522551  | 1.166145244    | -13.51995785 | 8.32E-39       | 1.79E-37         | 76.83131984 |
| C7            | -1.999116917 | 1.758644558    | -13.5049774  | 9.92E-39       | 2.13E-37         | 76.65627383 |
| RRAGD         | -1.115001142 | 1.895370312    | -13.49761139 | 1.08E-38       | 2.31E-37         | 76.57025418 |
| IRX1          | -2.081481984 | 1.787681182    | -13.48702418 | 1.22E-38       | 2.61E-37         | 76.4466777  |
| ALPL          | -1.607195745 | 2.584745126    | -13.47063978 | 1.48E-38       | 3.15E-37         | 76.25557464 |
| RAB26         | 1.449725653  | 1.912439489    | 13.45524603  | 1.78E-38       | 3.77E-37         | 76.07618109 |
| TYMP          | 1.492048735  | 4.573356989    | 13.44442044  | 2.02E-38       | 4.28E-37         | 75.95011318 |
| C1QTNF1       | -1.272845255 | 2.71345258     | -13.44193096 | 2.08E-38       | 4.40E-37         | 75.92113277 |
| RP11-536O18.1 | -1.144370616 | 0.93655011     | -13.43765636 | 2.18E-38       | 4.63E-37         | 75.87138073 |
| LAMC1         | -1.140549717 | 4.765761629    | -13.41197117 | 2.95E-38       | 6.22E-37         | 75.57267491 |
| GAS1          | -1.491966038 | 3.230225827    | -13.40575504 | 3.17E-38       | 6.67E-37         | 75.50044736 |

| <b>Symbol</b> | <b>logFC</b> | <b>AveExpr</b> | <b>t</b>     | <b>P.Value</b> | <b>adj.P.Val</b> | <b>B</b>    |
|---------------|--------------|----------------|--------------|----------------|------------------|-------------|
| HIST1H2BK     | 1.669983774  | 5.958765925    | 13.40517809  | 3.19E-38       | 6.72E-37         | 75.49374488 |
| FAM195A       | 1.062445958  | 2.548743473    | 13.39533309  | 3.58E-38       | 7.52E-37         | 75.37940605 |
| IDH2          | 1.178994252  | 6.078188306    | 13.38266146  | 4.15E-38       | 8.70E-37         | 75.23232975 |
| SLC9A3R1      | 1.680906715  | 6.76711769     | 13.37216543  | 4.70E-38       | 9.81E-37         | 75.11058245 |
| COL14A1       | -1.984143207 | 3.279047148    | -13.34897946 | 6.15E-38       | 1.28E-36         | 74.84188869 |
| BCAS4         | 1.196246116  | 2.117278562    | 13.34683502  | 6.31E-38       | 1.31E-36         | 74.81705488 |
| APOD          | -3.14421862  | 5.92023395     | -13.33050709 | 7.63E-38       | 1.58E-36         | 74.62806465 |
| C19orf48      | 1.031466127  | 4.004571213    | 13.32932588  | 7.73E-38       | 1.60E-36         | 74.61439908 |
| EXOSC4        | 1.166782053  | 3.990733029    | 13.31914249  | 8.71E-38       | 1.80E-36         | 74.4966237  |
| GNG7          | -1.056703081 | 1.796886527    | -13.29647664 | 1.13E-37       | 2.34E-36         | 74.23472099 |
| PLTP          | -1.385653859 | 4.596160977    | -13.29422907 | 1.16E-37       | 2.39E-36         | 74.20876843 |
| ABRACL        | 1.198553741  | 4.853871652    | 13.28675251  | 1.27E-37       | 2.61E-36         | 74.12246001 |
| MAP1B         | -1.219648178 | 2.434430533    | -13.27902965 | 1.39E-37       | 2.85E-36         | 74.03334606 |
| RPS6KA3       | -1.006169896 | 2.400948754    | -13.2714597  | 1.51E-37       | 3.11E-36         | 73.94603356 |
| MCM10         | 1.208480809  | 1.491154318    | 13.27068765  | 1.53E-37       | 3.13E-36         | 73.93713075 |
| TMEM141       | 1.046371737  | 5.178224759    | 13.26350126  | 1.66E-37       | 3.40E-36         | 73.85427982 |
| C1orf233      | 1.268063088  | 2.975315986    | 13.25448553  | 1.84E-37       | 3.76E-36         | 73.75038545 |
| PDZRN3        | -1.165456463 | 2.439173122    | -13.25398785 | 1.85E-37       | 3.79E-36         | 73.74465188 |
| LGR4          | -1.328914601 | 2.43625751     | -13.24743528 | 2.00E-37       | 4.08E-36         | 73.6691771  |
| ANKRD65       | -1.113201598 | 1.711354358    | -13.24018993 | 2.18E-37       | 4.43E-36         | 73.58575476 |
| COX6C         | 2.00345498   | 6.675463145    | 13.23843927  | 2.22E-37       | 4.51E-36         | 73.56560281 |
| MICAL2        | 1.042558665  | 2.706487854    | 13.22923505  | 2.47E-37       | 5.01E-36         | 73.45968522 |
| RGMA          | -1.124064241 | 1.060010134    | -13.15593266 | 5.76E-37       | 1.15E-35         | 72.61810433 |
| S100A14       | 2.492536648  | 6.527262832    | 13.14484319  | 6.55E-37       | 1.31E-35         | 72.49108862 |

| <b>Symbol</b> | <b>logFC</b> | <b>AveExpr</b> | <b>t</b>     | <b>P.Value</b> | <b>adj.P.Val</b> | <b>B</b>    |
|---------------|--------------|----------------|--------------|----------------|------------------|-------------|
| TIPARP        | -1.048562443 | 3.110728916    | -13.14126212 | 6.82E-37       | 1.36E-35         | 72.45008896 |
| IFI6          | 2.36651486   | 7.586902669    | 13.09662615  | 1.14E-36       | 2.27E-35         | 71.93974931 |
| NOV           | -1.284150921 | 1.869170537    | -13.08333137 | 1.33E-36       | 2.63E-35         | 71.78799473 |
| KCNJ8         | -1.07767521  | 2.294061987    | -13.06548278 | 1.63E-36       | 3.22E-35         | 71.58444072 |
| MFSD3         | 1.234428525  | 3.787085499    | 13.05834572  | 1.77E-36       | 3.49E-35         | 71.50310404 |
| ALYREF        | 1.04854723   | 5.081732122    | 13.04962835  | 1.95E-36       | 3.85E-35         | 71.40380261 |
| NES           | -1.375979856 | 3.744613471    | -13.04626557 | 2.03E-36       | 3.99E-35         | 71.36550973 |
| LDHD          | -1.281602758 | 1.787287048    | -13.04210926 | 2.13E-36       | 4.18E-35         | 71.31819079 |
| MIF           | 1.44693597   | 4.792645436    | 13.03514414  | 2.31E-36       | 4.53E-35         | 71.23891919 |
| PTGS2         | -1.2246988   | 0.768210261    | -13.03481129 | 2.32E-36       | 4.54E-35         | 71.23513182 |
| TUBB6         | -1.205132896 | 3.733360595    | -13.01579425 | 2.88E-36       | 5.63E-35         | 71.01885975 |
| CNIH2         | 1.169131516  | 1.391603031    | 13.0058632   | 3.22E-36       | 6.29E-35         | 70.90601216 |
| PDE8B         | -1.005742445 | 1.239055972    | -12.99866569 | 3.50E-36       | 6.82E-35         | 70.82426635 |
| MATN3         | 1.69170256   | 2.648372181    | 12.99449644  | 3.67E-36       | 7.13E-35         | 70.77692942 |
| SERPING1      | -1.345165881 | 6.170332914    | -12.99162956 | 3.79E-36       | 7.37E-35         | 70.74438605 |
| LRRC45        | 1.054131418  | 2.934302271    | 12.99050953  | 3.84E-36       | 7.46E-35         | 70.73167346 |
| FOLR2         | -1.529778768 | 2.712138636    | -12.97910998 | 4.38E-36       | 8.48E-35         | 70.60233283 |
| RASD1         | -1.944333837 | 3.248220371    | -12.97183637 | 4.76E-36       | 9.20E-35         | 70.51984995 |
| SLC39A11      | 1.137260588  | 3.957921205    | 12.95430658  | 5.81E-36       | 1.12E-34         | 70.32120405 |
| EDN1          | -1.527464586 | 2.486895348    | -12.94581484 | 6.40E-36       | 1.23E-34         | 70.22504884 |
| PRR11         | 1.354823118  | 2.079691889    | 12.93901057  | 6.91E-36       | 1.33E-34         | 70.1480355  |
| STARD10       | 1.773354255  | 5.224618458    | 12.93490525  | 7.24E-36       | 1.39E-34         | 70.10158456 |
| CHTF18        | 1.021886394  | 2.011116524    | 12.93475568  | 7.26E-36       | 1.39E-34         | 70.09989246 |
| CPXM2         | -1.371453892 | 2.685116552    | -12.93041776 | 7.62E-36       | 1.46E-34         | 70.05082217 |



| <b>Symbol</b> | <b>logFC</b> | <b>AveExpr</b> | <b>t</b>     | <b>P.Value</b> | <b>adj.P.Val</b> | <b>B</b>    |
|---------------|--------------|----------------|--------------|----------------|------------------|-------------|
| HIST1H3H      | 2.004939172  | 2.367830305    | 12.90407315  | 1.03E-35       | 1.96E-34         | 69.75307861 |
| ABHD17C       | 1.065624761  | 3.097628827    | 12.90292481  | 1.04E-35       | 1.99E-34         | 69.74011055 |
| ETV5          | -1.007796257 | 2.121797072    | -12.89650478 | 1.12E-35       | 2.14E-34         | 69.66762616 |
| PXDC1         | -1.17729344  | 3.559997948    | -12.89633905 | 1.12E-35       | 2.14E-34         | 69.66575536 |
| CRTAC1        | -1.080195266 | 0.700044829    | -12.89570214 | 1.13E-35       | 2.15E-34         | 69.65856588 |
| PHLDB2        | -1.023408674 | 1.836913349    | -12.89290299 | 1.17E-35       | 2.22E-34         | 69.62697244 |
| CTSG          | -1.271979208 | 1.080620291    | -12.88929666 | 1.22E-35       | 2.31E-34         | 69.58627605 |
| RP4-631H13.6  | -1.261998723 | 1.682508809    | -12.88793014 | 1.24E-35       | 2.35E-34         | 69.5708575  |
| ABLIM3        | -1.477327021 | 2.371695747    | -12.87961217 | 1.36E-35       | 2.58E-34         | 69.47703175 |
| TAGLN         | -1.540786497 | 6.061289882    | -12.87853846 | 1.37E-35       | 2.61E-34         | 69.4649237  |
| CDCA2         | 1.137937405  | 1.46326853     | 12.87276215  | 1.47E-35       | 2.78E-34         | 69.39979851 |
| DOC2B         | -1.145110625 | 1.420979578    | -12.87038638 | 1.51E-35       | 2.85E-34         | 69.37301909 |
| KLF2          | -1.378618742 | 3.815527799    | -12.86947378 | 1.52E-35       | 2.88E-34         | 69.36273345 |
| ACKR3         | -1.387318894 | 3.621769194    | -12.85856432 | 1.72E-35       | 3.26E-34         | 69.23981778 |
| S100P         | 3.016230423  | 3.62658549     | 12.85746696  | 1.75E-35       | 3.30E-34         | 69.22745827 |
| TRAF4         | 1.04332521   | 4.262793345    | 12.82955751  | 2.39E-35       | 4.50E-34         | 68.91338279 |
| SOCS2         | -1.280836091 | 1.662082031    | -12.81502935 | 2.82E-35       | 5.29E-34         | 68.75009535 |
| PTK6          | 1.378470409  | 2.688688405    | 12.80758978  | 3.07E-35       | 5.75E-34         | 68.66653314 |
| TRIM2         | -1.344876713 | 2.154249524    | -12.76908272 | 4.74E-35       | 8.82E-34         | 68.23460217 |
| NR4A1         | -1.736607701 | 2.845110975    | -12.76541777 | 4.94E-35       | 9.18E-34         | 68.19354387 |
| N4BP3         | 1.181461221  | 2.552576445    | 12.7634558   | 5.05E-35       | 9.38E-34         | 68.17156763 |
| CFH           | -1.184982519 | 2.72671538     | -12.74748577 | 6.05E-35       | 1.12E-33         | 67.99278053 |
| CYR61         | -1.694779821 | 5.951390503    | -12.74154448 | 6.46E-35       | 1.20E-33         | 67.92631001 |
| GSPT2         | -1.089925954 | 1.823335666    | -12.72866593 | 7.47E-35       | 1.38E-33         | 67.78230667 |

| <b>Symbol</b>  | <b>logFC</b> | <b>AveExpr</b> | <b>t</b>     | <b>P.Value</b> | <b>adj.P.Val</b> | <b>B</b>    |
|----------------|--------------|----------------|--------------|----------------|------------------|-------------|
| FGFBP1         | -1.373518885 | 0.618868709    | -12.71266838 | 8.95E-35       | 1.65E-33         | 67.6035811  |
| CAMSAP3        | 1.022263229  | 3.088085008    | 12.7043069   | 9.83E-35       | 1.81E-33         | 67.5102338  |
| GSTM2          | -1.083547087 | 1.42780899     | -12.69578874 | 1.08E-34       | 1.99E-33         | 67.41518525 |
| ERBB3          | 1.31854637   | 5.280937334    | 12.68018765  | 1.29E-34       | 2.36E-33         | 67.24122808 |
| COL5A1         | 1.651070004  | 4.990025472    | 12.66056251  | 1.61E-34       | 2.93E-33         | 67.02263183 |
| CCDC80         | -1.654654928 | 3.841984969    | -12.60947856 | 2.84E-34       | 5.13E-33         | 66.45483452 |
| OGFRL1         | -1.147766267 | 3.269955205    | -12.60866346 | 2.87E-34       | 5.18E-33         | 66.44578892 |
| C1orf115       | -1.503348381 | 3.701007596    | -12.59887898 | 3.20E-34       | 5.77E-33         | 66.33723903 |
| ADM            | -1.475626037 | 2.104855368    | -12.59183358 | 3.46E-34       | 6.23E-33         | 66.25911645 |
| MT1L           | -1.436962141 | 1.974838782    | -12.5861665  | 3.69E-34       | 6.63E-33         | 66.19630139 |
| AC093668.2     | -1.046885009 | 1.598695522    | -12.57764818 | 4.05E-34       | 7.29E-33         | 66.10192324 |
| CTD-2510F5.4   | 1.497272733  | 2.423463949    | 12.57250249  | 4.29E-34       | 7.70E-33         | 66.04493536 |
| DHRS3          | -1.066431238 | 3.989460119    | -12.57084094 | 4.37E-34       | 7.84E-33         | 66.02653773 |
| RP11-196G18.22 | 1.035686525  | 2.035234469    | 12.54542182  | 5.80E-34       | 1.04E-32         | 65.74531368 |
| AC005152.3     | -2.050830183 | 1.289219857    | -12.53999531 | 6.17E-34       | 1.10E-32         | 65.6853337  |
| FMNL2          | -1.063546893 | 2.519645929    | -12.53300243 | 6.66E-34       | 1.19E-32         | 65.60806965 |
| FAM173A        | 1.164891097  | 2.72817209     | 12.51906464  | 7.78E-34       | 1.38E-32         | 65.45416982 |
| SIX4           | 1.001029163  | 1.972131462    | 12.50438747  | 9.16E-34       | 1.62E-32         | 65.29224708 |
| SCT            | 1.062782438  | 1.12597666     | 12.49592753  | 1.01E-33       | 1.78E-32         | 65.19898042 |
| IL4I1          | 1.35959588   | 1.977927182    | 12.49019366  | 1.07E-33       | 1.89E-32         | 65.13579492 |
| PELI1          | -1.022633649 | 2.994179217    | -12.44810353 | 1.71E-33       | 2.99E-32         | 64.6726529  |
| SYNE4          | 1.096895695  | 2.921641097    | 12.44566408  | 1.76E-33       | 3.07E-32         | 64.64584695 |
| KRT14          | -3.384234267 | 4.08084505     | -12.43377531 | 2.00E-33       | 3.50E-32         | 64.51526438 |
| KIFC2          | 1.213248875  | 2.305327093    | 12.42224271  | 2.27E-33       | 3.97E-32         | 64.38868523 |

| <b>Symbol</b> | <b>logFC</b> | <b>AveExpr</b> | <b>t</b>     | <b>P.Value</b> | <b>adj.P.Val</b> | <b>B</b>    |
|---------------|--------------|----------------|--------------|----------------|------------------|-------------|
| ANXA3         | -1.517305793 | 2.328596535    | -12.40489047 | 2.75E-33       | 4.79E-32         | 64.1984008  |
| FILIP1L       | -1.132474894 | 2.859920264    | -12.38561181 | 3.41E-33       | 5.92E-32         | 63.98723054 |
| ADRA2A        | -1.469212374 | 2.533658584    | -12.37195617 | 3.96E-33       | 6.86E-32         | 63.83780517 |
| C9orf116      | 1.198759621  | 2.245821296    | 12.35651779  | 4.69E-33       | 8.11E-32         | 63.66902477 |
| HIST1H3D      | 1.622010368  | 1.971713634    | 12.3455047   | 5.30E-33       | 9.14E-32         | 63.54872299 |
| BHLHE41       | -1.356211614 | 3.433475932    | -12.32078134 | 6.95E-33       | 1.19E-31         | 63.2789574  |
| DMTN          | -1.187919254 | 2.411026243    | -12.32025955 | 6.99E-33       | 1.20E-31         | 63.27326845 |
| SLC2A1        | 1.211996541  | 4.271453061    | 12.29327281  | 9.40E-33       | 1.61E-31         | 62.97929136 |
| RNF145        | -1.093981489 | 3.276849302    | -12.29294933 | 9.43E-33       | 1.61E-31         | 62.97577051 |
| CST1          | 2.532814804  | 2.464709503    | 12.28387016  | 1.04E-32       | 1.78E-31         | 62.87698126 |
| CYP39A1       | -1.03068036  | 0.966584605    | -12.28372682 | 1.04E-32       | 1.78E-31         | 62.87542205 |
| HOXC13        | 1.49217716   | 2.031750573    | 12.26881887  | 1.23E-32       | 2.09E-31         | 62.71333428 |
| TMEM97        | 1.161229793  | 3.524906759    | 12.24884982  | 1.53E-32       | 2.60E-31         | 62.49645733 |
| CAPN6         | -1.744653501 | 1.191602703    | -12.24171342 | 1.65E-32       | 2.81E-31         | 62.41901743 |
| ADCY5         | -1.341185293 | 1.332264036    | -12.22435672 | 2.00E-32       | 3.38E-31         | 62.2308189  |
| TRIM29        | -1.930576003 | 2.064753905    | -12.19908662 | 2.63E-32       | 4.44E-31         | 61.95718444 |
| SRMS          | 1.219367293  | 1.895437616    | 12.16821344  | 3.68E-32       | 6.17E-31         | 61.62347288 |
| TNFRSF18      | 1.508549992  | 2.301559481    | 12.15631205  | 4.19E-32       | 7.01E-31         | 61.4950044  |
| TMEM238       | 1.179874682  | 2.233889615    | 12.15400982  | 4.29E-32       | 7.18E-31         | 61.47016443 |
| SIAH2         | 1.285270362  | 5.002387556    | 12.1470892   | 4.63E-32       | 7.73E-31         | 61.3955162  |
| TSTD1         | 1.12721376   | 5.608550039    | 12.11179085  | 6.79E-32       | 1.13E-30         | 61.01528949 |
| MFGE8         | -1.489984689 | 4.249517962    | -12.10960224 | 6.95E-32       | 1.15E-30         | 60.99174253 |
| KRT5          | -3.166283158 | 3.875178686    | -12.09517152 | 8.13E-32       | 1.35E-30         | 60.836567   |
| CITED1        | -1.601389785 | 1.194934062    | -12.09063931 | 8.54E-32       | 1.41E-30         | 60.78786121 |

| <b>Symbol</b> | <b>logFC</b> | <b>AveExpr</b> | <b>t</b>     | <b>P.Value</b> | <b>adj.P.Val</b> | <b>B</b>    |
|---------------|--------------|----------------|--------------|----------------|------------------|-------------|
| C9orf142      | 1.032604117  | 4.234312185    | 12.06682273  | 1.10E-31       | 1.82E-30         | 60.53214764 |
| TM4SF18       | -1.242277078 | 2.523246284    | -11.97799703 | 2.88E-31       | 4.68E-30         | 59.58191135 |
| CREB3L1       | 1.584210158  | 3.708106891    | 11.96627157  | 3.26E-31       | 5.30E-30         | 59.45688466 |
| LEF1          | 1.174467012  | 2.213978024    | 11.96597603  | 3.27E-31       | 5.31E-30         | 59.45373457 |
| NT5E          | -1.028235855 | 2.279882574    | -11.96486299 | 3.31E-31       | 5.37E-30         | 59.4418716  |
| LIMCH1        | -1.197171005 | 2.886486987    | -11.96288173 | 3.38E-31       | 5.49E-30         | 59.42075717 |
| MIR4653       | 1.232419904  | 1.801062722    | 11.95555159  | 3.66E-31       | 5.93E-30         | 59.34266302 |
| PARM1         | -1.274629283 | 2.745460587    | -11.94879637 | 3.93E-31       | 6.37E-30         | 59.27072705 |
| LOXL1         | 1.188332918  | 3.773607173    | 11.94307748  | 4.18E-31       | 6.76E-30         | 59.20985181 |
| SCRN2         | -1.017575043 | 3.23826723     | -11.93307689 | 4.66E-31       | 7.52E-30         | 59.10345437 |
| BIK           | 1.384059857  | 3.493314926    | 11.9099473   | 5.96E-31       | 9.61E-30         | 58.85764349 |
| FZD7          | -1.283599683 | 3.626413887    | -11.90474841 | 6.30E-31       | 1.02E-29         | 58.80244342 |
| FSTL1         | -1.254568592 | 5.267797134    | -11.89477182 | 7.01E-31       | 1.13E-29         | 58.69656825 |
| POSTN         | 1.858898181  | 7.087649302    | 11.88350492  | 7.91E-31       | 1.27E-29         | 58.57708349 |
| PI15          | -2.136080577 | 1.647777609    | -11.84812232 | 1.15E-30       | 1.84E-29         | 58.20243115 |
| SYNDIG1       | 1.175963213  | 1.50669054     | 11.84426025  | 1.20E-30       | 1.91E-29         | 58.16159024 |
| AC009005.2    | 1.044880431  | 1.479905258    | 11.83087309  | 1.39E-30       | 2.20E-29         | 58.02010396 |
| CAPG          | 1.052032744  | 5.979293148    | 11.82163978  | 1.53E-30       | 2.43E-29         | 57.9225922  |
| FXVD3         | 1.502348149  | 5.607557354    | 11.80607737  | 1.80E-30       | 2.85E-29         | 57.75837515 |
| PPDPF         | 1.056648639  | 7.819710595    | 11.80546397  | 1.82E-30       | 2.87E-29         | 57.75190592 |
| NPR3          | -1.165061021 | 1.096627155    | -11.77947764 | 2.39E-30       | 3.77E-29         | 57.47808462 |
| DKK3          | -1.227798211 | 3.473828755    | -11.77589295 | 2.49E-30       | 3.91E-29         | 57.44034966 |
| NAV2          | -1.109153405 | 1.959337492    | -11.77323877 | 2.56E-30       | 4.02E-29         | 57.41241567 |
| AGPAT2        | -1.158652975 | 4.873586532    | -11.76338696 | 2.84E-30       | 4.46E-29         | 57.30877336 |

| <b>Symbol</b> | <b>logFC</b> | <b>AveExpr</b> | <b>t</b>     | <b>P.Value</b> | <b>adj.P.Val</b> | <b>B</b>    |
|---------------|--------------|----------------|--------------|----------------|------------------|-------------|
| TSPAN13       | 1.34461195   | 6.720870026    | 11.75900896  | 2.97E-30       | 4.67E-29         | 57.26273821 |
| SGCE          | -1.353904222 | 3.493622045    | -11.75698026 | 3.04E-30       | 4.76E-29         | 57.24141084 |
| SORD          | 1.242961126  | 3.031549259    | 11.74360824  | 3.50E-30       | 5.48E-29         | 57.10090537 |
| AK4           | -1.233486669 | 2.591663115    | -11.74072546 | 3.61E-30       | 5.64E-29         | 57.07063135 |
| SMC4          | 1.039025284  | 2.860717168    | 11.71913074  | 4.53E-30       | 7.06E-29         | 56.84403681 |
| CFAP45        | 1.026817197  | 1.403970733    | 11.71691069  | 4.64E-30       | 7.22E-29         | 56.82076039 |
| BOP1          | 1.109394876  | 3.874119119    | 11.70792618  | 5.10E-30       | 7.93E-29         | 56.72659662 |
| HIST1H4H      | 1.954521117  | 3.402757132    | 11.69258081  | 6.00E-30       | 9.30E-29         | 56.56589867 |
| WNT11         | -1.36732238  | 1.299346608    | -11.69237968 | 6.01E-30       | 9.32E-29         | 56.5637935  |
| MMP9          | 2.157298247  | 4.287832755    | 11.68098125  | 6.78E-30       | 1.05E-28         | 56.44453772 |
| PRRT3         | 1.117794501  | 2.153527891    | 11.65808521  | 8.63E-30       | 1.33E-28         | 56.20526644 |
| MUC1          | 2.237020132  | 5.99448124     | 11.65559374  | 8.85E-30       | 1.37E-28         | 56.17925219 |
| IGF2          | -1.734987337 | 3.548773787    | -11.64374902 | 1.00E-29       | 1.54E-28         | 56.05563766 |
| ST14          | 1.102338528  | 5.062927633    | 11.63979398  | 1.05E-29       | 1.61E-28         | 56.01438402 |
| METRN         | 1.538012301  | 3.382077288    | 11.63325963  | 1.12E-29       | 1.72E-28         | 55.94625081 |
| CORO2A        | 1.072007704  | 3.156761649    | 11.60691885  | 1.48E-29       | 2.26E-28         | 55.67190503 |
| PTX3          | -1.427995214 | 1.12085982     | -11.55830794 | 2.46E-29       | 3.73E-28         | 55.16690628 |
| NCOA7         | -1.131090017 | 2.682840813    | -11.55545763 | 2.53E-29       | 3.84E-28         | 55.13734781 |
| HIST1H2BH     | 1.415009601  | 1.846386001    | 11.53812888  | 3.03E-29       | 4.59E-28         | 54.95776902 |
| MBOAT2        | 1.076107664  | 3.171936531    | 11.50633499  | 4.22E-29       | 6.35E-28         | 54.62884476 |
| MAPK8IP2      | 1.398070367  | 2.184164382    | 11.45665222  | 7.08E-29       | 1.06E-27         | 54.11629915 |
| CXCL11        | 1.730019922  | 2.177566873    | 11.42794812  | 9.53E-29       | 1.42E-27         | 53.82098371 |
| FGL2          | -1.22929654  | 2.974538984    | -11.4026671  | 1.24E-28       | 1.83E-27         | 53.56137622 |
| PALM          | -1.194570905 | 2.845917514    | -11.3793215  | 1.58E-28       | 2.32E-27         | 53.32205167 |

| <b>Symbol</b> | <b>logFC</b> | <b>AveExpr</b> | <b>t</b>     | <b>P.Value</b> | <b>adj.P.Val</b> | <b>B</b>    |
|---------------|--------------|----------------|--------------|----------------|------------------|-------------|
| PCAT6         | 1.036193718  | 2.634630808    | 11.36056426  | 1.91E-28       | 2.81E-27         | 53.13004858 |
| TUBB2B        | -1.339085507 | 1.313867011    | -11.33611321 | 2.46E-28       | 3.60E-27         | 52.88014348 |
| CCDC78        | 1.014138978  | 1.161844383    | 11.33327902  | 2.53E-28       | 3.71E-27         | 52.85120421 |
| FAP           | 1.157577508  | 2.55034599     | 11.327269    | 2.69E-28       | 3.94E-27         | 52.78985651 |
| HIST1H1PS1    | 1.557330175  | 1.941545459    | 11.32361287  | 2.80E-28       | 4.08E-27         | 52.75254897 |
| HIST1H2AD     | 1.399851405  | 1.641900101    | 11.30546011  | 3.37E-28       | 4.90E-27         | 52.56745966 |
| TAT           | -2.417197318 | 1.390354406    | -11.28948033 | 3.97E-28       | 5.76E-27         | 52.40472387 |
| PVRL4         | 1.165726778  | 4.366437577    | 11.28742772  | 4.06E-28       | 5.87E-27         | 52.38383376 |
| LGR6          | -1.394661884 | 1.214275421    | -11.27879527 | 4.43E-28       | 6.41E-27         | 52.2960119  |
| KLK5          | -2.363653272 | 2.045244502    | -11.27081051 | 4.81E-28       | 6.95E-27         | 52.21482731 |
| HSH2D         | 1.41090838   | 2.250949523    | 11.26208803  | 5.26E-28       | 7.59E-27         | 52.12619486 |
| FKBP10        | 1.038008245  | 5.059251596    | 11.24394933  | 6.33E-28       | 9.11E-27         | 51.94205727 |
| SULF1         | 1.399909081  | 4.480122849    | 11.23779471  | 6.74E-28       | 9.69E-27         | 51.87963204 |
| SLC7A5        | 1.715209354  | 3.923162022    | 11.23687942  | 6.81E-28       | 9.78E-27         | 51.87035071 |
| EFNB3         | -1.007402124 | 1.407880937    | -11.22418461 | 7.75E-28       | 1.11E-26         | 51.74168488 |
| ANKRD22       | 1.136280499  | 1.984017539    | 11.21206478  | 8.77E-28       | 1.25E-26         | 51.61895589 |
| C16orf89      | -1.853366131 | 1.968387902    | -11.20228018 | 9.69E-28       | 1.38E-26         | 51.51995213 |
| ERRFI1        | -1.090019663 | 4.157682776    | -11.20059131 | 9.86E-28       | 1.41E-26         | 51.50287057 |
| ZNF467        | 1.05332879   | 2.950558156    | 11.20000522  | 9.92E-28       | 1.42E-26         | 51.49694323 |
| LDHB          | -1.57343435  | 5.477807065    | -11.19092266 | 1.09E-27       | 1.55E-26         | 51.40512038 |
| COL5A2        | 1.526751352  | 5.679148062    | 11.18200072  | 1.19E-27       | 1.69E-26         | 51.31497971 |
| ITGA6         | -1.237028042 | 4.137358693    | -11.1782806  | 1.24E-27       | 1.76E-26         | 51.27741149 |
| FMOD          | -1.627837399 | 4.939536252    | -11.16906778 | 1.36E-27       | 1.93E-26         | 51.18441791 |
| GOLT1A        | 1.106280807  | 2.494697703    | 11.16683832  | 1.39E-27       | 1.97E-26         | 51.16192317 |

| <b>Symbol</b>  | <b>logFC</b> | <b>AveExpr</b> | <b>t</b>     | <b>P.Value</b> | <b>adj.P.Val</b> | <b>B</b>    |
|----------------|--------------|----------------|--------------|----------------|------------------|-------------|
| TIMP1          | 1.044873317  | 7.401018437    | 11.16647623  | 1.40E-27       | 1.98E-26         | 51.15827018 |
| RARRES2        | -1.383476708 | 4.27325064     | -11.15102282 | 1.63E-27       | 2.31E-26         | 51.00245265 |
| CST2           | 1.470384273  | 1.495097923    | 11.14109308  | 1.81E-27       | 2.55E-26         | 50.90242251 |
| CEMIP          | 1.159190953  | 1.482248403    | 11.13542     | 1.91E-27       | 2.70E-26         | 50.84530542 |
| RASL11A        | -1.015268516 | 2.095910295    | -11.12582222 | 2.11E-27       | 2.97E-26         | 50.74872759 |
| PDGFRL         | -1.189844483 | 3.304428273    | -11.09666038 | 2.83E-27       | 3.97E-26         | 50.4556994  |
| PRSS22         | 1.030111229  | 2.511322426    | 11.09262731  | 2.95E-27       | 4.13E-26         | 50.41522264 |
| SMKR1          | 1.024092     | 1.813427249    | 11.08403942  | 3.22E-27       | 4.50E-26         | 50.32907252 |
| PRR15L         | 1.437302006  | 4.682681545    | 11.07927335  | 3.38E-27       | 4.71E-26         | 50.28128469 |
| KLK7           | -1.761540619 | 1.286492682    | -11.07087405 | 3.68E-27       | 5.12E-26         | 50.19710805 |
| IL34           | -1.344813807 | 1.94983309     | -11.06032464 | 4.09E-27       | 5.69E-26         | 50.09145657 |
| RP11-347C12.10 | 1.003237455  | 2.325166093    | 11.05170951  | 4.46E-27       | 6.19E-26         | 50.00523725 |
| INHBB          | -1.358966205 | 3.363533438    | -11.04873538 | 4.60E-27       | 6.37E-26         | 49.9754851  |
| YBX3           | -1.133947682 | 3.704165129    | -11.04658703 | 4.70E-27       | 6.51E-26         | 49.95399786 |
| AL031587.1     | -1.062250154 | 2.377165888    | -11.04065849 | 4.99E-27       | 6.90E-26         | 49.89471959 |
| DNAJC1         | 1.094579471  | 4.850337206    | 11.03682184  | 5.18E-27       | 7.17E-26         | 49.85637154 |
| HOXC11         | 1.263260114  | 1.459535211    | 11.01595232  | 6.40E-27       | 8.83E-26         | 49.64796571 |
| IL1R1          | -1.147830841 | 3.36585779     | -11.0116549  | 6.68E-27       | 9.20E-26         | 49.60509089 |
| MB             | 1.32986815   | 3.333377663    | 11.01062948  | 6.75E-27       | 9.30E-26         | 49.59486238 |
| RAMP1          | 1.767357104  | 2.970659639    | 10.9920233   | 8.14E-27       | 1.12E-25         | 49.40940154 |
| DEFB1          | -1.891255233 | 1.97403542     | -10.9888401  | 8.40E-27       | 1.15E-25         | 49.37769792 |
| MANEAL         | 1.050417897  | 2.680323587    | 10.97310461  | 9.84E-27       | 1.35E-25         | 49.22108707 |
| LTBP2          | -1.177133276 | 4.241193864    | -10.96101734 | 1.11E-26       | 1.52E-25         | 49.10090982 |
| COMTD1         | 1.045083418  | 2.541769035    | 10.95353501  | 1.20E-26       | 1.63E-25         | 49.02657103 |

| <b>Symbol</b> | <b>logFC</b> | <b>AveExpr</b> | <b>t</b>     | <b>P.Value</b> | <b>adj.P.Val</b> | <b>B</b>    |
|---------------|--------------|----------------|--------------|----------------|------------------|-------------|
| ALB           | -1.728162586 | 0.903565429    | -10.9404699  | 1.36E-26       | 1.86E-25         | 48.89686508 |
| HIST1H2BC     | 1.538298382  | 2.61367619     | 10.93858079  | 1.39E-26       | 1.89E-25         | 48.87812108 |
| SLC39A4       | 1.052807853  | 2.18164939     | 10.93233307  | 1.48E-26       | 2.01E-25         | 48.81614906 |
| CYBRD1        | -1.536675656 | 5.436151812    | -10.9224272  | 1.63E-26       | 2.22E-25         | 48.7179504  |
| IBSP          | 1.117215084  | 1.041874327    | 10.91326511  | 1.79E-26       | 2.43E-25         | 48.62718965 |
| HIST2H2BE     | 1.474868219  | 4.567984405    | 10.90505285  | 1.94E-26       | 2.63E-25         | 48.54589077 |
| CCL13         | -1.207966249 | 1.128330266    | -10.90097176 | 2.02E-26       | 2.73E-25         | 48.50550773 |
| EFNA4         | 1.075869401  | 4.051646474    | 10.89580269  | 2.13E-26       | 2.88E-25         | 48.45437667 |
| MUC15         | -1.393814603 | 1.102269665    | -10.89110302 | 2.23E-26       | 3.01E-25         | 48.40790595 |
| TPTEP1        | -1.041302753 | 1.141337398    | -10.86112869 | 3.01E-26       | 4.04E-25         | 48.1119024  |
| FAT1          | -1.258319813 | 3.163472311    | -10.8580874  | 3.10E-26       | 4.17E-25         | 48.08190615 |
| S100A11       | 1.032479988  | 9.261860262    | 10.84383727  | 3.58E-26       | 4.79E-25         | 47.9414485  |
| NKAIN1        | 2.192582066  | 2.719449204    | 10.82442251  | 4.34E-26       | 5.79E-25         | 47.75032784 |
| MMP1          | 2.201231892  | 2.263545488    | 10.79343225  | 5.89E-26       | 7.84E-25         | 47.44583746 |
| ZNF521        | -1.015791593 | 2.201859778    | -10.78329093 | 6.52E-26       | 8.65E-25         | 47.34635061 |
| ACSL5         | -1.029954934 | 2.577181386    | -10.77598018 | 7.00E-26       | 9.28E-25         | 47.27467921 |
| CBLC          | 1.229690814  | 3.430319168    | 10.77218353  | 7.27E-26       | 9.62E-25         | 47.23747428 |
| TNNT1         | 2.152391742  | 2.642260723    | 10.77201044  | 7.29E-26       | 9.64E-25         | 47.2357783  |
| KRT15         | -2.417722624 | 3.348705313    | -10.75282505 | 8.80E-26       | 1.16E-24         | 47.04793945 |
| TFAP2A        | 1.014338078  | 3.829008601    | 10.70867811  | 1.36E-25       | 1.78E-24         | 46.61675226 |
| OLFM4         | -1.982016604 | 1.356133211    | -10.69830165 | 1.51E-25       | 1.97E-24         | 46.51561578 |
| PYCARD        | 1.354346135  | 4.118523113    | 10.6860971   | 1.70E-25       | 2.21E-24         | 46.39676454 |
| SORBS2        | -1.059113642 | 1.894153598    | -10.67940904 | 1.81E-25       | 2.36E-24         | 46.33168173 |
| NME3          | 1.146944571  | 4.894594925    | 10.67893317  | 1.82E-25       | 2.37E-24         | 46.32705215 |



| <b>Symbol</b> | <b>logFC</b> | <b>AveExpr</b> | <b>t</b>     | <b>P.Value</b> | <b>adj.P.Val</b> | <b>B</b>    |
|---------------|--------------|----------------|--------------|----------------|------------------|-------------|
| APOBEC3B      | 1.286777975  | 2.118555942    | 10.66492589  | 2.09E-25       | 2.71E-24         | 46.19085805 |
| MIR205        | -1.144868573 | 0.986500484    | -10.65321267 | 2.34E-25       | 3.04E-24         | 46.07708228 |
| HPN           | 1.575192     | 3.226989658    | 10.63895311  | 2.70E-25       | 3.48E-24         | 45.93871151 |
| CLPSL2        | 1.141992133  | 1.32573034     | 10.63009509  | 2.94E-25       | 3.79E-24         | 45.85283265 |
| PTGDS         | -1.626839347 | 2.726738689    | -10.61206325 | 3.51E-25       | 4.51E-24         | 45.67819537 |
| CTSD          | 1.096888875  | 8.037375309    | 10.59772705  | 4.03E-25       | 5.17E-24         | 45.53952446 |
| FCER1A        | -1.139166101 | 1.520604995    | -10.59625027 | 4.09E-25       | 5.25E-24         | 45.52524869 |
| TWIST1        | -1.065868086 | 2.150436619    | -10.59230213 | 4.25E-25       | 5.45E-24         | 45.48709067 |
| EPS8L1        | 1.038865823  | 2.771051504    | 10.58959368  | 4.37E-25       | 5.59E-24         | 45.46092088 |
| TMC4          | 1.30216534   | 4.823583799    | 10.5766033   | 4.95E-25       | 6.33E-24         | 45.33548079 |
| CAPS          | 1.298675883  | 2.96001441     | 10.57330122  | 5.12E-25       | 6.54E-24         | 45.30361499 |
| AIF1L         | -1.39808905  | 3.159264813    | -10.55789309 | 5.94E-25       | 7.57E-24         | 45.15503132 |
| BSPRY         | 1.071474572  | 4.348630858    | 10.55537797  | 6.09E-25       | 7.76E-24         | 45.13079444 |
| PPM1J         | 1.032409175  | 1.88688659     | 10.55048248  | 6.39E-25       | 8.13E-24         | 45.08363299 |
| RNF39         | -1.029381933 | 1.775177669    | -10.53619005 | 7.34E-25       | 9.32E-24         | 44.94604811 |
| GUCY1A3       | -1.073135051 | 2.639300981    | -10.52396465 | 8.26E-25       | 1.05E-23         | 44.82848369 |
| NFIX          | -1.173452149 | 4.370254324    | -10.51968448 | 8.61E-25       | 1.09E-23         | 44.78735045 |
| HRCT1         | -1.506306997 | 1.486281649    | -10.50256572 | 1.02E-24       | 1.28E-23         | 44.62297444 |
| SERPINF1      | -1.228139429 | 5.666272019    | -10.50188269 | 1.02E-24       | 1.29E-23         | 44.61642053 |
| PKP1          | -1.721413875 | 1.99906828     | -10.49984704 | 1.04E-24       | 1.31E-23         | 44.59688981 |
| TNS4          | -1.588850576 | 2.439507654    | -10.49803552 | 1.06E-24       | 1.34E-23         | 44.57951216 |
| TCF7L1        | -1.229602527 | 2.776958038    | -10.4859303  | 1.19E-24       | 1.50E-23         | 44.46345179 |
| IRX5          | 1.010922735  | 4.107640313    | 10.48231638  | 1.24E-24       | 1.55E-23         | 44.42882438 |
| CTD-2562J17.6 | -1.114005908 | 3.192423725    | -10.4492979  | 1.70E-24       | 2.12E-23         | 44.11290993 |

| <b>Symbol</b> | <b>logFC</b> | <b>AveExpr</b> | <b>t</b>     | <b>P.Value</b> | <b>adj.P.Val</b> | <b>B</b>    |
|---------------|--------------|----------------|--------------|----------------|------------------|-------------|
| AC016735.2    | -1.032366608 | 0.77221112     | -10.4490082  | 1.71E-24       | 2.13E-23         | 44.11014174 |
| PTGER3        | -1.29809423  | 1.94589941     | -10.44515847 | 1.77E-24       | 2.20E-23         | 44.07336286 |
| PROM2         | 1.040718356  | 4.277900582    | 10.43581344  | 1.94E-24       | 2.41E-23         | 43.98413074 |
| FOLR1         | -1.777675532 | 1.645984725    | -10.42415938 | 2.17E-24       | 2.69E-23         | 43.87294344 |
| PDLIM4        | -1.091980767 | 2.590346601    | -10.41009079 | 2.48E-24       | 3.07E-23         | 43.73885726 |
| ARID5A        | -1.023586579 | 3.444122543    | -10.39941445 | 2.75E-24       | 3.39E-23         | 43.63720258 |
| SLC6A14       | -1.384966969 | 0.985623973    | -10.39312994 | 2.92E-24       | 3.59E-23         | 43.57740525 |
| PMAIP1        | 1.19986279   | 2.724381864    | 10.38819191  | 3.06E-24       | 3.77E-23         | 43.53044068 |
| MRPL12        | 1.060460522  | 3.887413209    | 10.38279986  | 3.22E-24       | 3.96E-23         | 43.47917934 |
| SPP1          | 1.862614952  | 5.807503544    | 10.33871712  | 4.92E-24       | 5.99E-23         | 43.06092153 |
| RNASE1        | -1.173952494 | 5.877456264    | -10.33569382 | 5.06E-24       | 6.16E-23         | 43.03229066 |
| HIST1H2BG     | 1.563829316  | 2.614330874    | 10.32089896  | 5.83E-24       | 7.08E-23         | 42.89228276 |
| MFAP5         | -1.396241018 | 3.436192112    | -10.28130468 | 8.51E-24       | 1.03E-22         | 42.5184134  |
| SOCS3         | -1.223266678 | 4.387740267    | -10.26878683 | 9.58E-24       | 1.15E-22         | 42.40046279 |
| PODXL2        | 1.259263551  | 4.106347228    | 10.26551001  | 9.88E-24       | 1.19E-22         | 42.36960646 |
| HIST1H2AI     | 1.375041204  | 1.458601797    | 10.25063357  | 1.14E-23       | 1.37E-22         | 42.22962508 |
| CTF1          | -1.01724632  | 2.085335583    | -10.25010332 | 1.14E-23       | 1.37E-22         | 42.22463877 |
| HIST1H1C      | 1.694459707  | 6.169271007    | 10.24463864  | 1.21E-23       | 1.45E-22         | 42.17326307 |
| GOLM1         | 1.122436962  | 5.627062773    | 10.19382221  | 1.95E-23       | 2.32E-22         | 41.69661366 |
| RAB31         | 1.214161554  | 4.687752779    | 10.16659921  | 2.52E-23       | 2.98E-22         | 41.4420824  |
| SLC28A3       | -1.167336242 | 1.090923187    | -10.1517196  | 2.90E-23       | 3.42E-22         | 41.30320094 |
| GEM           | -1.152290318 | 3.365686817    | -10.13173613 | 3.50E-23       | 4.12E-22         | 41.11695006 |
| BASP1         | 1.033490398  | 3.968320854    | 10.12606922  | 3.69E-23       | 4.34E-22         | 41.06418903 |
| FCGR3A        | 1.123792067  | 4.39597477     | 10.12416978  | 3.76E-23       | 4.41E-22         | 41.04651007 |

| <b>Symbol</b> | <b>logFC</b> | <b>AveExpr</b> | <b>t</b>     | <b>P.Value</b> | <b>adj.P.Val</b> | <b>B</b>    |
|---------------|--------------|----------------|--------------|----------------|------------------|-------------|
| FGFR1         | -1.114541254 | 3.365109685    | -10.12334608 | 3.79E-23       | 4.45E-22         | 41.03884437 |
| FAM129A       | -1.274764434 | 3.498807904    | -10.11527683 | 4.09E-23       | 4.78E-22         | 40.9637763  |
| CRABP2        | 1.759223608  | 8.110730653    | 10.11299817  | 4.17E-23       | 4.88E-22         | 40.94258713 |
| GABRP         | -2.592751024 | 2.796177303    | -10.11274364 | 4.18E-23       | 4.89E-22         | 40.94022053 |
| OLFML2B       | 1.009219992  | 4.118102722    | 10.09707898  | 4.85E-23       | 5.65E-22         | 40.79466656 |
| MMP3          | 1.419395718  | 2.310818603    | 10.07581954  | 5.92E-23       | 6.86E-22         | 40.59742973 |
| CPE           | -1.240098854 | 4.944200621    | -10.05739382 | 7.03E-23       | 8.12E-22         | 40.4267657  |
| NFIL3         | -1.002339077 | 3.470424097    | -10.05005981 | 7.53E-23       | 8.69E-22         | 40.35890906 |
| MYBPC1        | -1.732106585 | 1.103032692    | -10.04783935 | 7.68E-23       | 8.87E-22         | 40.33837289 |
| MAOB          | -2.033518861 | 4.096220525    | -10.04411539 | 7.96E-23       | 9.17E-22         | 40.30393995 |
| U47924.27     | 1.064980729  | 3.179969521    | 10.04151666  | 8.15E-23       | 9.39E-22         | 40.27991764 |
| KCNK6         | 1.015847142  | 3.106069003    | 10.03085791  | 9.00E-23       | 1.04E-21         | 40.18144429 |
| CNTD2         | 1.247163059  | 1.685622533    | 10.02996657  | 9.08E-23       | 1.04E-21         | 40.17321342 |
| ZMYND10       | 1.146447186  | 1.76927971     | 10.00151715  | 1.18E-22       | 1.36E-21         | 39.9108274  |
| PLA2G16       | -1.238538331 | 4.630252639    | -9.974078627 | 1.53E-22       | 1.74E-21         | 39.65835956 |
| C3            | -1.374432054 | 5.610912729    | -9.962190784 | 1.71E-22       | 1.94E-21         | 39.54915847 |
| C15orf48      | 1.506437764  | 3.59827985     | 9.950489839  | 1.90E-22       | 2.16E-21         | 39.44178148 |
| FOXD3-AS1     | 1.084395401  | 1.12826985     | 9.948155342  | 1.94E-22       | 2.20E-21         | 39.42037106 |
| ELF5          | -1.847658296 | 1.877017747    | -9.942296875 | 2.05E-22       | 2.32E-21         | 39.36665984 |
| IGHG4         | 2.398578764  | 5.11032781     | 9.929733481  | 2.30E-22       | 2.60E-21         | 39.25156699 |
| LYNX1         | -1.046148707 | 1.66015958     | -9.928782806 | 2.32E-22       | 2.62E-21         | 39.24286289 |
| PRR15         | 1.676010444  | 3.575770328    | 9.927643663  | 2.35E-22       | 2.65E-21         | 39.23243415 |
| DEGS2         | 1.68815828   | 3.363868636    | 9.912029737  | 2.71E-22       | 3.05E-21         | 39.08959217 |
| VCAN          | 1.316951448  | 4.393683823    | 9.891325016  | 3.28E-22       | 3.68E-21         | 38.90047072 |

| <b>Symbol</b> | <b>logFC</b> | <b>AveExpr</b> | <b>t</b>     | <b>P.Value</b> | <b>adj.P.Val</b> | <b>B</b>    |
|---------------|--------------|----------------|--------------|----------------|------------------|-------------|
| CLDN3         | 1.507691809  | 5.345984811    | 9.879253758  | 3.67E-22       | 4.10E-21         | 38.7903635  |
| HIST1H2BJ     | 1.084433246  | 1.698595723    | 9.874690352  | 3.83E-22       | 4.27E-21         | 38.7487683  |
| CLDN4         | 1.086320038  | 5.594050783    | 9.874591683  | 3.83E-22       | 4.28E-21         | 38.74786911 |
| STEAP4        | -1.506858987 | 2.241174132    | -9.869790098 | 4.00E-22       | 4.47E-21         | 38.70412085 |
| SCGB3A1       | -1.988859426 | 1.773870186    | -9.865675677 | 4.16E-22       | 4.64E-21         | 38.66664781 |
| HIST1H2AC     | 1.241109342  | 5.51197248     | 9.855490107  | 4.57E-22       | 5.09E-21         | 38.57393724 |
| PARD6B        | 1.359535794  | 2.851141035    | 9.842855238  | 5.13E-22       | 5.71E-21         | 38.45904547 |
| MYC           | -1.191196169 | 4.898171905    | -9.799826715 | 7.61E-22       | 8.40E-21         | 38.06871406 |
| ITPR1         | -1.0657742   | 2.661068802    | -9.796888648 | 7.82E-22       | 8.63E-21         | 38.04211439 |
| CMTM7         | -1.03905236  | 2.597764304    | -9.787880077 | 8.49E-22       | 9.34E-21         | 37.96059782 |
| KRT17         | -2.561271655 | 4.343382339    | -9.774546878 | 9.59E-22       | 1.05E-20         | 37.84006545 |
| HIST1H2AE     | 1.486655894  | 2.851080225    | 9.770627866  | 9.94E-22       | 1.09E-20         | 37.80466403 |
| HID1          | 1.175355993  | 4.373551534    | 9.770187014  | 9.98E-22       | 1.09E-20         | 37.80068246 |
| TPM2          | -1.164129654 | 4.625745601    | -9.76602827  | 1.04E-21       | 1.14E-20         | 37.7631301  |
| DSC3          | -1.427201047 | 1.478642225    | -9.761605057 | 1.08E-21       | 1.18E-20         | 37.72320454 |
| C4orf48       | 1.11673507   | 2.317684802    | 9.759194761  | 1.10E-21       | 1.21E-20         | 37.70145479 |
| EFNA3         | 1.135060469  | 2.760269816    | 9.755572153  | 1.14E-21       | 1.25E-20         | 37.66877409 |
| OASL          | 1.209830835  | 2.150976621    | 9.75166316   | 1.18E-21       | 1.29E-20         | 37.63352137 |
| PLEKHA4       | -1.064582457 | 3.009077703    | -9.747412249 | 1.23E-21       | 1.34E-20         | 37.59519875 |
| LAMC2         | -1.534967294 | 3.033916568    | -9.739268028 | 1.32E-21       | 1.44E-20         | 37.52181698 |
| TTC39A        | 1.221875575  | 3.432361409    | 9.737561836  | 1.34E-21       | 1.46E-20         | 37.50645031 |
| AMIGO2        | -1.384444857 | 3.259089863    | -9.733885615 | 1.39E-21       | 1.51E-20         | 37.4733485  |
| MIEN1         | 1.166641087  | 4.52568402     | 9.727461602  | 1.47E-21       | 1.60E-20         | 37.41553026 |
| IER3          | 1.231779024  | 5.847810073    | 9.724078713  | 1.52E-21       | 1.64E-20         | 37.38509618 |

| <b>Symbol</b> | <b>logFC</b> | <b>AveExpr</b> | <b>t</b>     | <b>P.Value</b> | <b>adj.P.Val</b> | <b>B</b>    |
|---------------|--------------|----------------|--------------|----------------|------------------|-------------|
| PM20D2        | -1.026157615 | 1.683911534    | -9.721871697 | 1.55E-21       | 1.68E-20         | 37.36524567 |
| LGALS3        | -1.006776568 | 5.973826749    | -9.713547126 | 1.67E-21       | 1.81E-20         | 37.29040666 |
| RPL39L        | 1.028752013  | 3.630208248    | 9.698123024  | 1.92E-21       | 2.07E-20         | 37.15188605 |
| IGJ           | -2.373917853 | 5.489960947    | -9.693605371 | 2.00E-21       | 2.16E-20         | 37.11134943 |
| HEY2          | -1.014747428 | 1.805400943    | -9.643099296 | 3.16E-21       | 3.38E-20         | 36.65925683 |
| FNDC1         | 1.273604895  | 3.057680209    | 9.630850214  | 3.53E-21       | 3.77E-20         | 36.54991551 |
| CDH11         | 1.030853367  | 3.134439081    | 9.627471735  | 3.64E-21       | 3.88E-20         | 36.51977841 |
| MZT2B         | 1.033375461  | 4.866911675    | 9.626344808  | 3.68E-21       | 3.92E-20         | 36.50972787 |
| MT-TF         | -1.190395891 | 1.422413258    | -9.602599346 | 4.55E-21       | 4.83E-20         | 36.29818651 |
| ID1           | -1.00551204  | 3.294275922    | -9.595876204 | 4.84E-21       | 5.13E-20         | 36.23837303 |
| FAM171A1      | -1.109840334 | 2.4756772      | -9.580916423 | 5.53E-21       | 5.85E-20         | 36.10540936 |
| MDK           | 1.223098924  | 5.832020584    | 9.572251541  | 5.98E-21       | 6.32E-20         | 36.02847629 |
| CELSR1        | 1.248338715  | 3.799848656    | 9.562337711  | 6.54E-21       | 6.89E-20         | 35.94052712 |
| ARHGAP36      | -1.063088543 | 0.460768322    | -9.553275147 | 7.09E-21       | 7.46E-20         | 35.86019801 |
| ME1           | -1.189384383 | 2.475875902    | -9.549703815 | 7.32E-21       | 7.69E-20         | 35.82856019 |
| MEX3A         | 1.21010903   | 2.617382723    | 9.517553797  | 9.76E-21       | 1.02E-19         | 35.54420431 |
| ZG16B         | 1.58386212   | 4.313255583    | 9.504167567  | 1.10E-20       | 1.15E-19         | 35.42604974 |
| TMEM63C       | 1.051268314  | 2.150790776    | 9.499513766  | 1.15E-20       | 1.19E-19         | 35.38500598 |
| TPPP3         | -1.134734517 | 2.675853166    | -9.483959274 | 1.32E-20       | 1.37E-19         | 35.24794959 |
| MUCL1         | -3.279223211 | 3.850084827    | -9.475538621 | 1.42E-20       | 1.47E-19         | 35.17383241 |
| GSTA1         | -1.343622375 | 0.877653868    | -9.449151364 | 1.79E-20       | 1.85E-19         | 34.94194183 |
| FBXO32        | -1.053414897 | 4.072059619    | -9.448611611 | 1.80E-20       | 1.86E-19         | 34.93720428 |
| WISP2         | -1.284237897 | 2.28620476     | -9.440155754 | 1.94E-20       | 2.00E-19         | 34.86301543 |
| COL1A2        | 1.423923543  | 8.180852326    | 9.436706254  | 2.00E-20       | 2.06E-19         | 34.83276705 |

| <b>Symbol</b> | <b>logFC</b> | <b>AveExpr</b> | <b>t</b>     | <b>P.Value</b> | <b>adj.P.Val</b> | <b>B</b>    |
|---------------|--------------|----------------|--------------|----------------|------------------|-------------|
| ANPEP         | -1.581509765 | 3.510609087    | -9.409591779 | 2.55E-20       | 2.61E-19         | 34.59533302 |
| CX3CR1        | -1.029024311 | 1.728678875    | -9.404183268 | 2.67E-20       | 2.74E-19         | 34.54804237 |
| RP1-34B20.4   | 1.115683531  | 1.318247967    | 9.383730745  | 3.20E-20       | 3.27E-19         | 34.36942198 |
| OAS3          | 1.093513563  | 3.741678633    | 9.340353494  | 4.69E-20       | 4.75E-19         | 33.99169762 |
| CFB           | 1.45765055   | 2.910898165    | 9.326982848  | 5.27E-20       | 5.32E-19         | 33.87557128 |
| FBXL16        | 1.249547138  | 2.701317136    | 9.29890092   | 6.75E-20       | 6.76E-19         | 33.63214163 |
| NR2F1         | -1.112335321 | 2.118717302    | -9.283419177 | 7.73E-20       | 7.72E-19         | 33.49820797 |
| EPYC          | 1.074914354  | 1.023043982    | 9.272315087  | 8.51E-20       | 8.49E-19         | 33.40226425 |
| TNFRSF12A     | 1.052725244  | 4.392151877    | 9.253288854  | 1.01E-19       | 9.99E-19         | 33.23810049 |
| LINGO1        | 1.160729508  | 1.937559734    | 9.224311189  | 1.29E-19       | 1.28E-18         | 32.98863249 |
| WNT7B         | 1.028928461  | 2.036529606    | 9.207104068  | 1.50E-19       | 1.48E-18         | 32.84081682 |
| CTD-2015G9.2  | -1.123518116 | 0.788285589    | -9.182187996 | 1.86E-19       | 1.83E-18         | 32.62720143 |
| HSPB1         | 1.218191794  | 7.805952593    | 9.178994834  | 1.92E-19       | 1.88E-18         | 32.59986139 |
| MAGED2        | 1.064502339  | 7.645671995    | 9.158480832  | 2.29E-19       | 2.23E-18         | 32.42441564 |
| SEMA3C        | -1.217339479 | 4.432735619    | -9.157710689 | 2.30E-19       | 2.25E-18         | 32.41783561 |
| CXCL9         | 1.909460354  | 3.816441149    | 9.11279278   | 3.40E-19       | 3.29E-18         | 32.03489147 |
| PLA2G2A       | -1.663086893 | 1.831439479    | -9.106470676 | 3.59E-19       | 3.47E-18         | 31.98112392 |
| CTA-384D8.35  | 1.067524608  | 1.486585862    | 9.043522145  | 6.15E-19       | 5.87E-18         | 31.44753334 |
| PI3           | -1.687429839 | 1.329304262    | -9.036169028 | 6.55E-19       | 6.24E-18         | 31.38541353 |
| ARNT2         | 1.180225789  | 2.709273298    | 9.00196229   | 8.77E-19       | 8.30E-18         | 31.09700966 |
| MIR205HG      | -1.443594635 | 2.355432945    | -8.991634022 | 9.58E-19       | 9.04E-18         | 31.01011704 |
| KCNK15        | 1.29583522   | 2.229270012    | 8.991318309  | 9.60E-19       | 9.06E-18         | 31.00746229 |
| EDN2          | 1.123817699  | 1.815036006    | 8.989818313  | 9.73E-19       | 9.17E-18         | 30.9948503  |
| VSIG2         | -1.251780546 | 1.464409219    | -8.975475188 | 1.10E-18       | 1.03E-17         | 30.87434561 |

| <b>Symbol</b> | <b>logFC</b> | <b>AveExpr</b> | <b>t</b>     | <b>P.Value</b> | <b>adj.P.Val</b> | <b>B</b>    |
|---------------|--------------|----------------|--------------|----------------|------------------|-------------|
| CBX2          | 1.126570418  | 1.836340908    | 8.946896657  | 1.40E-18       | 1.31E-17         | 30.63474102 |
| TRPS1         | 1.098072212  | 5.15883172     | 8.943107122  | 1.45E-18       | 1.35E-17         | 30.60301928 |
| NOVA1         | -1.113212544 | 1.234946374    | -8.940717812 | 1.48E-18       | 1.38E-17         | 30.58302468 |
| GPR160        | 1.000996234  | 3.289236629    | 8.94003977   | 1.48E-18       | 1.38E-17         | 30.57735143 |
| FGD3          | 1.223642435  | 2.856604842    | 8.931813371  | 1.59E-18       | 1.48E-17         | 30.50855017 |
| CPNE7         | 1.021400943  | 1.549927149    | 8.930818105  | 1.60E-18       | 1.49E-17         | 30.50023004 |
| RP11-817J15.2 | -1.005786361 | 0.780703453    | -8.906048796 | 1.98E-18       | 1.83E-17         | 30.2934264  |
| BATF          | 1.040566799  | 3.482224411    | 8.894847751  | 2.17E-18       | 2.01E-17         | 30.20007137 |
| RGS5          | -1.027347112 | 3.282052442    | -8.883984815 | 2.38E-18       | 2.20E-17         | 30.1096323  |
| MAPK15        | 1.202668977  | 1.97216728     | 8.883828572  | 2.39E-18       | 2.20E-17         | 30.10833221 |
| MARCO         | -1.242494192 | 1.238332264    | -8.883688814 | 2.39E-18       | 2.21E-17         | 30.1071693  |
| CNTNAP2       | 1.232462966  | 1.390716837    | 8.868327259  | 2.72E-18       | 2.50E-17         | 29.97944562 |
| PPP2R2C       | 1.076614974  | 1.265648001    | 8.853860709  | 3.07E-18       | 2.82E-17         | 29.85934009 |
| HOXC10        | 1.590507716  | 3.33158932     | 8.852685848  | 3.10E-18       | 2.84E-17         | 29.84959357 |
| CAPN13        | 1.167104325  | 2.527017727    | 8.840595818  | 3.43E-18       | 3.14E-17         | 29.74936175 |
| SLC44A4       | 1.859961502  | 4.332928852    | 8.828224226  | 3.81E-18       | 3.48E-17         | 29.64691969 |
| TAP1          | 1.022301045  | 4.51140203     | 8.804896026  | 4.63E-18       | 4.21E-17         | 29.45409379 |
| SESN3         | -1.052376708 | 2.734925717    | -8.799953591 | 4.82E-18       | 4.38E-17         | 29.41329802 |
| PODN          | -1.118262856 | 3.342060309    | -8.798824288 | 4.87E-18       | 4.42E-17         | 29.40397936 |
| ADAMDEC1      | 1.157444763  | 1.564483475    | 8.797125039  | 4.94E-18       | 4.48E-17         | 29.38995966 |
| FBLN2         | -1.166806647 | 4.723914082    | -8.789436398 | 5.27E-18       | 4.77E-17         | 29.32655393 |
| ESPN          | 1.085471252  | 2.349412161    | 8.770742627  | 6.16E-18       | 5.56E-17         | 29.17259512 |
| SERPINB5      | -1.50080307  | 1.925998062    | -8.764040219 | 6.51E-18       | 5.87E-17         | 29.11746515 |
| RND1          | 1.017893709  | 2.412641619    | 8.763206603  | 6.55E-18       | 5.91E-17         | 29.11061092 |

| <b>Symbol</b> | <b>logFC</b>  | <b>AveExpr</b> | <b>t</b>     | <b>P.Value</b> | <b>adj.P.Val</b> | <b>B</b>    |
|---------------|---------------|----------------|--------------|----------------|------------------|-------------|
| TTYH1         | -1.062438358  | 0.79655127     | -8.756947001 | 6.91E-18       | 6.21E-17         | 29.05916087 |
| EEF1A2        | 2.147282221   | 4.006458383    | 8.71982827   | 9.40E-18       | 8.38E-17         | 28.75473056 |
| TFPI2         | -1.457755948  | 1.616949394    | -8.716265222 | 9.68E-18       | 8.63E-17         | 28.72556782 |
| SLC34A2       | -1.671280138  | 1.949222702    | -8.714040196 | 9.86E-18       | 8.78E-17         | 28.70736179 |
| OAS2          | 1.166583226   | 3.766696911    | 8.693994152  | 1.16E-17       | 1.03E-16         | 28.54352132 |
| COL3A1        | 1.359198918   | 8.733216808    | 8.680214815  | 1.30E-17       | 1.16E-16         | 28.43109219 |
| IGHA2         | -2.326258179  | 5.522484863    | -8.675724424 | 1.35E-17       | 1.20E-16         | 28.3944878  |
| AL928761.1    | 1.65239385    | 1.864019767    | 8.673690468  | 1.38E-17       | 1.22E-16         | 28.37791304 |
| APOC1         | 1.084886277   | 5.013068957    | 8.650937624  | 1.66E-17       | 1.46E-16         | 28.19273254 |
| PHLDA2        | 1.021932337   | 2.891978351    | 8.633329102  | 1.92E-17       | 1.69E-16         | 28.04971426 |
| CACNG4        | 1.668511328   | 3.819768411    | 8.623270992  | 2.09E-17       | 1.83E-16         | 27.96813632 |
| RAI2          | -1.189616542  | 3.018642636    | -8.600639549 | 2.51E-17       | 2.19E-16         | 27.78488647 |
| DLK1          | -1.005479457  | 0.370046803    | -8.58640049  | 2.82E-17       | 2.46E-16         | 27.66980831 |
| CDKN2A        | 1.076251279   | 1.751164933    | 8.567643216  | 3.29E-17       | 2.85E-16         | 27.51847107 |
| CLPSL1        | 1.066240618   | 1.431129195    | 8.541084544  | 4.09E-17       | 3.52E-16         | 27.30468994 |
| SLC5A1        | -1.151073395  | 1.356720027    | -8.518008674 | 4.93E-17       | 4.23E-16         | 27.11941884 |
| FBLN1         | -1.012078392  | 4.803708673    | -8.506560486 | 5.41E-17       | 4.62E-16         | 27.02766812 |
| CRISPLD1      | -1.3711117035 | 2.323811       | -8.495038748 | 5.94E-17       | 5.07E-16         | 26.93543799 |
| GPX2          | -1.005829942  | 1.043790691    | -8.492751811 | 6.05E-17       | 5.16E-16         | 26.91714447 |
| GALNT6        | 1.313509306   | 4.292810853    | 8.476947366  | 6.88E-17       | 5.84E-16         | 26.79084159 |
| TINCR         | 1.134559482   | 1.801208871    | 8.443301089  | 9.03E-17       | 7.63E-16         | 26.52264683 |
| CLGN          | 1.254209854   | 2.096092646    | 8.443230742  | 9.03E-17       | 7.63E-16         | 26.52208708 |
| FGF10         | -1.334993122  | 1.319492535    | -8.406208735 | 1.22E-16       | 1.02E-15         | 26.22807758 |
| SYT13         | 1.716261463   | 2.022729548    | 8.380058442  | 1.50E-16       | 1.25E-15         | 26.02109543 |



| <b>Symbol</b> | <b>logFC</b> | <b>AveExpr</b> | <b>t</b>     | <b>P.Value</b> | <b>adj.P.Val</b> | <b>B</b>    |
|---------------|--------------|----------------|--------------|----------------|------------------|-------------|
| RP11-452I5.2  | 1.05798928   | 2.486273525    | 8.359416543  | 1.77E-16       | 1.47E-15         | 25.8581166  |
| RP11-459E5.1  | 1.060190762  | 1.328850867    | 8.327848452  | 2.28E-16       | 1.88E-15         | 25.60955947 |
| PRLR          | 1.080159835  | 3.886316932    | 8.326710678  | 2.30E-16       | 1.90E-15         | 25.60061659 |
| HOTAIR        | 1.016017217  | 1.406257559    | 8.324937783  | 2.33E-16       | 1.92E-15         | 25.58668383 |
| F2RL2         | 1.174964635  | 2.733244443    | 8.255383831  | 4.05E-16       | 3.30E-15         | 25.04215696 |
| RET           | 1.414119714  | 2.4351675      | 8.24191721   | 4.51E-16       | 3.66E-15         | 24.93719847 |
| FGFR3         | 1.174250457  | 2.155422191    | 8.220501599  | 5.34E-16       | 4.32E-15         | 24.77059997 |
| RP11-428L9.2  | 1.755205983  | 1.781986882    | 8.210007641  | 5.79E-16       | 4.68E-15         | 24.68910524 |
| NEURL1        | 1.037821346  | 1.305131652    | 8.194008194  | 6.57E-16       | 5.29E-15         | 24.5650341  |
| SLC16A6       | 1.287890417  | 2.48552806     | 8.168457389  | 8.03E-16       | 6.43E-15         | 24.36734234 |
| GDF15         | 1.294948225  | 2.566595707    | 8.168136467  | 8.05E-16       | 6.44E-15         | 24.36486281 |
| ETNK2         | 1.022786825  | 3.20582556     | 8.167308271  | 8.10E-16       | 6.48E-15         | 24.35846431 |
| NTN4          | -1.405609295 | 4.322078326    | -8.138713132 | 1.01E-15       | 8.06E-15         | 24.13789884 |
| MGST1         | -1.058390426 | 4.242165853    | -8.121301622 | 1.16E-15       | 9.21E-15         | 24.00393533 |
| NAT1          | 1.920840538  | 3.863323926    | 8.118782042  | 1.18E-15       | 9.38E-15         | 23.984571   |
| CEACAM6       | 2.183763301  | 3.424315636    | 8.091447421  | 1.47E-15       | 1.16E-14         | 23.77483474 |
| ANXA9         | 1.152960046  | 3.997404069    | 8.081772704  | 1.58E-15       | 1.24E-14         | 23.70075293 |
| CXCL14        | -1.89850223  | 5.659753347    | -8.071967399 | 1.70E-15       | 1.34E-14         | 23.62575205 |
| NPNT          | 1.321366001  | 4.242460564    | 8.060759056  | 1.86E-15       | 1.46E-14         | 23.54011906 |
| PKIB          | 1.211948946  | 3.277244244    | 8.051268747  | 2.00E-15       | 1.56E-14         | 23.46769526 |
| ZNF552        | 1.089713124  | 3.979366673    | 8.036824501  | 2.24E-15       | 1.74E-14         | 23.35761283 |
| GATA3         | 1.611198992  | 6.68116451     | 8.035795437  | 2.26E-15       | 1.76E-14         | 23.34977689 |
| EVL           | 1.019258357  | 4.233356567    | 7.998474337  | 3.01E-15       | 2.33E-14         | 23.06619771 |
| SIX2          | 1.00908104   | 1.69724941     | 7.944209637  | 4.56E-15       | 3.50E-14         | 22.65598655 |

| <b>Symbol</b> | <b>logFC</b> | <b>AveExpr</b> | <b>t</b>     | <b>P.Value</b> | <b>adj.P.Val</b> | <b>B</b>    |
|---------------|--------------|----------------|--------------|----------------|------------------|-------------|
| HIST3H2A      | 1.297546919  | 3.612699847    | 7.935458669  | 4.88E-15       | 3.73E-14         | 22.59006868 |
| VAV3          | 1.138074763  | 4.214627946    | 7.921268674  | 5.44E-15       | 4.15E-14         | 22.48331923 |
| F13A1         | -1.096899796 | 3.214659956    | -7.879254749 | 7.49E-15       | 5.66E-14         | 22.16826062 |
| KLF5          | -1.038903726 | 2.597012761    | -7.855447358 | 8.97E-15       | 6.75E-14         | 21.99039983 |
| CLU           | -1.174736374 | 6.336963797    | -7.841315733 | 9.99E-15       | 7.49E-14         | 21.88505399 |
| SLPI          | -1.912080074 | 4.909122361    | -7.827910942 | 1.11E-14       | 8.26E-14         | 21.78528421 |
| ASPN          | 1.412468734  | 4.608374691    | 7.76909332   | 1.72E-14       | 1.27E-13         | 21.34933167 |
| DSG3          | -1.21918442  | 1.316489209    | -7.759431283 | 1.85E-14       | 1.37E-13         | 21.27800071 |
| KCNK1         | 1.112122926  | 2.619787083    | 7.732204181  | 2.27E-14       | 1.67E-13         | 21.07742474 |
| AL122127.2    | 1.270818439  | 1.725024049    | 7.714698264  | 2.59E-14       | 1.89E-13         | 20.9487987  |
| FOXA1         | 1.690756779  | 5.422918895    | 7.710352873  | 2.67E-14       | 1.96E-13         | 20.9169114  |
| TPSP2         | 1.122880212  | 1.400322829    | 7.683764302  | 3.26E-14       | 2.37E-13         | 20.72215295 |
| CD24          | 1.42405925   | 7.579697177    | 7.660748398  | 3.86E-14       | 2.80E-13         | 20.55405494 |
| FSIP1         | 1.197828317  | 1.989962934    | 7.641610332  | 4.45E-14       | 3.22E-13         | 20.41462623 |
| PPP1R1B       | -1.695131539 | 3.123020437    | -7.585321492 | 6.74E-14       | 4.82E-13         | 20.00636884 |
| COL12A1       | 1.064289861  | 5.017956744    | 7.583388902  | 6.84E-14       | 4.89E-13         | 19.99240051 |
| GATA3-AS1     | 1.073882698  | 1.805270228    | 7.573555045  | 7.35E-14       | 5.24E-13         | 19.92137351 |
| MIA           | -1.087073884 | 1.10886851     | -7.565834748 | 7.78E-14       | 5.54E-13         | 19.86567066 |
| CST6          | 1.041102573  | 1.829312646    | 7.493848122  | 1.32E-13       | 9.24E-13         | 19.34875996 |
| PTHLH         | -1.059922355 | 1.568050536    | -7.450943998 | 1.80E-13       | 1.25E-12         | 19.04281542 |
| CEACAM5       | 1.564655406  | 1.820690344    | 7.44703251   | 1.85E-13       | 1.29E-12         | 19.01500246 |
| HMGCS2        | -1.835411691 | 2.290589485    | -7.433133494 | 2.04E-13       | 1.42E-12         | 18.91627983 |
| KLK6          | -1.369489577 | 1.447873336    | -7.403912378 | 2.52E-13       | 1.74E-12         | 18.7092739  |
| MIR8071-1     | 1.187198527  | 1.53354752     | 7.390687951  | 2.77E-13       | 1.91E-12         | 18.61583443 |

| <b>Symbol</b> | <b>logFC</b> | <b>AveExpr</b> | <b>t</b>     | <b>P.Value</b> | <b>adj.P.Val</b> | <b>B</b>    |
|---------------|--------------|----------------|--------------|----------------|------------------|-------------|
| MIR8071-2     | 1.264896817  | 1.966357561    | 7.296785076  | 5.43E-13       | 3.68E-12         | 17.95672739 |
| SPDEF         | 1.523556305  | 5.855156841    | 7.286211406  | 5.85E-13       | 3.96E-12         | 17.88299217 |
| BCAS1         | 1.048073587  | 1.892663125    | 7.267870724  | 6.66E-13       | 4.50E-12         | 17.75532548 |
| TSPAN1        | 1.498860656  | 4.182425299    | 7.213074427  | 9.81E-13       | 6.55E-12         | 17.37564871 |
| ERBB2         | 1.080111483  | 5.275384144    | 7.189472444  | 1.16E-12       | 7.69E-12         | 17.21292332 |
| BMPR1B        | 1.848483055  | 2.72616579     | 7.135131799  | 1.69E-12       | 1.11E-11         | 16.84012492 |
| NUPR1L        | 1.025228449  | 2.221394927    | 7.124991143  | 1.82E-12       | 1.19E-11         | 16.77084294 |
| RIMS4         | 1.194194427  | 1.623893239    | 7.098631061  | 2.18E-12       | 1.43E-11         | 16.59117091 |
| AKR7A3        | 1.335735128  | 2.859779977    | 7.093847849  | 2.25E-12       | 1.47E-11         | 16.5586337  |
| CYP2B7P       | 1.886195174  | 2.811059006    | 7.08211633   | 2.45E-12       | 1.59E-11         | 16.47891669 |
| PROM1         | -1.396628566 | 2.221161713    | -7.072905703 | 2.61E-12       | 1.69E-11         | 16.41641429 |
| DSCAM-AS1     | 1.404673132  | 1.380440425    | 7.001490909  | 4.26E-12       | 2.74E-11         | 15.93433619 |
| RN7SL2        | 1.132467807  | 5.456868205    | 6.990249979  | 4.60E-12       | 2.95E-11         | 15.85886508 |
| FOXC1         | -1.045655303 | 2.060018257    | -6.968560062 | 5.34E-12       | 3.41E-11         | 15.71355523 |
| ASS1          | -1.110794473 | 4.558663976    | -6.931142214 | 6.88E-12       | 4.37E-11         | 15.46385444 |
| RP11-616M22.7 | 1.032962901  | 1.911361963    | 6.930415262  | 6.92E-12       | 4.39E-11         | 15.45901552 |
| IGHV3-72      | -1.211489667 | 2.222522077    | -6.915324639 | 7.66E-12       | 4.85E-11         | 15.35867123 |
| MGP           | -1.427030243 | 8.707464332    | -6.908763143 | 8.01E-12       | 5.06E-11         | 15.31510377 |
| C19orf33      | 1.427725592  | 3.565255706    | 6.863994451  | 1.08E-11       | 6.80E-11         | 15.01886324 |
| SUSD3         | 1.410083059  | 4.430586666    | 6.8444449568 | 1.24E-11       | 7.73E-11         | 14.89008917 |
| FABP7         | -1.211405077 | 0.986244598    | -6.839678305 | 1.28E-11       | 7.98E-11         | 14.85870454 |
| MT1E          | -1.034162888 | 4.284980774    | -6.806209907 | 1.60E-11       | 9.90E-11         | 14.63912254 |
| ZNF703        | 1.078065416  | 5.153176187    | 6.755867343  | 2.23E-11       | 1.37E-10         | 14.31070582 |
| NELL2         | 1.082684002  | 1.857871472    | 6.597807042  | 6.31E-11       | 3.76E-10         | 13.29425309 |

| <b>Symbol</b> | <b>logFC</b> | <b>AveExpr</b> | <b>t</b>     | <b>P.Value</b> | <b>adj.P.Val</b> | <b>B</b>    |
|---------------|--------------|----------------|--------------|----------------|------------------|-------------|
| C2orf54       | 1.069026894  | 1.529804287    | 6.575622127  | 7.29E-11       | 4.33E-10         | 13.15337273 |
| SEZ6L2        | 1.018873828  | 3.69034206     | 6.554957118  | 8.33E-11       | 4.93E-10         | 13.02254061 |
| CST4          | 1.053664102  | 0.994015359    | 6.533806066  | 9.55E-11       | 5.62E-10         | 12.88902755 |
| ARHGAP40      | -1.049492292 | 1.419952195    | -6.515739769 | 1.07E-10       | 6.30E-10         | 12.77530421 |
| MX1           | 1.002868584  | 3.798958918    | 6.507851392  | 1.13E-10       | 6.62E-10         | 12.72574046 |
| DNAJC12       | 1.206535837  | 3.416919411    | 6.366663793  | 2.77E-10       | 1.58E-09         | 11.84809757 |
| AGR2          | 1.807526453  | 6.095132902    | 6.352872352  | 3.02E-10       | 1.72E-09         | 11.76333012 |
| AP000439.3    | 1.00597823   | 1.548115658    | 6.330553419  | 3.47E-10       | 1.96E-09         | 11.62651296 |
| PYDC1         | 1.159054633  | 1.374658051    | 6.32211157   | 3.66E-10       | 2.07E-09         | 11.57488081 |
| PRAME         | 1.258502138  | 1.348745486    | 6.288910576  | 4.51E-10       | 2.52E-09         | 11.37244075 |
| DIO1          | 1.041562038  | 1.422526553    | 6.227246578  | 6.61E-10       | 3.66E-09         | 10.99909449 |
| HSPB8         | -1.106568572 | 3.367456796    | -6.224242341 | 6.73E-10       | 3.72E-09         | 10.98099318 |
| BPIFB1        | 1.167078378  | 1.875441085    | 6.214424804  | 7.15E-10       | 3.95E-09         | 10.92189695 |
| KCNE4         | 1.150759502  | 3.006245038    | 6.18536177   | 8.55E-10       | 4.69E-09         | 10.74746529 |
| IGHG1         | 1.84314658   | 6.437448762    | 6.184268672  | 8.61E-10       | 4.72E-09         | 10.74091964 |
| MLPH          | 1.148228275  | 4.779317815    | 6.107405262  | 1.38E-09       | 7.43E-09         | 10.28336748 |
| LTF           | -1.897747649 | 5.123222691    | -6.098174948 | 1.46E-09       | 7.84E-09         | 10.22878223 |
| CCNO          | 1.004057566  | 2.097532326    | 6.079042066  | 1.63E-09       | 8.76E-09         | 10.11588299 |
| IGHGP         | 1.212193213  | 3.277621735    | 6.056427406  | 1.87E-09       | 1.00E-08         | 9.982867986 |
| KRT6B         | -1.334624069 | 2.441638207    | -6.044956539 | 2.01E-09       | 1.07E-08         | 9.915576556 |
| IGHA1         | -1.631495142 | 7.832340112    | -6.040935421 | 2.06E-09       | 1.09E-08         | 9.892015883 |
| AGTR1         | -1.114763021 | 1.719677605    | -6.02401138  | 2.28E-09       | 1.21E-08         | 9.793015403 |
| IGHG3         | 1.488819607  | 4.734611319    | 5.9254959    | 4.09E-09       | 2.13E-08         | 9.22191647  |
| IFI27         | 1.003598621  | 4.996332935    | 5.746934711  | 1.16E-08       | 5.83E-08         | 8.209419134 |

| <b>Symbol</b> | <b>logFC</b> | <b>AveExpr</b> | <b>t</b>     | <b>P.Value</b> | <b>adj.P.Val</b> | <b>B</b>     |
|---------------|--------------|----------------|--------------|----------------|------------------|--------------|
| RARRES1       | -1.040311651 | 3.283688065    | -5.656578654 | 1.94E-08       | 9.60E-08         | 7.708227059  |
| FDCSP         | -1.619566219 | 2.600050093    | -5.63818957  | 2.15E-08       | 1.06E-07         | 7.607146049  |
| KCNJ3         | 1.216826111  | 1.492283107    | 5.62728219   | 2.29E-08       | 1.13E-07         | 7.547337703  |
| PIP           | -2.102197614 | 5.456754505    | -5.601077827 | 2.65E-08       | 1.30E-07         | 7.404099995  |
| LRG1          | 1.062286044  | 3.001510204    | 5.502135519  | 4.61E-08       | 2.21E-07         | 6.868981071  |
| AC244250.2    | -1.065518066 | 2.166750958    | -5.442572236 | 6.39E-08       | 3.03E-07         | 6.551206279  |
| AGR3          | 1.572791129  | 5.04062517     | 5.407341269  | 7.75E-08       | 3.65E-07         | 6.364793829  |
| AQP5          | -1.027008984 | 1.428867624    | -5.345380031 | 1.08E-07       | 5.04E-07         | 6.039741959  |
| CXCL13        | 1.244766382  | 2.697063058    | 5.341652174  | 1.11E-07       | 5.14E-07         | 6.020299168  |
| IGKV2-24      | -1.057282003 | 2.671951534    | -5.337881599 | 1.13E-07       | 5.24E-07         | 6.000646718  |
| PVALB         | 1.109164857  | 1.415000726    | 5.319082888  | 1.25E-07       | 5.77E-07         | 5.902864016  |
| CA12          | 1.10860942   | 5.018182078    | 5.250009703  | 1.81E-07       | 8.21E-07         | 5.546399356  |
| TCN1          | -1.102809256 | 1.753445243    | -5.228756994 | 2.02E-07       | 9.15E-07         | 5.437614934  |
| IGHV3-74      | -1.049271124 | 3.392548249    | -4.962860638 | 7.98E-07       | 3.43E-06         | 4.112264338  |
| TFF1          | 1.795267284  | 5.447915274    | 4.882978109  | 1.19E-06       | 5.02E-06         | 3.7270382    |
| IGKV1-9       | -1.055171887 | 3.602220778    | -4.708320109 | 2.80E-06       | 1.14E-05         | 2.905693248  |
| RP11-53O19.1  | 1.013196571  | 2.121150258    | 4.706019579  | 2.83E-06       | 1.15E-05         | 2.895066833  |
| MSMB          | 1.030383957  | 2.257232603    | 4.611667031  | 4.43E-06       | 1.77E-05         | 2.463552628  |
| PSPHP1        | 1.165473518  | 2.168477947    | 4.549118464  | 5.95E-06       | 2.34E-05         | 2.182136839  |
| S100A7        | 1.340997748  | 1.937825315    | 4.450161552  | 9.40E-06       | 3.63E-05         | 1.744494256  |
| CLEC3A        | 1.367525711  | 1.905351124    | 4.419367548  | 1.08E-05       | 4.15E-05         | 1.610203844  |
| TFF3          | 1.23650443   | 5.691061848    | 4.097094266  | 4.47E-05       | 0.000159835      | 0.259021759  |
| SCGB1D2       | -1.555707447 | 4.862077265    | -4.026382642 | 6.03E-05       | 0.000212226      | -0.024163579 |
| SCGB2A2       | -1.184982449 | 5.438807489    | -2.832017777 | 0.004704847    | 0.012449103      | -4.077465538 |

Supplementary Table 8 List of the common genes between TCGA-DEGs and lipid metabolism-related genes

| Gene Name |         |       |         |         |          |          |         |
|-----------|---------|-------|---------|---------|----------|----------|---------|
| B4GALT3   | LIPE    | THRSP | ALDH1A1 | CYP26B1 | GOLM1    | MIF      | RBP4    |
| AADAC     | LPCAT2  | BAX   | ALDH1A2 | CYP2U1  | GPC3     | MIR27A   | RDH5    |
| ACSL1     | LPL     | KIT   | ALDH1A3 | CYP39A1 | GPIHBP1  | MIR27B   | RETSAT  |
| ACSL4     | MBOAT2  | ABCD2 | ANGPTL4 | DAB2IP  | GSTA1    | MLXIPL   | RGL1    |
| AGPAT2    | MBOAT7  | ACAA2 | ANXA1   | DEGS2   | GSTM2    | P2RY12   | SCT     |
| APOC1     | MGLL    | ACACB | APOD    | DHRS3   | HADH     | PAFAH1B3 | SDC1    |
| BMX       | PCK1    | ACADL | BMP2    | DKK3    | HCAR2    | PC       | SLC27A6 |
| C3        | PGP     | ACADS | BMP6    | ECHDC1  | HMGCS2   | PDE3B    | SORBS1  |
| CAT       | PIK3C2G | ACSL5 | CCDC3   | ECHDC3  | HSD11B1  | PDGFRA   | SPP1    |
| CAV1      | PIK3R1  | ACSM5 | CCL21   | EDN1    | HSD17B11 | PDK4     | SQLE    |
| CPNE7     | PLA2G2A | ACSS2 | CD36    | EDN2    | HSD17B13 | PLIN1    | STAT5B  |
| DGAT2     | PLA2G4A | ADH1B | CEBPA   | EEF1A2  | HSD17B6  | PLTP     | TEK     |
| ENPP2     | PLEKHA4 | ADH1C | CERS2   | EGFR    | IRS2     | PPARG    | TIPARP  |

---

Gene Name

---

|         |         |        |        |        |         |         |         |
|---------|---------|--------|--------|--------|---------|---------|---------|
| ETNK2   | PNPLA2  | ADIPOQ | CES1   | EGR1   | KLF4    | PRKAR2B | TRIB3   |
| FABP4   | RGN     | ADM    | CIDEA  | FADS3  | LEP     | PRLR    | TWIST1  |
| FABP7   | SERINC2 | ADRA2A | CLPSL1 | FAXDC2 | LEPR    | PTGDS   | VAV3    |
| FAM126A | SLC44A4 | AGTR1  | CLPSL2 | FGF1   | LGALS12 | PTGIS   | VLDLR   |
| FGF2    | SOCS2   | AKR1C1 | CLU    | FGFR1  | LRP1    | PTGS2   | ABHD17C |
| GPAM    | SOCS3   | AKR1C2 | CRABP2 | FGFR3  | LSR     | QKI     | APOLD1  |
| GPD1    | STARD10 | AKR1C3 | CYGB   | G0S2   | ME1     | RARRES2 | CTSD    |
| NMT2    | OLR1    |        |        |        |         |         |         |

---

Supplementary Table 9 Sequences of the plasmids used in this study.

| Gene              |            | Primer                                   |
|-------------------|------------|------------------------------------------|
| si- <i>SDCI</i>   |            | 5'-AUUAGUAGCCACAAUUUGCGG-3'              |
| si- <i>SORBS1</i> |            | 5'-AAGAAACUUCAUUUAGUAGAG-3'              |
| <i>SDCI</i>       | upstream   | 5'-AAGGGATCCCTGAAGTCTAGGTTGCATCCTGA-3'   |
|                   | downstream | 5'-CGAGAATTCCTGCGTAACGTCATTACGTCTGCA-3'  |
| <i>SORBS1</i>     | upstream   | 5'-TTATCTAGAGTCGTCAACGTCTTACGCAATGC-3'   |
|                   | downstream | 5'-TGCGAGCTCTTGAAGTCAACTGACGTCAGTCTGC-3' |



Supplementary Table 10 Distribution of BRCA sample characteristics in TCGA-training set and testing set

|                              | <b>Train<br/>(N=617)</b> | <b>Validate<br/>(N=264)</b> | <b>P-value</b> |
|------------------------------|--------------------------|-----------------------------|----------------|
| <b>fustate</b>               |                          |                             |                |
| Alive                        | 534 (86.5%)              | 221 (83.7%)                 | 0.319          |
| Dead                         | 83 (13.5%)               | 43 (16.3%)                  |                |
| <b>Age</b>                   |                          |                             |                |
| <60                          | 332 (53.8%)              | 160 (60.6%)                 | 0.0739         |
| >60                          | 285 (46.2%)              | 104 (39.4%)                 |                |
| <b>Gender</b>                |                          |                             |                |
| female                       | 609 (98.7%)              | 261 (98.9%)                 | 1              |
| male                         | 8 (1.3%)                 | 3 (1.1%)                    |                |
| <b>ajcc_pathologic_m</b>     |                          |                             |                |
| M0                           | 606 (98.2%)              | 258 (97.7%)                 | 0.828          |
| M1                           | 11 (1.8%)                | 6 (2.3%)                    |                |
| <b>ajcc_pathologic_n</b>     |                          |                             |                |
| N0                           | 299 (48.5%)              | 133 (50.4%)                 | 0.671          |
| N1                           | 211 (34.2%)              | 83 (31.4%)                  |                |
| N2                           | 73 (11.8%)               | 29 (11.0%)                  |                |
| N3                           | 34 (5.5%)                | 19 (7.2%)                   |                |
| <b>ajcc_pathologic_stage</b> |                          |                             |                |
| Stage_I                      | 108 (17.5%)              | 47 (17.8%)                  | 0.962          |
| Stage_II                     | 360 (58.3%)              | 154 (58.3%)                 |                |
| Stage_III                    | 138 (22.4%)              | 57 (21.6%)                  |                |
| Stage_IV                     | 11 (1.8%)                | 6 (2.3%)                    |                |
| <b>ajcc_pathologic_t</b>     |                          |                             |                |

---

|    |             |             |       |
|----|-------------|-------------|-------|
| T1 | 162 (26.3%) | 69 (26.1%)  | 0.107 |
| T2 | 357 (57.9%) | 165 (62.5%) |       |
| T3 | 78 (12.6%)  | 19 (7.2%)   |       |
| T4 | 20 (3.2%)   | 11 (4.2%)   |       |

---

Supplementary Table 11 Results of classical pathway analysis based on 162 lipid metabolism-related DEGs

| Ingenuity Canonical Pathways                                                  | P-value     | z-score |
|-------------------------------------------------------------------------------|-------------|---------|
| CREB Signaling in Neurons                                                     | 0.000169824 | -3.051  |
| Cardiac Hypertrophy Signaling (Enhanced)                                      | 3.01995E-05 | -2.887  |
| Xenobiotic Metabolism PXR Signaling Pathway                                   | 3.98107E-05 | -2.828  |
| Retinol Biosynthesis                                                          | 5.12861E-08 | -2.646  |
| Estrogen Receptor Signaling                                                   | 0.006309573 | -2.449  |
| HIF1 $\alpha$ Signaling                                                       | 0.002630268 | -2.449  |
| IL-8 Signaling                                                                | 0.002238721 | -2.449  |
| Endothelin-1 Signaling                                                        | 0.002187762 | -2.449  |
| Colorectal Cancer Metastasis Signaling                                        | 0.001548817 | -2.449  |
| Triacylglycerol Degradation                                                   | 1.69824E-06 | -2.449  |
| Breast Cancer Regulation by Stathmin1                                         | 0.015848932 | -2.333  |
| Retinoate Biosynthesis I                                                      | 3.98107E-14 | -2.333  |
| Sirtuin Signaling Pathway                                                     | 0.005370318 | -2.236  |
| ERK/MAPK Signaling                                                            | 0.002344229 | -2.236  |
| Ovarian Cancer Signaling                                                      | 0.000331131 | -2.236  |
| Xenobiotic Metabolism AHR Signaling Pathway                                   | 0.000251189 | -2.236  |
| Serotonin Degradation                                                         | 1.8197E-05  | -2.236  |
| Noradrenaline and Adrenaline Degradation                                      | 1.09648E-06 | -2.236  |
| Tumor Microenvironment Pathway                                                | 2.95121E-05 | -2.121  |
| Regulation Of The Epithelial Mesenchymal Transition By Growth Factors Pathway | 4.57088E-07 | -2.121  |
| Ethanol Degradation II                                                        | 2.63027E-10 | -2.121  |
| Ethanol Degradation IV                                                        | 3.98107E-11 | -2.121  |
| HER-2 Signaling in Breast Cancer                                              | 0.038904514 | -2      |

| Ingenuity Canonical Pathways                      | P-value     | z-score |
|---------------------------------------------------|-------------|---------|
| IL-17 Signaling                                   | 0.035481339 | -2      |
| Dendritic Cell Maturation                         | 0.033113112 | -2      |
| Glioblastoma Multiforme Signaling                 | 0.025118864 | -2      |
| Huntington's Disease Signaling                    | 0.022387211 | -2      |
| Xenobiotic Metabolism General Signaling Pathway   | 0.015848932 | -2      |
| Th2 Pathway                                       | 0.012022644 | -2      |
| p70S6K Signaling                                  | 0.011748976 | -2      |
| CCR3 Signaling in Eosinophils                     | 0.01        | -2      |
| Renin-Angiotensin Signaling                       | 0.009549926 | -2      |
| ILK Signaling                                     | 0.00851138  | -2      |
| Glioma Signaling                                  | 0.007413102 | -2      |
| Pancreatic Adenocarcinoma Signaling               | 0.006025596 | -2      |
| Melanocyte Development and Pigmentation Signaling | 0.003630781 | -2      |
| VEGF Family Ligand-Receptor Interactions          | 0.002818383 | -2      |
| PEDF Signaling                                    | 0.002041738 | -2      |
| IL-7 Signaling Pathway                            | 0.001862087 | -2      |
| Reelin Signaling in Neurons                       | 0.00128825  | -2      |
| Thrombopoietin Signaling                          | 0.000954993 | -2      |
| Estrogen Biosynthesis                             | 2.45471E-05 | -2      |
| $\alpha$ -linolenate Biosynthesis II (Animals)    | 1.65959E-05 | -2      |
| Mitochondrial L-carnitine Shuttle Pathway         | 9.54993E-06 | -2      |
| Fatty Acid Activation                             | 6.16595E-06 | -2      |
| Estrogen-Dependent Breast Cancer Signaling        | 8.51138E-07 | -2      |

| Ingenuity Canonical Pathways                        | P-value     | z-score |
|-----------------------------------------------------|-------------|---------|
| Hepatic Fibrosis Signaling Pathway                  | 1.65959E-06 | -1.941  |
| AMPK Signaling                                      | 2.69153E-06 | -1.897  |
| NF-B Signaling                                      | 0.000177828 | -1.89   |
| IL-15 Production                                    | 1.47911E-05 | -1.89   |
| Fatty Acid $\beta$ -oxidation I                     | 5.7544E-10  | -1.89   |
| Insulin Secretion Signaling Pathway                 | 0.008128305 | -1.633  |
| cAMP-mediated signaling                             | 0.004265795 | -1.633  |
| Adrenomedullin signaling pathway                    | 0.002290868 | -1.633  |
| Xenobiotic Metabolism CAR Signaling Pathway         | 0.001513561 | -1.633  |
| FGF Signaling                                       | 2.39883E-05 | -1.633  |
| Leptin Signaling in Obesity                         | 7.76247E-07 | -1.633  |
| Oxidative Ethanol Degradation III                   | 4.46684E-08 | -1.633  |
| Erythropoietin Signaling Pathway                    | 0.006456542 | -1.342  |
| Tec Kinase Signaling                                | 0.006025596 | -1.342  |
| Fc Epsilon RI Signaling                             | 0.00128825  | -1.342  |
| Nitric Oxide Signaling in the Cardiovascular System | 0.000831764 | -1.342  |
| Acute Myeloid Leukemia Signaling                    | 0.000338844 | -1.342  |
| Gai Signaling                                       | 0.000194984 | -1.342  |
| Stearate Biosynthesis I (Animals)                   | 5.62341E-05 | -1.342  |
| Fatty Acid $\alpha$ -oxidation                      | 3.38844E-07 | -1.342  |
| IL-9 Signaling                                      | 6.60693E-08 | -1.342  |
| Osteoarthritis Pathway                              | 3.31131E-08 | -1.265  |
| PPAR $\alpha$ /RXR $\alpha$ Activation              | 0.00030903  | -1.134  |

| Ingenuity Canonical Pathways                                          | P-value     | z-score |
|-----------------------------------------------------------------------|-------------|---------|
| Production of Nitric Oxide and Reactive Oxygen Species in Macrophages | 0.000295121 | -1.134  |
| White Adipose Tissue Browning Pathway                                 | 4.2658E-05  | -1.134  |
| LXR/RXR Activation                                                    | 1.20226E-08 | -1.134  |
| Leukocyte Extravasation Signaling                                     | 0.041686938 | -1      |
| B Cell Receptor Signaling                                             | 0.036307805 | -1      |
| eNOS Signaling                                                        | 0.02630268  | -1      |
| HOTAIR Regulatory Pathway                                             | 0.021379621 | -1      |
| Coronavirus Pathogenesis Pathway                                      | 0.016982437 | -1      |
| P2Y Purigenic Receptor Signaling Pathway                              | 0.012302688 | -1      |
| MSP-RON Signaling In Macrophages Pathway                              | 0.007079458 | -1      |
| Role of MAPK Signaling in Promoting the Pathogenesis of Influenza     | 0.006456542 | -1      |
| PDGF Signaling                                                        | 0.003090295 | -1      |
| Role of MAPK Signaling in Inhibiting the Pathogenesis of Influenza    | 0.001698244 | -1      |
| MIF Regulation of Innate Immunity                                     | 0.00020893  | -1      |
| Apelin Pancreas Signaling Pathway                                     | 0.00020893  | -1      |
| Dopamine Degradation                                                  | 0.000190546 | -1      |
| MIF-mediated Glucocorticoid Regulation                                | 8.70964E-05 | -1      |
| Tryptophan Degradation X (Mammalian, via Tryptamine)                  | 7.76247E-05 | -1      |
| Putrescine Degradation III                                            | 6.0256E-05  | -1      |
| The Visual Cycle                                                      | 5.37032E-05 | -1      |
| Histamine Degradation                                                 | 4.67735E-05 | -1      |
| IGF-1 Signaling                                                       | 6.91831E-05 | -0.816  |
| Apelin Adipocyte Signaling Pathway                                    | 1.62181E-05 | -0.816  |

| Ingenuity Canonical Pathways                         | P-value     | z-score |
|------------------------------------------------------|-------------|---------|
| Growth Hormone Signaling                             | 9.54993E-06 | -0.816  |
| Triacylglycerol Biosynthesis                         | 1.69824E-06 | -0.816  |
| Type II Diabetes Mellitus Signaling                  | 7.94328E-10 | -0.816  |
| STAT3 Pathway                                        | 3.16228E-06 | -0.707  |
| JAK/Stat Signaling                                   | 0.000177828 | -0.447  |
| Phosphatidylglycerol Biosynthesis II (Non-plastidic) | 5.24807E-06 | -0.447  |
| CDP-diacylglycerol Biosynthesis I                    | 2.23872E-06 | -0.447  |
| Insulin Receptor Signaling                           | 4.67735E-05 | -0.378  |
| PPAR Signaling                                       | 0.004897788 | 1       |
| PTEN Signaling                                       | 0.002137962 | 1       |
| Endocannabinoid Cancer Inhibition Pathway            | 0.003019952 | 2.236   |

Supplementary Table 12 Results of diseases and functions analysis based on 162 lipid metabolism-related DEGs

| Category                                       | p-value           | Category                                              | p-value           |
|------------------------------------------------|-------------------|-------------------------------------------------------|-------------------|
| Lipid Metabolism                               | 5.58E-74-7.7E-10  | Organ Morphology                                      | 9.45E-19-6.88E-10 |
| Small Molecule Biochemistry                    | 5.58E-74-9.67E-10 | Hepatic System Development and Function               | 1.55E-18-2.67E-11 |
| Molecular Transport                            | 1.3E-59-7.7E-10   | Renal and Urological Disease                          | 2.52E-18-3.99E-10 |
| Vitamin and Mineral Metabolism                 | 7.91E-43-3.59E-10 | Cellular Movement                                     | 2.69E-18-8.15E-10 |
| Energy Production                              | 1.37E-39-2.1E-10  | Reproductive System Disease                           | 3.25E-18-4.27E-10 |
| Metabolic Disease                              | 1.49E-38-5.5E-10  | Immune Cell Trafficking                               | 2.36E-17-8.77E-10 |
| Organismal Injury and Abnormalities            | 1.49E-38-9.96E-10 | Cell-To-Cell Signaling and Interaction                | 3.17E-17-6.38E-10 |
| Carbohydrate Metabolism                        | 2.8E-38-9.67E-10  | Organismal Functions                                  | 3.65E-16-5.69E-10 |
| Endocrine System Disorders                     | 3.09E-29-9.96E-10 | Neurological Disease                                  | 4.83E-16-9.15E-10 |
| Gastrointestinal Disease                       | 3.09E-29-7.22E-10 | Organ Development                                     | 8.16E-16-5.56E-10 |
| Organismal Development                         | 1.44E-28-9.14E-10 | Skeletal and Muscular System Development and Function | 8.16E-16-7.44E-10 |
| Hepatic System Disease                         | 3.85E-28-5.5E-10  | Inflammatory Disease                                  | 1.33E-15-7.91E-12 |
| Connective Tissue Development and Function     | 1.08E-25-8.99E-10 | Organismal Survival                                   | 4.05E-15-9.24E-12 |
| Tissue Morphology                              | 1.08E-25-9.11E-10 | Drug Metabolism                                       | 5.06E-15-8.79E-12 |
| Protein Synthesis                              | 9.92E-25-3.29E-10 | Hematological System Development and Function         | 2.02E-14-8.77E-10 |
| Cancer                                         | 1.96E-24-9.96E-10 | Reproductive System Development and Function          | 4.75E-14-5.82E-14 |
| Cellular Function and Maintenance              | 2.15E-22-3.65E-10 | Psychological Disorders                               | 1.79E-13-4.91E-13 |
| Digestive System Development and Function      | 5.14E-22-9.15E-10 | Cell Signaling                                        | 3.03E-13-4.77E-10 |
| Cardiovascular System Development and Function | 6.13E-22-9.92E-10 | Nucleic Acid Metabolism                               | 3.03E-13-3.92E-10 |
| Endocrine System Development and Function      | 7.18E-22-8.79E-12 | Infectious Diseases                                   | 3.66E-13-3.66E-13 |
| Tissue Development                             | 1.03E-21-9.92E-10 | Protein Trafficking                                   | 5.83E-13-5.83E-13 |
| Nutritional Disease                            | 5.84E-21-1.34E-11 | DNA Replication, Recombination, and Repair            | 9.63E-13-9.63E-13 |
| Cell Morphology                                | 1.04E-20-4.17E-10 | Respiratory System Development and Function           | 1.57E-12-1.97E-10 |



| Category                          | p-value           | Category                                             | p-value           |
|-----------------------------------|-------------------|------------------------------------------------------|-------------------|
| Cell Death and Survival           | 1.57E-20-6.94E-10 | Tumor Morphology                                     | 2.8E-12-8.04E-10  |
| Connective Tissue Disorders       | 2.13E-20-5.17E-10 | Renal and Urological System Development and Function | 2.98E-12-4.37E-12 |
| Developmental Disorder            | 2.13E-20-1.56E-12 | Cell Cycle                                           | 6.03E-12-2.59E-10 |
| Hereditary Disorder               | 2.13E-20-1.69E-11 | Nervous System Development and Function              | 6.35E-12-5.99E-11 |
| Immunological Disease             | 2.13E-20-1.61E-11 | Free Radical Scavenging                              | 1.63E-11-4.15E-10 |
| Skeletal and Muscular Disorders   | 2.13E-20-7.71E-10 | Post-Translational Modification                      | 2.32E-11-4.77E-10 |
| Hematological Disease             | 3.51E-20-3.01E-10 | Respiratory Disease                                  | 4.47E-11-5.17E-10 |
| Cardiovascular Disease            | 7.48E-20-8.28E-10 | Hair and Skin Development and Function               | 5.68E-11-5.68E-11 |
| Inflammatory Response             | 8.07E-20-8.77E-10 | Gene Expression                                      | 5.84E-11-5.84E-11 |
| Cellular Development              | 1.23E-19-9.14E-10 | Cellular Assembly and Organization                   | 5.19E-10-5.19E-10 |
| Cellular Growth and Proliferation | 1.23E-19-9.14E-10 | Behavior                                             | 9.15E-10-9.15E-10 |
| Embryonic Development             | 5.72E-19-9.14E-10 |                                                      |                   |

Supplementary Table 13 GO annotation based on 13 candidate prognosis-related lipid metabolism genes

| ONTOLOGY | ID         | Description                                       | GeneRatio | BgRatio   | p.adjust    | geneID                                | Count |
|----------|------------|---------------------------------------------------|-----------|-----------|-------------|---------------------------------------|-------|
| BP       | GO:0045834 | positive regulation of lipid metabolic process    | 5/13      | 146/18670 | 2.11E-05    | ABCD2/FGF2/CCDC3/SORBS1/HSD17B13      | 5     |
| BP       | GO:0046890 | regulation of lipid biosynthetic process          | 5/13      | 198/18670 | 3.43E-05    | ABCD2/GPAM/CCDC3/SORBS1/HSD17B13      | 5     |
| BP       | GO:0019216 | regulation of lipid metabolic process             | 6/13      | 410/18670 | 3.43E-05    | ABCD2/FGF2/GPAM/CCDC3/SORBS1/HSD17B13 | 6     |
| BP       | GO:0046889 | positive regulation of lipid biosynthetic process | 4/13      | 84/18670  | 4.18E-05    | ABCD2/CCDC3/SORBS1/HSD17B13           | 4     |
| BP       | GO:0046486 | glycerolipid metabolic process                    | 5/13      | 414/18670 | 0.000735175 | FGF2/GPAM/FABP4/PCK1/FAM126A          | 5     |
| BP       | GO:1901617 | organic hydroxy compound biosynthetic process     | 4/13      | 266/18670 | 0.00274195  | FGF2/GPAM/PCK1/PLTP                   | 4     |
| BP       | GO:0006641 | triglyceride metabolic process                    | 3/13      | 105/18670 | 0.004284162 | GPAM/FABP4/PCK1                       | 3     |
| BP       | GO:0006639 | acylglycerol metabolic process                    | 3/13      | 129/18670 | 0.005952303 | GPAM/FABP4/PCK1                       | 3     |
| BP       | GO:0006638 | neutral lipid metabolic process                   | 3/13      | 130/18670 | 0.005952303 | GPAM/FABP4/PCK1                       | 3     |
| BP       | GO:0006066 | alcohol metabolic process                         | 4/13      | 370/18670 | 0.005952303 | LEPR/FGF2/GPAM/PCK1                   | 4     |
| BP       | GO:0062012 | regulation of small molecule metabolic process    | 4/13      | 429/18670 | 0.008116479 | LEPR/ABCD2/GPAM/SORBS1                | 4     |
| BP       | GO:0034368 | protein-lipid complex remodeling                  | 2/13      | 28/18670  | 0.008116479 | PLTP/GPIHBP1                          | 2     |
| BP       | GO:0034369 | plasma lipoprotein particle remodeling            | 2/13      | 28/18670  | 0.008116479 | PLTP/GPIHBP1                          | 2     |
| BP       | GO:0034367 | protein-containing complex remodeling             | 2/13      | 29/18670  | 0.008116479 | PLTP/GPIHBP1                          | 2     |
| BP       | GO:0046165 | alcohol biosynthetic process                      | 3/13      | 175/18670 | 0.00910339  | FGF2/GPAM/PCK1                        | 3     |
| BP       | GO:0006006 | glucose metabolic process                         | 3/13      | 204/18670 | 0.012230425 | LEPR/SORBS1/PCK1                      | 3     |
| BP       | GO:0016051 | carbohydrate biosynthetic process                 | 3/13      | 208/18670 | 0.012230425 | LEPR/SORBS1/PCK1                      | 3     |
| BP       | GO:0019432 | triglyceride biosynthetic process                 | 2/13      | 41/18670  | 0.012230425 | GPAM/PCK1                             | 2     |
| BP       | GO:0046460 | neutral lipid biosynthetic process                | 2/13      | 43/18670  | 0.012230425 | GPAM/PCK1                             | 2     |
| BP       | GO:0046463 | acylglycerol biosynthetic process                 | 2/13      | 43/18670  | 0.012230425 | GPAM/PCK1                             | 2     |
| BP       | GO:0044242 | cellular lipid catabolic process                  | 3/13      | 217/18670 | 0.012230425 | ABCD2/FABP4/PCK1                      | 3     |
| BP       | GO:0071827 | plasma lipoprotein particle organization          | 2/13      | 45/18670  | 0.012515633 | PLTP/GPIHBP1                          | 2     |
| BP       | GO:0071825 | protein-lipid complex subunit organization        | 2/13      | 49/18670  | 0.014198339 | PLTP/GPIHBP1                          | 2     |
| BP       | GO:0019318 | hexose metabolic process                          | 3/13      | 244/18670 | 0.015072326 | LEPR/SORBS1/PCK1                      | 3     |
| BP       | GO:0045017 | glycerolipid biosynthetic process                 | 3/13      | 251/18670 | 0.015711832 | FGF2/GPAM/PCK1                        | 3     |
| BP       | GO:0006027 | glycosaminoglycan catabolic process               | 2/13      | 61/18670  | 0.018290947 | FGF2/SDC1                             | 2     |

| ONTOLOGY | ID         | Description                                       | GeneRatio | BgRatio   | p.adjust    | geneID            | Count |
|----------|------------|---------------------------------------------------|-----------|-----------|-------------|-------------------|-------|
| BP       | GO:0016054 | organic acid catabolic process                    | 3/13      | 275/18670 | 0.018290947 | ABCD2/FGF2/PCK1   | 3     |
| BP       | GO:0046395 | carboxylic acid catabolic process                 | 3/13      | 275/18670 | 0.018290947 | ABCD2/FGF2/PCK1   | 3     |
| BP       | GO:0044262 | cellular carbohydrate metabolic process           | 3/13      | 282/18670 | 0.018697182 | LEPR/SORBS1/PCK1  | 3     |
| BP       | GO:0006026 | aminoglycan catabolic process                     | 2/13      | 65/18670  | 0.018697182 | FGF2/SDC1         | 2     |
| BP       | GO:0005996 | monosaccharide metabolic process                  | 3/13      | 287/18670 | 0.018697182 | LEPR/SORBS1/PCK1  | 3     |
| BP       | GO:0071356 | cellular response to tumor necrosis factor        | 3/13      | 291/18670 | 0.018853098 | CCDC3/FABP4/PCK1  | 3     |
| BP       | GO:0060193 | positive regulation of lipase activity            | 2/13      | 72/18670  | 0.020072585 | FGF2/GPIHBP1      | 2     |
| BP       | GO:0034612 | response to tumor necrosis factor                 | 3/13      | 312/18670 | 0.020072585 | CCDC3/FABP4/PCK1  | 3     |
| BP       | GO:0005977 | glycogen metabolic process                        | 2/13      | 74/18670  | 0.020072585 | LEPR/SORBS1       | 2     |
| BP       | GO:0006073 | cellular glucan metabolic process                 | 2/13      | 75/18670  | 0.020072585 | LEPR/SORBS1       | 2     |
| BP       | GO:0044042 | glucan metabolic process                          | 2/13      | 75/18670  | 0.020072585 | LEPR/SORBS1       | 2     |
| BP       | GO:0046173 | polyol biosynthetic process                       | 2/13      | 75/18670  | 0.020072585 | FGF2/PCK1         | 2     |
| BP       | GO:0006650 | glycerophospholipid metabolic process             | 3/13      | 319/18670 | 0.020167263 | FGF2/GPAM/FAM126A | 3     |
| BP       | GO:0016042 | lipid catabolic process                           | 3/13      | 333/18670 | 0.022203188 | ABCD2/FABP4/PCK1  | 3     |
| BP       | GO:0006094 | gluconeogenesis                                   | 2/13      | 82/18670  | 0.022203188 | LEPR/PCK1         | 2     |
| BP       | GO:0019319 | hexose biosynthetic process                       | 2/13      | 85/18670  | 0.023260166 | LEPR/PCK1         | 2     |
| BP       | GO:0034637 | cellular carbohydrate biosynthetic process        | 2/13      | 86/18670  | 0.023260166 | SORBS1/PCK1       | 2     |
| BP       | GO:0006112 | energy reserve metabolic process                  | 2/13      | 87/18670  | 0.023260166 | LEPR/SORBS1       | 2     |
| BP       | GO:0043255 | regulation of carbohydrate biosynthetic process   | 2/13      | 90/18670  | 0.023724915 | LEPR/SORBS1       | 2     |
| BP       | GO:0046364 | monosaccharide biosynthetic process               | 2/13      | 91/18670  | 0.023724915 | LEPR/PCK1         | 2     |
| BP       | GO:0042632 | cholesterol homeostasis                           | 2/13      | 96/18670  | 0.023724915 | FABP4/GPIHBP1     | 2     |
| BP       | GO:0001657 | ureteric bud development                          | 2/13      | 97/18670  | 0.023724915 | FGF2/SDC1         | 2     |
| BP       | GO:0051591 | response to cAMP                                  | 2/13      | 97/18670  | 0.023724915 | SDC1/PCK1         | 2     |
| BP       | GO:0055092 | sterol homeostasis                                | 2/13      | 97/18670  | 0.023724915 | FABP4/GPIHBP1     | 2     |
| BP       | GO:0120162 | positive regulation of cold-induced thermogenesis | 2/13      | 97/18670  | 0.023724915 | LEPR/FABP4        | 2     |
| BP       | GO:0060191 | regulation of lipase activity                     | 2/13      | 98/18670  | 0.023724915 | FGF2/GPIHBP1      | 2     |

| ONTOLOGY | ID         | Description                                             | GeneRatio | BgRatio   | p.adjust    | geneID            | Count |
|----------|------------|---------------------------------------------------------|-----------|-----------|-------------|-------------------|-------|
| BP       | GO:0072163 | mesonephric epithelium development                      | 2/13      | 98/18670  | 0.023724915 | FGF2/SDC1         | 2     |
| BP       | GO:0072164 | mesonephric tubule development                          | 2/13      | 98/18670  | 0.023724915 | FGF2/SDC1         | 2     |
| BP       | GO:0006631 | fatty acid metabolic process                            | 3/13      | 383/18670 | 0.023724915 | ABCD2/GPAM/PCK1   | 3     |
| BP       | GO:0048545 | response to steroid hormone                             | 3/13      | 383/18670 | 0.023724915 | GPAM/SDC1/PCK1    | 3     |
| BP       | GO:0097006 | regulation of plasma lipoprotein particle levels        | 2/13      | 101/18670 | 0.024105017 | PLTP/GPIHBP1      | 2     |
| BP       | GO:0001823 | mesonephros development                                 | 2/13      | 102/18670 | 0.024153718 | FGF2/SDC1         | 2     |
| BP       | GO:0044264 | cellular polysaccharide metabolic process               | 2/13      | 103/18670 | 0.024205015 | LEPR/SORBS1       | 2     |
| BP       | GO:0001523 | retinoid metabolic process                              | 2/13      | 104/18670 | 0.024258772 | SDC1/GPIHBP1      | 2     |
| BP       | GO:0009062 | fatty acid catabolic process                            | 2/13      | 108/18670 | 0.025700721 | ABCD2/PCK1        | 2     |
| BP       | GO:0016101 | diterpenoid metabolic process                           | 2/13      | 110/18670 | 0.026215261 | SDC1/GPIHBP1      | 2     |
| BP       | GO:0010906 | regulation of glucose metabolic process                 | 2/13      | 112/18670 | 0.026729216 | LEPR/SORBS1       | 2     |
| BP       | GO:0005976 | polysaccharide metabolic process                        | 2/13      | 114/18670 | 0.027242576 | LEPR/SORBS1       | 2     |
| BP       | GO:0006644 | phospholipid metabolic process                          | 3/13      | 430/18670 | 0.028405927 | FGF2/GPAM/FAM126A | 3     |
| BP       | GO:0006721 | terpenoid metabolic process                             | 2/13      | 120/18670 | 0.029215035 | SDC1/GPIHBP1      | 2     |
| BP       | GO:0044282 | small molecule catabolic process                        | 3/13      | 445/18670 | 0.030238361 | ABCD2/FGF2/PCK1   | 3     |
| BP       | GO:0019751 | polyol metabolic process                                | 2/13      | 124/18670 | 0.030238361 | FGF2/PCK1         | 2     |
| BP       | GO:0042552 | myelination                                             | 2/13      | 132/18670 | 0.032784582 | ABCD2/FAM126A     | 2     |
| BP       | GO:0072329 | monocarboxylic acid catabolic process                   | 2/13      | 132/18670 | 0.032784582 | ABCD2/PCK1        | 2     |
| BP       | GO:0007272 | ensheathment of neurons                                 | 2/13      | 134/18670 | 0.032784582 | ABCD2/FAM126A     | 2     |
| BP       | GO:0008366 | axon ensheathment                                       | 2/13      | 134/18670 | 0.032784582 | ABCD2/FAM126A     | 2     |
| BP       | GO:0046683 | response to organophosphorus                            | 2/13      | 134/18670 | 0.032784582 | SDC1/PCK1         | 2     |
| BP       | GO:0010675 | regulation of cellular carbohydrate metabolic process   | 2/13      | 137/18670 | 0.033771672 | LEPR/SORBS1       | 2     |
| BP       | GO:0006720 | isoprenoid metabolic process                            | 2/13      | 139/18670 | 0.034278089 | SDC1/GPIHBP1      | 2     |
| BP       | GO:0072073 | kidney epithelium development                           | 2/13      | 140/18670 | 0.034303846 | FGF2/SDC1         | 2     |
| BP       | GO:0062013 | positive regulation of small molecule metabolic process | 2/13      | 141/18670 | 0.034332038 | ABCD2/SORBS1      | 2     |
| BP       | GO:0106106 | cold-induced thermogenesis                              | 2/13      | 143/18670 | 0.034395342 | LEPR/FABP4        | 2     |

| ONTOLOGY | ID         | Description                                                           | GeneRatio | BgRatio   | p.adjust    | geneID        | Count |
|----------|------------|-----------------------------------------------------------------------|-----------|-----------|-------------|---------------|-------|
| BP       | GO:0120161 | regulation of cold-induced thermogenesis                              | 2/13      | 143/18670 | 0.034395342 | LEPR/FABP4    | 2     |
| BP       | GO:0051384 | response to glucocorticoid                                            | 2/13      | 146/18670 | 0.035368937 | SDC1/PCK1     | 2     |
| BP       | GO:0014074 | response to purine-containing compound                                | 2/13      | 149/18670 | 0.036344852 | SDC1/PCK1     | 2     |
| BP       | GO:0008203 | cholesterol metabolic process                                         | 2/13      | 150/18670 | 0.036372506 | LEPR/GPAM     | 2     |
| BP       | GO:0055088 | lipid homeostasis                                                     | 2/13      | 151/18670 | 0.036402337 | FABP4/GPIHBP1 | 2     |
| BP       | GO:1990845 | adaptive thermogenesis                                                | 2/13      | 154/18670 | 0.037373249 | LEPR/FABP4    | 2     |
| BP       | GO:0030203 | glycosaminoglycan metabolic process                                   | 2/13      | 160/18670 | 0.039783582 | FGF2/SDC1     | 2     |
| BP       | GO:1902652 | secondary alcohol metabolic process                                   | 2/13      | 161/18670 | 0.03979997  | LEPR/GPAM     | 2     |
| BP       | GO:0031960 | response to corticosteroid                                            | 2/13      | 162/18670 | 0.039818656 | SDC1/PCK1     | 2     |
| BP       | GO:0016125 | sterol metabolic process                                              | 2/13      | 166/18670 | 0.041275548 | LEPR/GPAM     | 2     |
| BP       | GO:0006022 | aminoglycan metabolic process                                         | 2/13      | 170/18670 | 0.042741294 | FGF2/SDC1     | 2     |
| BP       | GO:0001659 | temperature homeostasis                                               | 2/13      | 173/18670 | 0.043724316 | LEPR/FABP4    | 2     |
| BP       | GO:0046488 | phosphatidylinositol metabolic process                                | 2/13      | 174/18670 | 0.043729508 | FGF2/FAM126A  | 2     |
| BP       | GO:0032000 | positive regulation of fatty acid beta-oxidation                      | 1/13      | 10/18670  | 0.044774836 | ABCD2         | 1     |
| BP       | GO:0033210 | leptin-mediated signaling pathway                                     | 1/13      | 10/18670  | 0.044774836 | LEPR          | 1     |
| BP       | GO:0035768 | endothelial cell chemotaxis to fibroblast growth factor               | 1/13      | 10/18670  | 0.044774836 | FGF2          | 1     |
| BP       | GO:0051006 | positive regulation of lipoprotein lipase activity                    | 1/13      | 10/18670  | 0.044774836 | GPIHBP1       | 1     |
| BP       | GO:0052646 | alditol phosphate metabolic process                                   | 1/13      | 10/18670  | 0.044774836 | GPAM          | 1     |
| BP       | GO:1990535 | neuron projection maintenance                                         | 1/13      | 10/18670  | 0.044774836 | ABCD2         | 1     |
| BP       | GO:2000544 | regulation of endothelial cell chemotaxis to fibroblast growth factor | 1/13      | 10/18670  | 0.044774836 | FGF2          | 1     |
| BP       | GO:1901136 | carbohydrate derivative catabolic process                             | 2/13      | 192/18670 | 0.046846379 | FGF2/SDC1     | 2     |
| BP       | GO:0010986 | positive regulation of lipoprotein particle clearance                 | 1/13      | 11/18670  | 0.046846379 | GPIHBP1       | 1     |
| BP       | GO:0035766 | cell chemotaxis to fibroblast growth factor                           | 1/13      | 11/18670  | 0.046846379 | FGF2          | 1     |
| BP       | GO:0061365 | positive regulation of triglyceride lipase activity                   | 1/13      | 11/18670  | 0.046846379 | GPIHBP1       | 1     |
| BP       | GO:1904847 | regulation of cell chemotaxis to fibroblast growth factor             | 1/13      | 11/18670  | 0.046846379 | FGF2          | 1     |
| BP       | GO:0006109 | regulation of carbohydrate metabolic process                          | 2/13      | 199/18670 | 0.049596083 | LEPR/SORBS1   | 2     |

| ONTOLOGY | ID         | Description                           | GeneRatio | BgRatio   | p.adjust    | geneID            | Count |
|----------|------------|---------------------------------------|-----------|-----------|-------------|-------------------|-------|
| BP       | GO:0042659 | regulation of cell fate specification | 1/13      | 12/18670  | 0.04964282  | FGF2              | 1     |
| BP       | GO:0071468 | cellular response to acidic pH        | 1/13      | 12/18670  | 0.04964282  | PCK1              | 1     |
| CC       | GO:0005811 | lipid droplet                         | 2/13      | 81/19717  | 0.038740172 | FABP4/HSD17B13    | 2     |
| CC       | GO:0009897 | external side of plasma membrane      | 3/13      | 393/19717 | 0.038740172 | LEPR/SDC1/GPIHBP1 | 3     |

Supplementary Table 14 KEGG pathway enrichment analysis based on 13 candidate prognosis-related lipid metabolism genes

| ID       | Description                     | GeneRatio | BgRatio | P value  | p.adjust | qvalue   | Gene ID              | Count |
|----------|---------------------------------|-----------|---------|----------|----------|----------|----------------------|-------|
| hsa03320 | PPAR signaling pathway          | 44295.00  | 76/8101 | 8.70E-07 | 3.39E-05 | 2.84E-05 | 2167/10580/5105/5360 | 4     |
| hsa04920 | Adipocytokine signaling pathway | 44236.00  | 69/8101 | 0.002477 | 0.048294 | 0.040408 | 3953/5105            | 2     |

Supplementary Table 15 The results of multivariate Cox regression analysis

| ID     | coef         | HR          | HR.95L      | HR.95H      | P value     |
|--------|--------------|-------------|-------------|-------------|-------------|
| SDC1   | 0.218565078  | 1.24428999  | 1.013572167 | 1.527525744 | 0.036725806 |
| SORBS1 | -0.263710941 | 0.768195561 | 0.595391443 | 0.99115368  | 0.04252889  |



Supplementary Table 16 Characteristics of BRCA subjects in the self-contained cohort

| Feature          | Group | Number | t      | p-value |
|------------------|-------|--------|--------|---------|
| fustate          | Death | 5      | 1.25   | 0.4296  |
|                  | Alive | 45     |        |         |
| ER_positive_rate | 0%    | 18     | 2.5121 | 0.0273  |
|                  | 1%    | 1      |        |         |
|                  | 10%   | 1      |        |         |
|                  | 100%  | 1      |        |         |
|                  | 20%   | 2      |        |         |
|                  | 30%   | 2      |        |         |
|                  | 40%   | 1      |        |         |
|                  | 55%   | 1      |        |         |
|                  | 60%   | 1      |        |         |
|                  | 70%   | 1      |        |         |
|                  | 80%   | 7      |        |         |
|                  | 85%   | 1      |        |         |
|                  | 90%   | 13     |        |         |
| PR_positive_rate | 0%    | 19     | 2.8497 | 0.01286 |
|                  | 1%    | 1      |        |         |
|                  | 10%   | 2      |        |         |
|                  | 100%  | 1      |        |         |
|                  | 15%   | 1      |        |         |

| Feature          | Group    | Number | t      | p-value |
|------------------|----------|--------|--------|---------|
| Her-2_status     | 20%      | 2      | 2.5    | 0.2422  |
|                  | 25%      | 1      |        |         |
|                  | 30%      | 3      |        |         |
|                  | 40%      | 1      |        |         |
|                  | 5%       | 5      |        |         |
|                  | 60%      | 2      |        |         |
|                  | 70%      | 3      |        |         |
|                  | 80%      | 4      |        |         |
|                  | 90%      | 4      |        |         |
|                  | 95%      | 1      |        |         |
| Ki-67_expression | negative | 35     | 3.3061 | 0.007   |
|                  | Positive | 15     |        |         |
| Ki-67_expression | 10%      | 4      | 3.3061 | 0.007   |
|                  | 15%      | 3      |        |         |
|                  | 20%      | 25     |        |         |
|                  | 30%      | 14     |        |         |
|                  | 35%      | 1      |        |         |
|                  | 40%      | 12     |        |         |
|                  | 45%      | 1      |        |         |
|                  | 50%      | 2      |        |         |
| 60%              | 1        |        |        |         |

| Feature          | Group   | Number | t      | p-value |
|------------------|---------|--------|--------|---------|
| Lymph_node_stage | 70%     | 4      | 4.5392 | 0.02    |
|                  | 80%     | 2      |        |         |
|                  | N0      | 19     |        |         |
|                  | N1      | 15     |        |         |
|                  | N2      | 9      |        |         |
| Tumor_size       | N3      | 7      | 2.8262 | 0.1057  |
|                  | T1      | 21     |        |         |
|                  | T2      | 24     |        |         |
|                  | T3      | 5      |        |         |
| Age              | <60year | 45     | 1.25   | 0.4296  |
|                  | >60year | 5      |        |         |
| Metastasis       | none    | 23     | 12.5   | 0.0508  |
|                  | yes     | 27     |        |         |
| Diseased_side    | L       | 24     | 25     | 0.0254  |
|                  | R       | 26     |        |         |

Supplementary Table 17 Compounds predicted by CMap analysis to potentially target prognostic genes

| Cmap name           | Mean   | n  | Enrichment | p       | Specificity | Percent non-null |
|---------------------|--------|----|------------|---------|-------------|------------------|
| vorinostat          | -0.617 | 12 | -0.617     | 0       | 0.2566      | 83               |
| amitriptyline       | 0.671  | 6  | 0.807      | 0.00008 | 0.0097      | 100              |
| 0297417-0002B       | -0.804 | 3  | -0.942     | 0.00028 | 0.0164      | 100              |
| Prestwick-559       | -0.798 | 3  | -0.937     | 0.00038 | 0.0061      | 100              |
| scriptaid           | -0.806 | 3  | -0.909     | 0.00134 | 0.0417      | 100              |
| MG-262              | -0.817 | 3  | -0.907     | 0.00152 | 0.0787      | 100              |
| meglumine           | 0.641  | 4  | 0.82       | 0.00183 | 0           | 100              |
| suramin sodium      | 0.687  | 4  | 0.804      | 0.00277 | 0           | 100              |
| cloxacillin         | 0.624  | 4  | 0.793      | 0.00362 | 0.0068      | 100              |
| Prestwick-1103      | 0.636  | 4  | 0.791      | 0.00372 | 0.0186      | 100              |
| fludroxycortide     | 0.56   | 5  | 0.722      | 0.00378 | 0           | 80               |
| captopril           | 0.45   | 5  | 0.721      | 0.00384 | 0           | 80               |
| thiostrepton        | -0.681 | 4  | -0.79      | 0.00398 | 0.037       | 100              |
| naftidrofuryl       | 0.584  | 4  | 0.783      | 0.00412 | 0           | 100              |
| dydrogesterone      | -0.727 | 4  | -0.786     | 0.00418 | 0           | 100              |
| aciclovir           | 0.575  | 6  | 0.659      | 0.00465 | 0.0124      | 83               |
| econazole           | 0.489  | 4  | 0.771      | 0.00521 | 0.0718      | 75               |
| Prestwick-1082      | 0.659  | 3  | 0.853      | 0.00605 | 0.0263      | 100              |
| kinetin             | 0.343  | 4  | 0.749      | 0.0076  | 0           | 50               |
| vinblastine         | 0.696  | 3  | 0.841      | 0.00787 | 0.0387      | 100              |
| withaferin A        | -0.7   | 4  | -0.746     | 0.00826 | 0.1148      | 100              |
| sulconazole         | -0.714 | 4  | -0.742     | 0.00871 | 0.0197      | 100              |
| atracurium besilate | 0.681  | 3  | 0.836      | 0.00889 | 0.0173      | 100              |

| Cmap name                      | Mean   | n | Enrichment | p       | Specificity | Percent non-null |
|--------------------------------|--------|---|------------|---------|-------------|------------------|
| rotenone                       | -0.658 | 4 | -0.74      | 0.00891 | 0.0284      | 100              |
| mephenytoin                    | 0.553  | 4 | 0.733      | 0.00991 | 0.0237      | 75               |
| acenocoumarol                  | 0.4    | 5 | 0.669      | 0.01047 | 0.013       | 60               |
| guaifenesin                    | -0.583 | 6 | -0.614     | 0.01059 | 0.0258      | 83               |
| (+)-isoprenaline               | 0.548  | 4 | 0.729      | 0.01076 | 0.0052      | 75               |
| pheneticillin                  | 0.537  | 4 | 0.729      | 0.01082 | 0.0315      | 75               |
| guanabenz                      | 0.373  | 5 | 0.667      | 0.01089 | 0.0769      | 60               |
| fludrocortisone                | 0.379  | 8 | 0.536      | 0.01119 | 0.1706      | 75               |
| edrophonium chloride           | 0.475  | 5 | 0.664      | 0.01131 | 0           | 60               |
| luteolin                       | -0.681 | 4 | -0.722     | 0.01211 | 0.0571      | 100              |
| myosmine                       | 0.465  | 6 | 0.6        | 0.01317 | 0.0611      | 66               |
| epivincamine                   | -0.711 | 4 | -0.715     | 0.01333 | 0.0402      | 100              |
| estropipate                    | 0.402  | 4 | 0.712      | 0.01396 | 0.018       | 50               |
| tinidazole                     | -0.494 | 6 | -0.602     | 0.01398 | 0           | 66               |
| minocycline                    | 0.358  | 5 | 0.652      | 0.01416 | 0.0128      | 60               |
| cefactor                       | 0.343  | 4 | 0.706      | 0.01556 | 0.0139      | 50               |
| flucytosine                    | -0.716 | 4 | -0.704     | 0.01585 | 0.0173      | 100              |
| 16,16-dimethylprostaglandin E2 | 0.624  | 3 | 0.801      | 0.016   | 0.0419      | 100              |
| orlistat                       | -0.458 | 5 | -0.636     | 0.01646 | 0.0058      | 80               |
| metaraminol                    | 0.334  | 4 | 0.7        | 0.01669 | 0.0075      | 50               |
| 0317956-0000                   | -0.383 | 8 | -0.507     | 0.0198  | 0.0961      | 50               |
| etyndiol                       | 0.596  | 4 | 0.682      | 0.02184 | 0.0559      | 75               |
| trimethadione                  | -0.459 | 4 | -0.683     | 0.02218 | 0.0238      | 75               |

| Cmap name                   | Mean   | n | Enrichment | p       | Specificity | Percent non-null |
|-----------------------------|--------|---|------------|---------|-------------|------------------|
| fenoterol                   | 0.442  | 3 | 0.774      | 0.02332 | 0.0315      | 66               |
| naringenin                  | 0.548  | 4 | 0.678      | 0.02349 | 0.1596      | 75               |
| carbachol                   | -0.589 | 4 | -0.679     | 0.02371 | 0.052       | 75               |
| pralidoxime                 | 0.346  | 4 | 0.676      | 0.02421 | 0.0567      | 50               |
| pyridoxine                  | -0.571 | 4 | -0.674     | 0.02532 | 0.0809      | 75               |
| 0225151-0000                | -0.713 | 3 | -0.768     | 0.02574 | 0.0233      | 100              |
| hydrastinine                | 0.356  | 5 | 0.611      | 0.02661 | 0.028       | 80               |
| W-13                        | 0.778  | 2 | 0.886      | 0.027   | 0.0245      | 100              |
| mycophenolic acid           | 0.472  | 3 | 0.756      | 0.02854 | 0.1709      | 66               |
| danazol                     | 0.358  | 4 | 0.664      | 0.02875 | 0.0242      | 75               |
| gliclazide                  | -0.503 | 4 | -0.656     | 0.03219 | 0.12        | 75               |
| latamoxef                   | -0.703 | 3 | -0.744     | 0.03429 | 0.0345      | 100              |
| aminocaproic acid           | -0.633 | 3 | -0.743     | 0.03441 | 0.0408      | 100              |
| tacrine                     | 0.281  | 4 | 0.652      | 0.03445 | 0.0126      | 50               |
| probucol                    | 0.219  | 6 | 0.541      | 0.03593 | 0.0067      | 50               |
| thiocolchicoside            | -0.521 | 4 | -0.647     | 0.0367  | 0.0427      | 75               |
| sulfapyridine               | 0.338  | 4 | 0.648      | 0.0368  | 0.0201      | 50               |
| testosterone                | 0.378  | 5 | 0.584      | 0.03861 | 0.0382      | 80               |
| nitrofural                  | -0.347 | 4 | -0.642     | 0.03945 | 0.0629      | 50               |
| arachidonyltrifluoromethane | 0.721  | 2 | 0.858      | 0.04088 | 0.0377      | 100              |
| TTNPB                       | 0.653  | 2 | 0.857      | 0.04143 | 0.0311      | 100              |
| tranlycypromine             | -0.407 | 5 | -0.575     | 0.04147 | 0.12        | 80               |
| PF-00539745-00              | 0.447  | 3 | 0.72       | 0.04319 | 0.0565      | 66               |

---

| Cmap name           | Mean   | n | Enrichment | p       | Specificity | Percent non-null |
|---------------------|--------|---|------------|---------|-------------|------------------|
| tacrolimus          | 0.421  | 3 | 0.718      | 0.04425 | 0.0828      | 66               |
| fenbufen            | 0.211  | 6 | 0.524      | 0.04666 | 0.0214      | 50               |
| etiocholanolone     | 0.369  | 6 | 0.522      | 0.04757 | 0.3228      | 66               |
| adenosine phosphate | 0.353  | 4 | 0.628      | 0.04776 | 0.0373      | 75               |
| bendroflumethiazide | -0.461 | 6 | -0.523     | 0.04807 | 0.0862      | 66               |
| nadide              | 0.536  | 4 | 0.626      | 0.04882 | 0.0643      | 75               |
| CP-944629           | 0.337  | 4 | 0.625      | 0.04933 | 0.0154      | 50               |

---

Supplementary Table 18 Prognostic gene-drug interactions predicted using CTD

| Chemical Name                                                             | Gene Symbol | Interaction Actions  |
|---------------------------------------------------------------------------|-------------|----------------------|
| 2-methyl-2H-pyrazole-3-carboxylic acid (2-methyl-4-o-tolylazophenyl)amide | SDC1        | decreases^expression |
| 2-methyl-2H-pyrazole-3-carboxylic acid (2-methyl-4-o-tolylazophenyl)amide | SDC1        | decreases^expression |
| abrine                                                                    | SDC1        | decreases^expression |
| Acetaminophen                                                             | SDC1        | decreases^expression |
| Acetaminophen                                                             | SDC1        | increases^expression |
| Adenine                                                                   | SDC1        | decreases^expression |
| afimoxifene                                                               | SDC1        | increases^expression |
| Aflatoxin B1                                                              | SDC1        | decreases^expression |
| Aflatoxin B1                                                              | SDC1        | increases^expression |
| Air Pollutants, Occupational                                              | SDC1        | decreases^expression |
| Arsenic Trioxide                                                          | SDC1        | decreases^expression |
| Benzo(a)pyrene                                                            | SDC1        | increases^expression |
| bisphenol A                                                               | SDC1        | increases^expression |
| Calcitriol                                                                | SDC1        | increases^expression |
| Camptothecin                                                              | SDC1        | increases^expression |
| chloropicrin                                                              | SDC1        | decreases^expression |
| Chondroitin Sulfate Proteoglycans                                         | SDC1        | increases^expression |
| Cisplatin                                                                 | SDC1        | increases^expression |
| Cisplatin                                                                 | SDC1        | decreases^expression |
| Cisplatin                                                                 | SDC1        | increases^expression |
| cobaltous chloride                                                        | SDC1        | decreases^expression |
| Colchicine                                                                | SDC1        | decreases^expression |
| Copper                                                                    | SDC1        | decreases^expression |
| Copper Sulfate                                                            | SDC1        | decreases^expression |
| Cyclosporine                                                              | SDC1        | decreases^expression |



| Chemical Name           | Gene Symbol | Interaction Actions  |
|-------------------------|-------------|----------------------|
| Daunorubicin            | SDC1        | increases^expression |
| Dexamethasone           | SDC1        | decreases^expression |
| Doxorubicin             | SDC1        | increases^expression |
| Dust                    | SDC1        | decreases^expression |
| Ethyl Methanesulfonate  | SDC1        | increases^expression |
| Etoposide               | SDC1        | increases^expression |
| Formaldehyde            | SDC1        | increases^expression |
| GW280264X               | SDC1        | increases^expression |
| Heparin                 | SDC1        | decreases^expression |
| Hydroxychloroquine      | SDC1        | decreases^expression |
| jinfukang               | SDC1        | increases^expression |
| jinfukang               | SDC1        | increases^expression |
| (+)-JQ1 compound        | SDC1        | decreases^expression |
| K 7174                  | SDC1        | decreases^expression |
| Methotrexate            | SDC1        | decreases^expression |
| Methyl Methanesulfonate | SDC1        | decreases^expression |
| Methyl Methanesulfonate | SDC1        | increases^expression |
| NSC 689534              | SDC1        | decreases^expression |
| obeticholic acid        | SDC1        | increases^expression |
| Oxaliplatin             | SDC1        | increases^expression |
| Oxygen                  | SDC1        | decreases^expression |
| Plant Extracts          | SDC1        | decreases^expression |
| Progesterone            | SDC1        | decreases^expression |
| Smoke                   | SDC1        | decreases^expression |
| Sulfasalazine           | SDC1        | decreases^expression |

| Chemical Name                                                        | Gene Symbol | Interaction Actions  |
|----------------------------------------------------------------------|-------------|----------------------|
| Sunitinib                                                            | SDC1        | decreases^expression |
| Tetrachlorodibenzodioxin                                             | SDC1        | decreases^expression |
| Tetradecanoylphorbol Acetate                                         | SDC1        | decreases^expression |
| Thimerosal                                                           | SDC1        | decreases^expression |
| Tretinoin                                                            | SDC1        | decreases^expression |
| Valproic Acid                                                        | SDC1        | decreases^expression |
| Zoledronic Acid                                                      | SDC1        | decreases^expression |
| 1-Methyl-3-isobutylxanthine                                          | SORBS1      | increases^expression |
| 1-Methyl-4-phenylpyridinium                                          | SORBS1      | decreases^expression |
| 4-(5-benzo(1,3)dioxol-5-yl-4-pyridin-2-yl-1H-imidazol-2-yl)benzamide | SORBS1      | increases^expression |
| abrine                                                               | SORBS1      | increases^expression |
| Aflatoxin B1                                                         | SORBS1      | decreases^expression |
| Aldehydes                                                            | SORBS1      | increases^expression |
| Benzo(a)pyrene                                                       | SORBS1      | decreases^expression |
| bisphenol A                                                          | SORBS1      | increases^expression |
| butyraldehyde                                                        | SORBS1      | increases^expression |
| Cisplatin                                                            | SORBS1      | increases^expression |
| clothianidin                                                         | SORBS1      | increases^expression |
| cupric chloride                                                      | SORBS1      | decreases^expression |
| Cyclosporine                                                         | SORBS1      | decreases^expression |
| Decitabine                                                           | SORBS1      | decreases^expression |
| Demecolcine                                                          | SORBS1      | increases^expression |
| Dexamethasone                                                        | SORBS1      | increases^expression |
| Dexamethasone                                                        | SORBS1      | increases^expression |
| dorsomorphin                                                         | SORBS1      | increases^expression |

| Chemical Name                        | Gene Symbol | Interaction Actions  |
|--------------------------------------|-------------|----------------------|
| Doxorubicin                          | SORBS1      | decreases^expression |
| Ethyl Methanesulfonate               | SORBS1      | increases^expression |
| Formaldehyde                         | SORBS1      | increases^expression |
| Genistein                            | SORBS1      | increases^expression |
| incobotulinumtoxinA                  | SORBS1      | decreases^expression |
| Indomethacin                         | SORBS1      | increases^expression |
| Isotretinoin                         | SORBS1      | decreases^expression |
| (+)-JQ1 compound                     | SORBS1      | increases^expression |
| Lactic Acid                          | SORBS1      | decreases^expression |
| Methyl Methanesulfonate              | SORBS1      | increases^expression |
| methylselenic acid                   | SORBS1      | increases^expression |
| Nickel                               | SORBS1      | decreases^expression |
| NSC 689534                           | SORBS1      | increases^expression |
| pentanal                             | SORBS1      | increases^expression |
| perfluorooctanoic acid               | SORBS1      | decreases^expression |
| Progesterone                         | SORBS1      | increases^expression |
| propionaldehyde                      | SORBS1      | increases^expression |
| Rifampin                             | SORBS1      | decreases^expression |
| Silicon Dioxide                      | SORBS1      | increases^expression |
| Smoke                                | SORBS1      | decreases^expression |
| trichostatin A                       | SORBS1      | increases^expression |
| Triclosan                            | SORBS1      | decreases^expression |
| tris(1,3-dichloro-2-propyl)phosphate | SORBS1      | decreases^expression |
| Urethane                             | SORBS1      | increases^expression |
| Valproic Acid                        | SORBS1      | increases^expression |
| Valproic Acid                        | SORBS1      | increases^expression |

**A**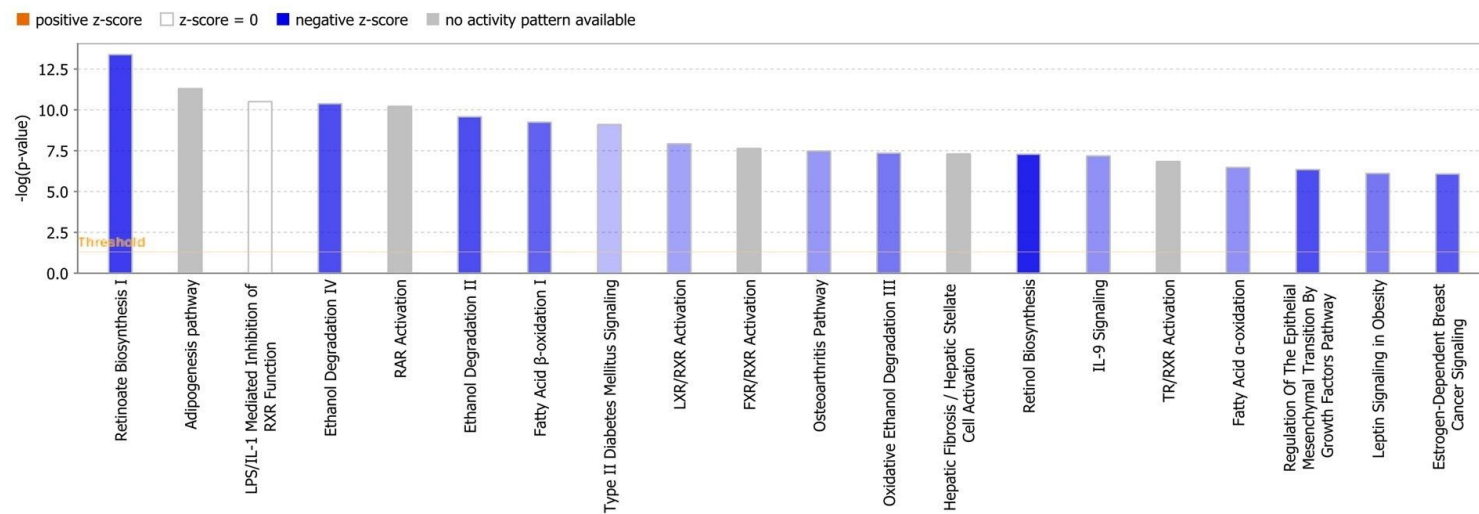**B**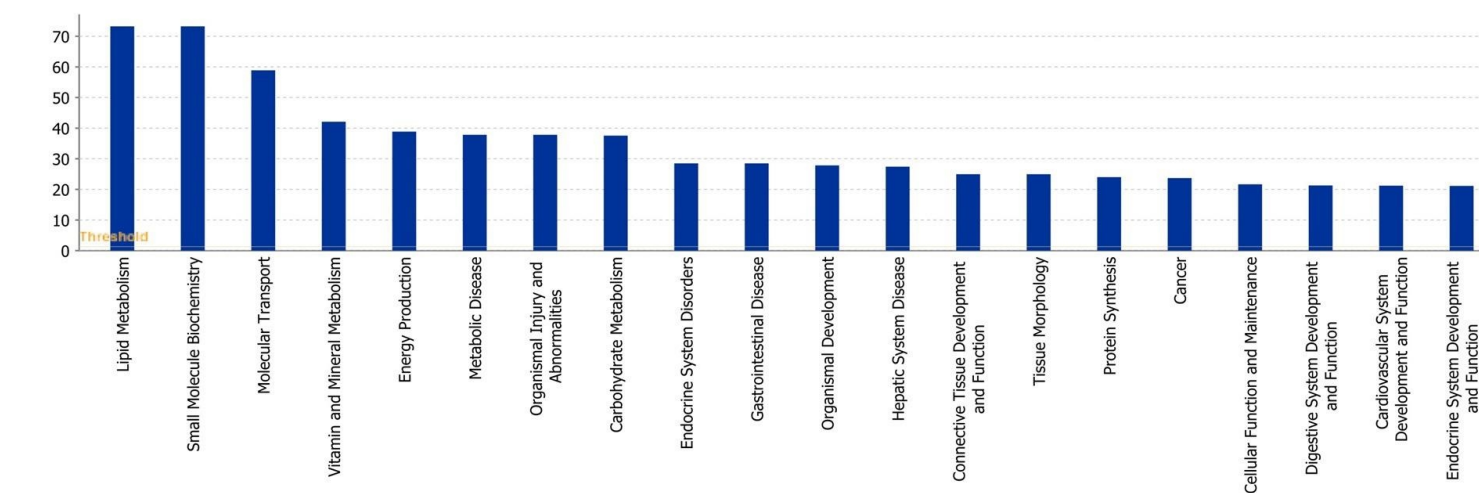**C**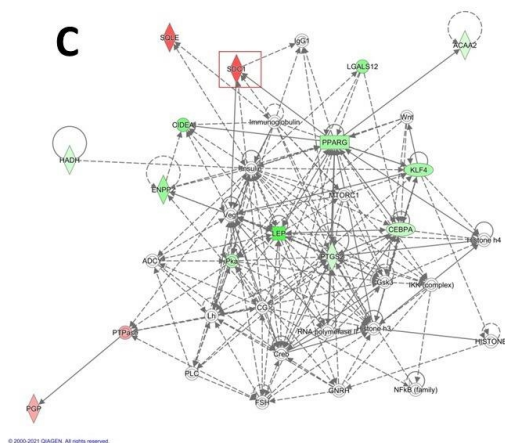**D**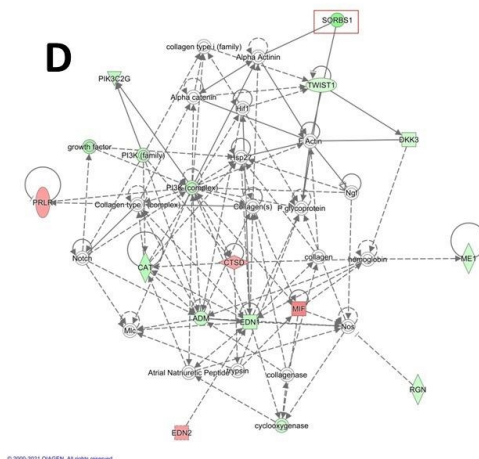**E**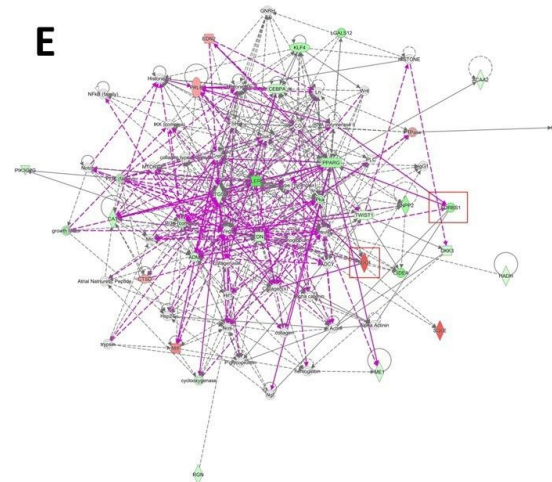

**Supplementary Figure 1** Candidate gene validation IPA network analysis (A) TOP20 classic pathways identified by IPA analysis. (B) TOP20 diseases and functional pathways identified by IPA analysis. (C) The IPA analysis of *SDC1*-related interaction network. (D) The IPA analysis of *SORBS1*-related interaction network. (E) The IPA analysis of the interaction network between *SCD1* and *SORBS1*.

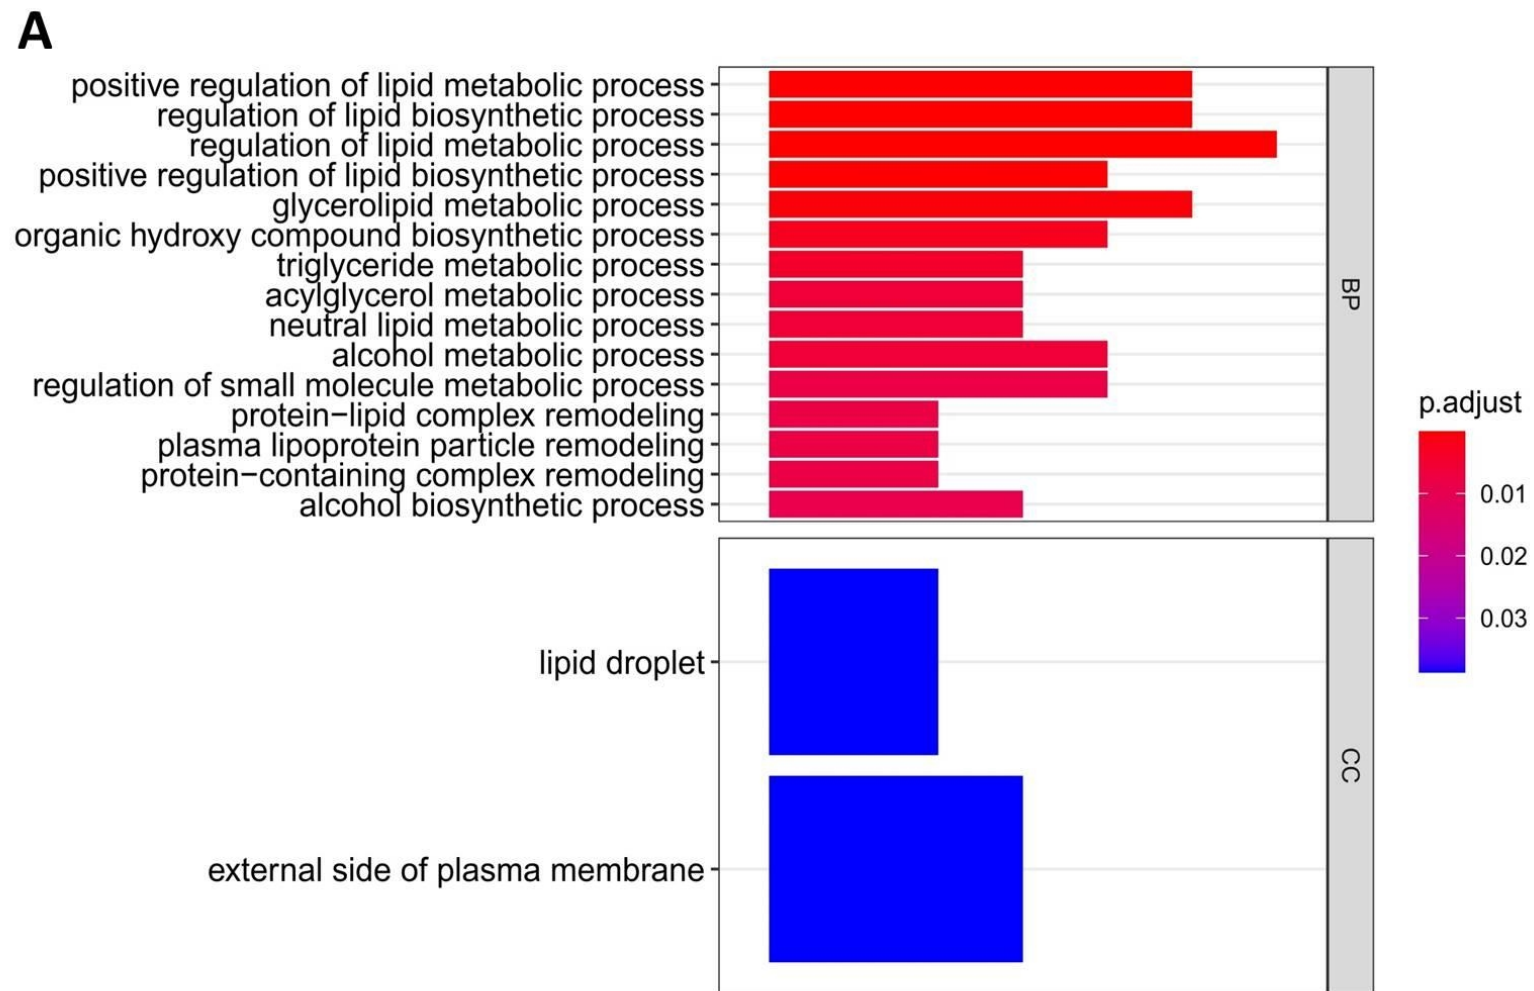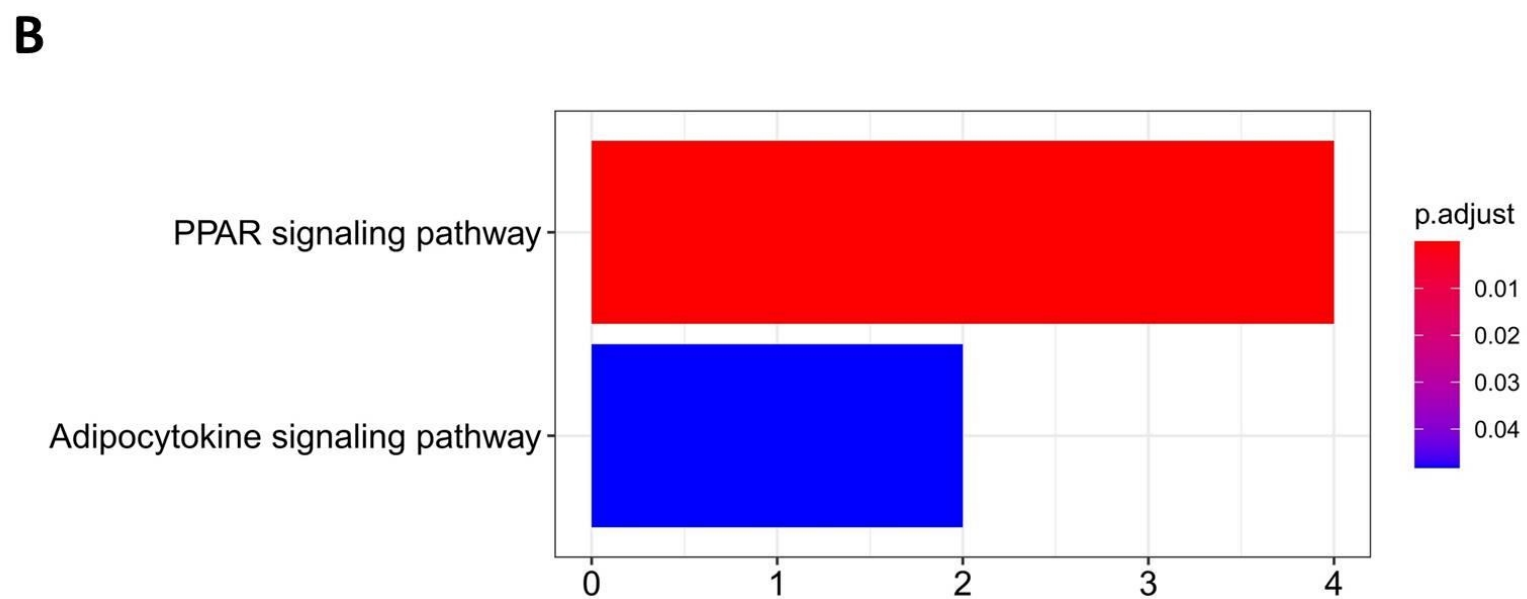

**Supplementary Figure 2** GO and KEGG pathway analysis of prognosis-related lipid metabolism genes. (A) TOP15 GO term enrichment analysis of lipid metabolism-related DEGs. The abscissa indicates gene ratio and the enriched pathways were presented in the ordinate. (B) KEGG pathway enrichment analysis of lipid metabolism-related DEGs. The abscissa indicates gene ratio and the enriched pathways were presented in the ordinate. DEGs, differentially expressed genes; TCGA, The Cancer Genome Atlas; GSE, GEO Series; GO, Gene Ontology; KEGG, Kyoto Encyclopedia of Genes and Genomes.

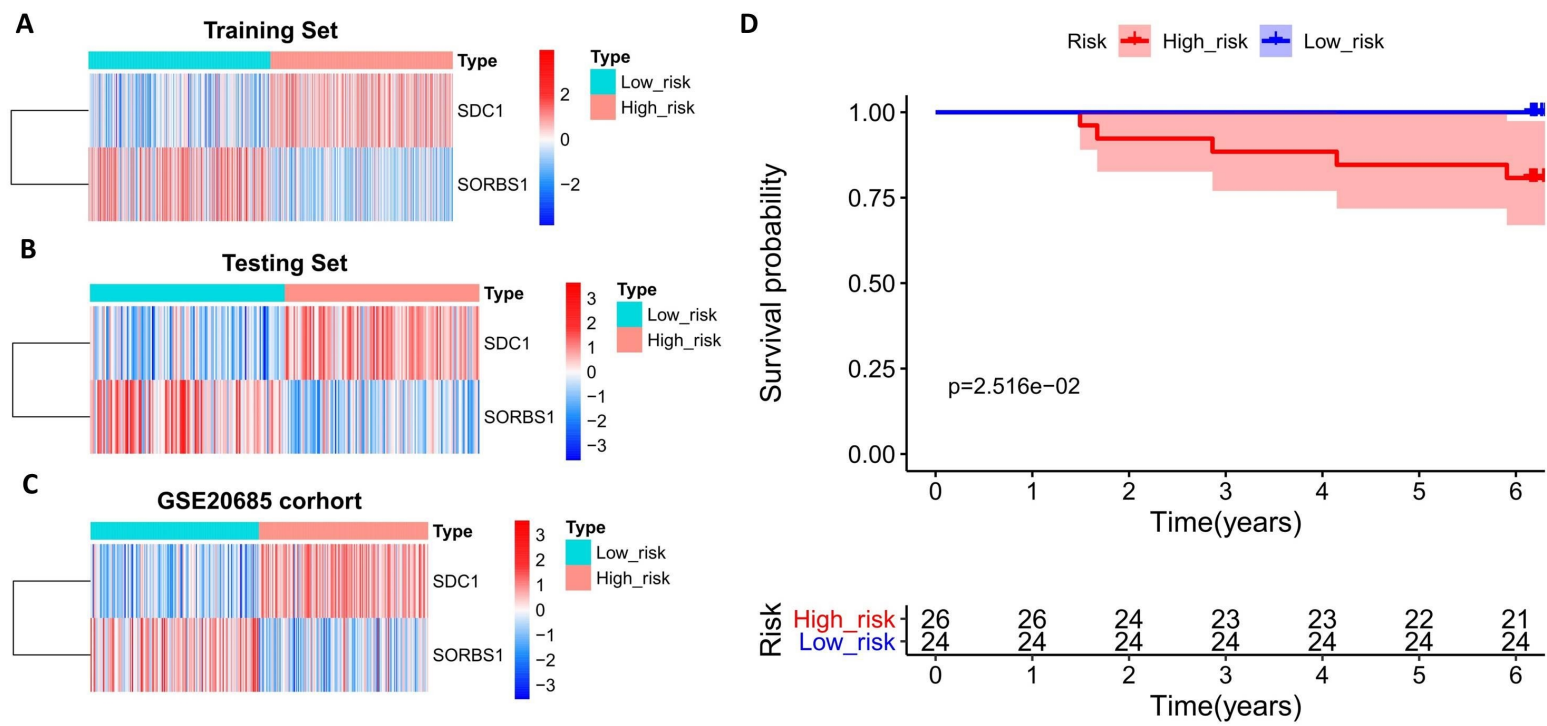

**Supplementary Figure 3** Expression heat map of model genes and clinical cases' survival status in high and low risk groups. **(A)** Expression heat map of *SDC1* and *SORBS1* in training set. **(B)** Expression heat map of *SDC1* and *SORBS1* in testing set. **(C)** Expression heat map of *SDC1* and *SORBS1* in GSE20685 authentication set. **(D)** The survival status of high and low risk groups in the 50 clinical cases.

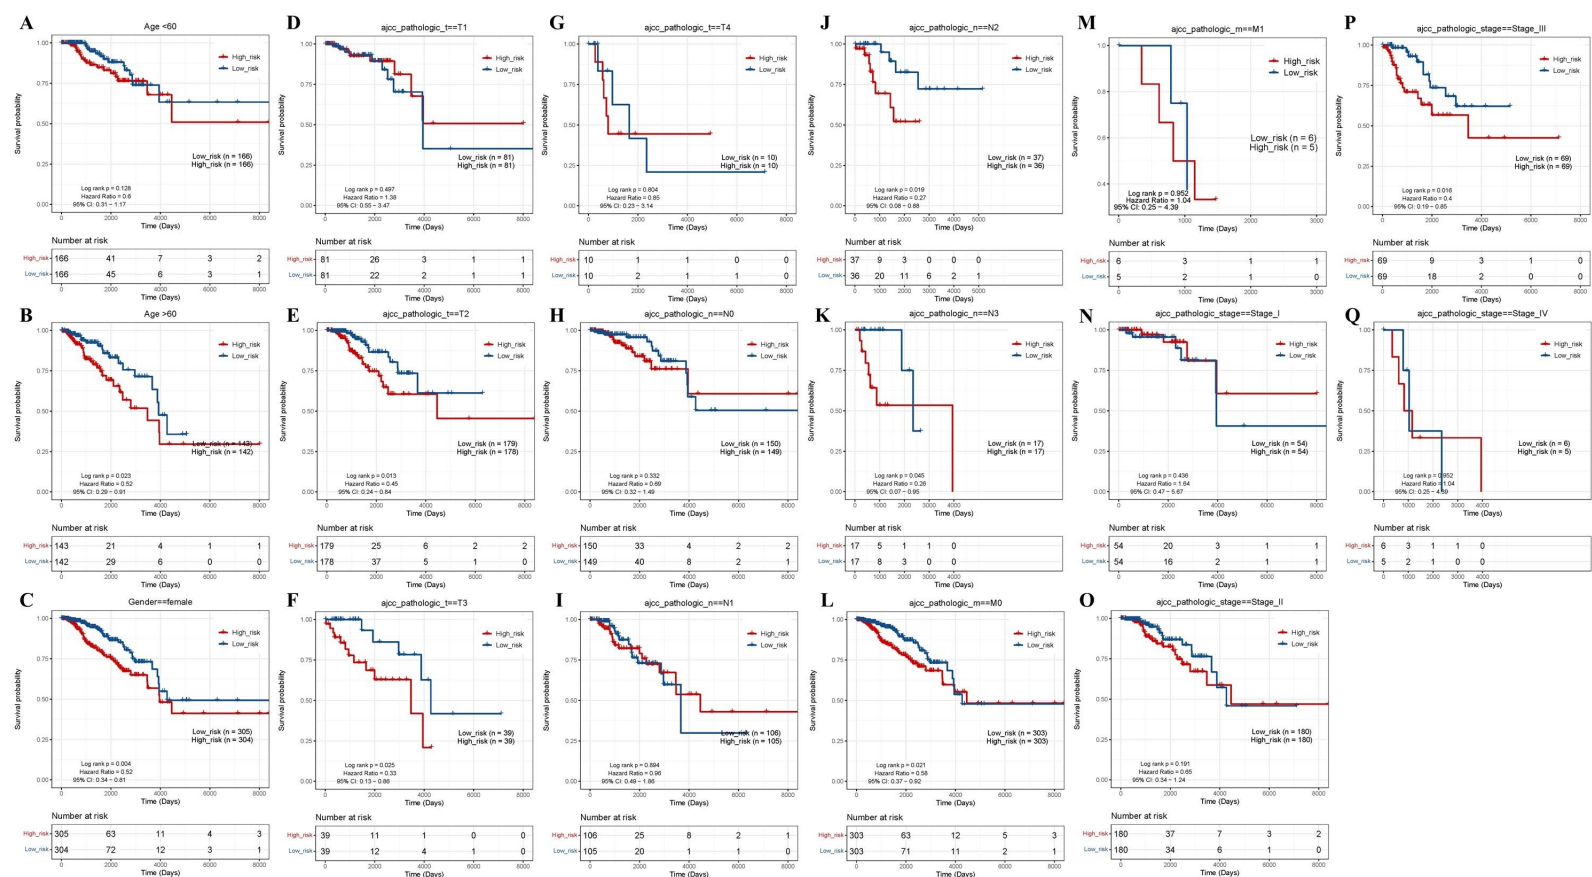

**Supplementary Figure 4** KM survival subgroup analysis of TCGA-training set according to the 2-gene signature stratified by clinical characteristics. **(A,B)** The 2-gene signature stratified subgroups defined by whether the patient population was older than 60 using Kaplan-Meier analysis. **(C)** The 2-gene signature stratified subgroups defined by gender using Kaplan-Meier analysis. **(D,E,F,G)** The 2-gene signature stratified subgroups defined by pathologic T-stage using Kaplan-Meier analysis. **(H,I,J,K)** The 2-gene signature stratified subgroups defined by pathologic N-stage using Kaplan-Meier analysis. **(L,M)** The 2-gene signature stratified subgroups defined by pathologic M-stage using Kaplan-Meier analysis. **(N,O,P,Q)** The 2-gene signature stratified subgroups defined by pathologic tumor stage using Kaplan-Meier analysis.

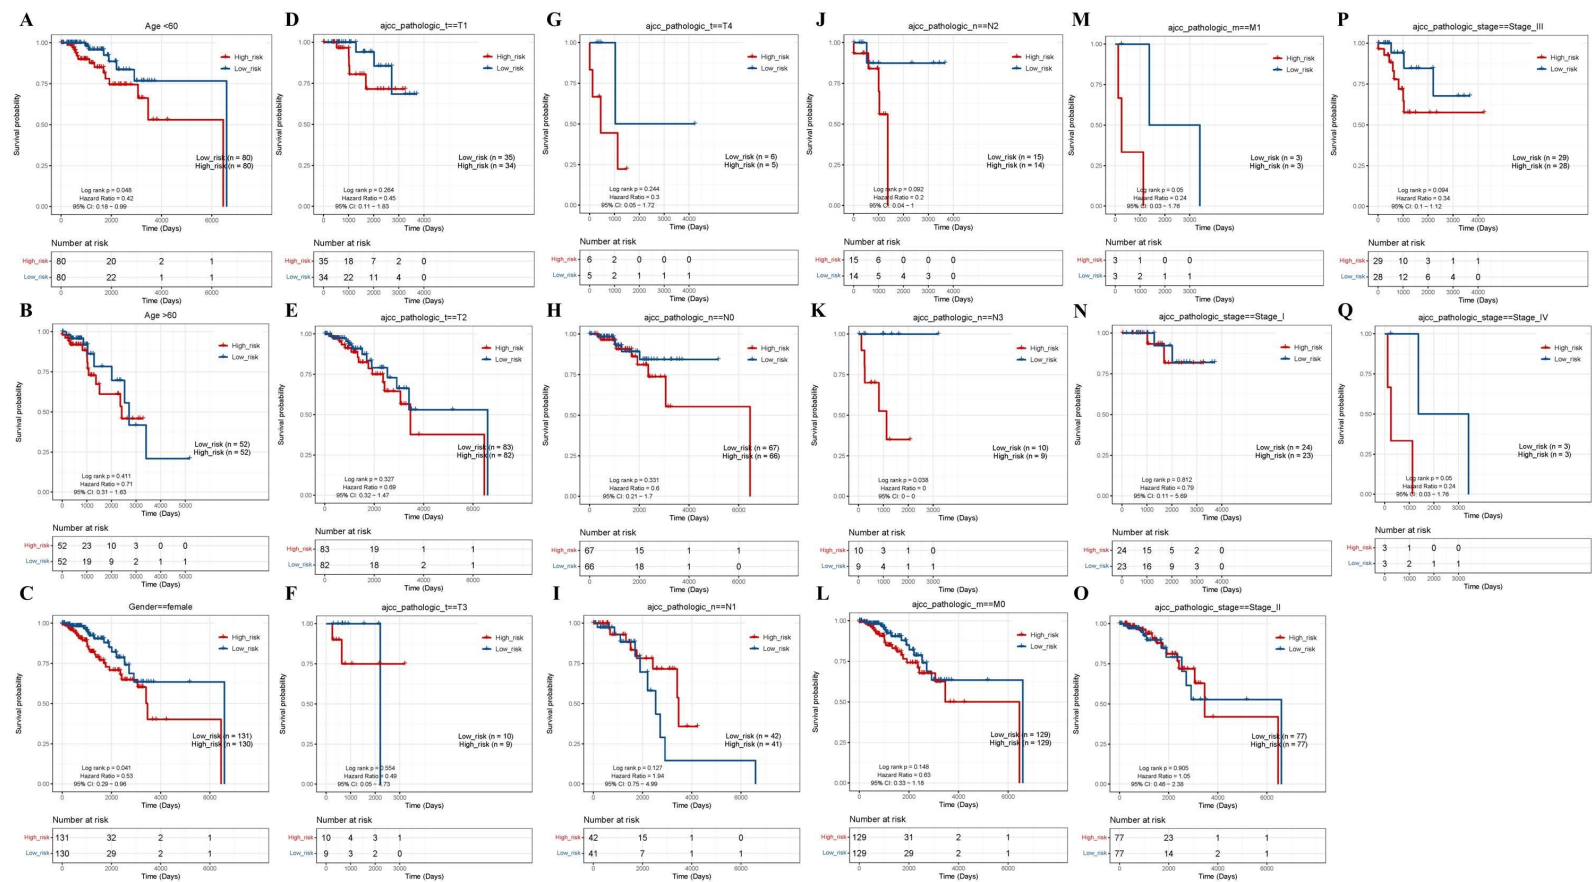

**Supplementary Figure 5** KM survival subgroup analysis of TCGA-test set according to the 2-gene signature stratified by clinical characteristics. **(A,B)** The 2-gene signature stratified subgroups defined by whether the patient population was older than 60 using Kaplan-Meier analysis. **(C)** The 2-gene signature stratified subgroups defined by gender using Kaplan-Meier analysis. **(D,E,F,G)** The 2-gene signature stratified subgroups defined by pathologic T-stage using Kaplan-Meier analysis. **(H,I,J,K)** The 2-gene signature stratified subgroups defined by pathologic N-stage using Kaplan-Meier analysis. **(L,M)** The 2-gene signature stratified subgroups defined by pathologic M-stage using Kaplan-Meier analysis. **(N,O,P,Q)** The 2-gene signature stratified subgroups defined by pathologic tumor stage using Kaplan-Meier analysis.

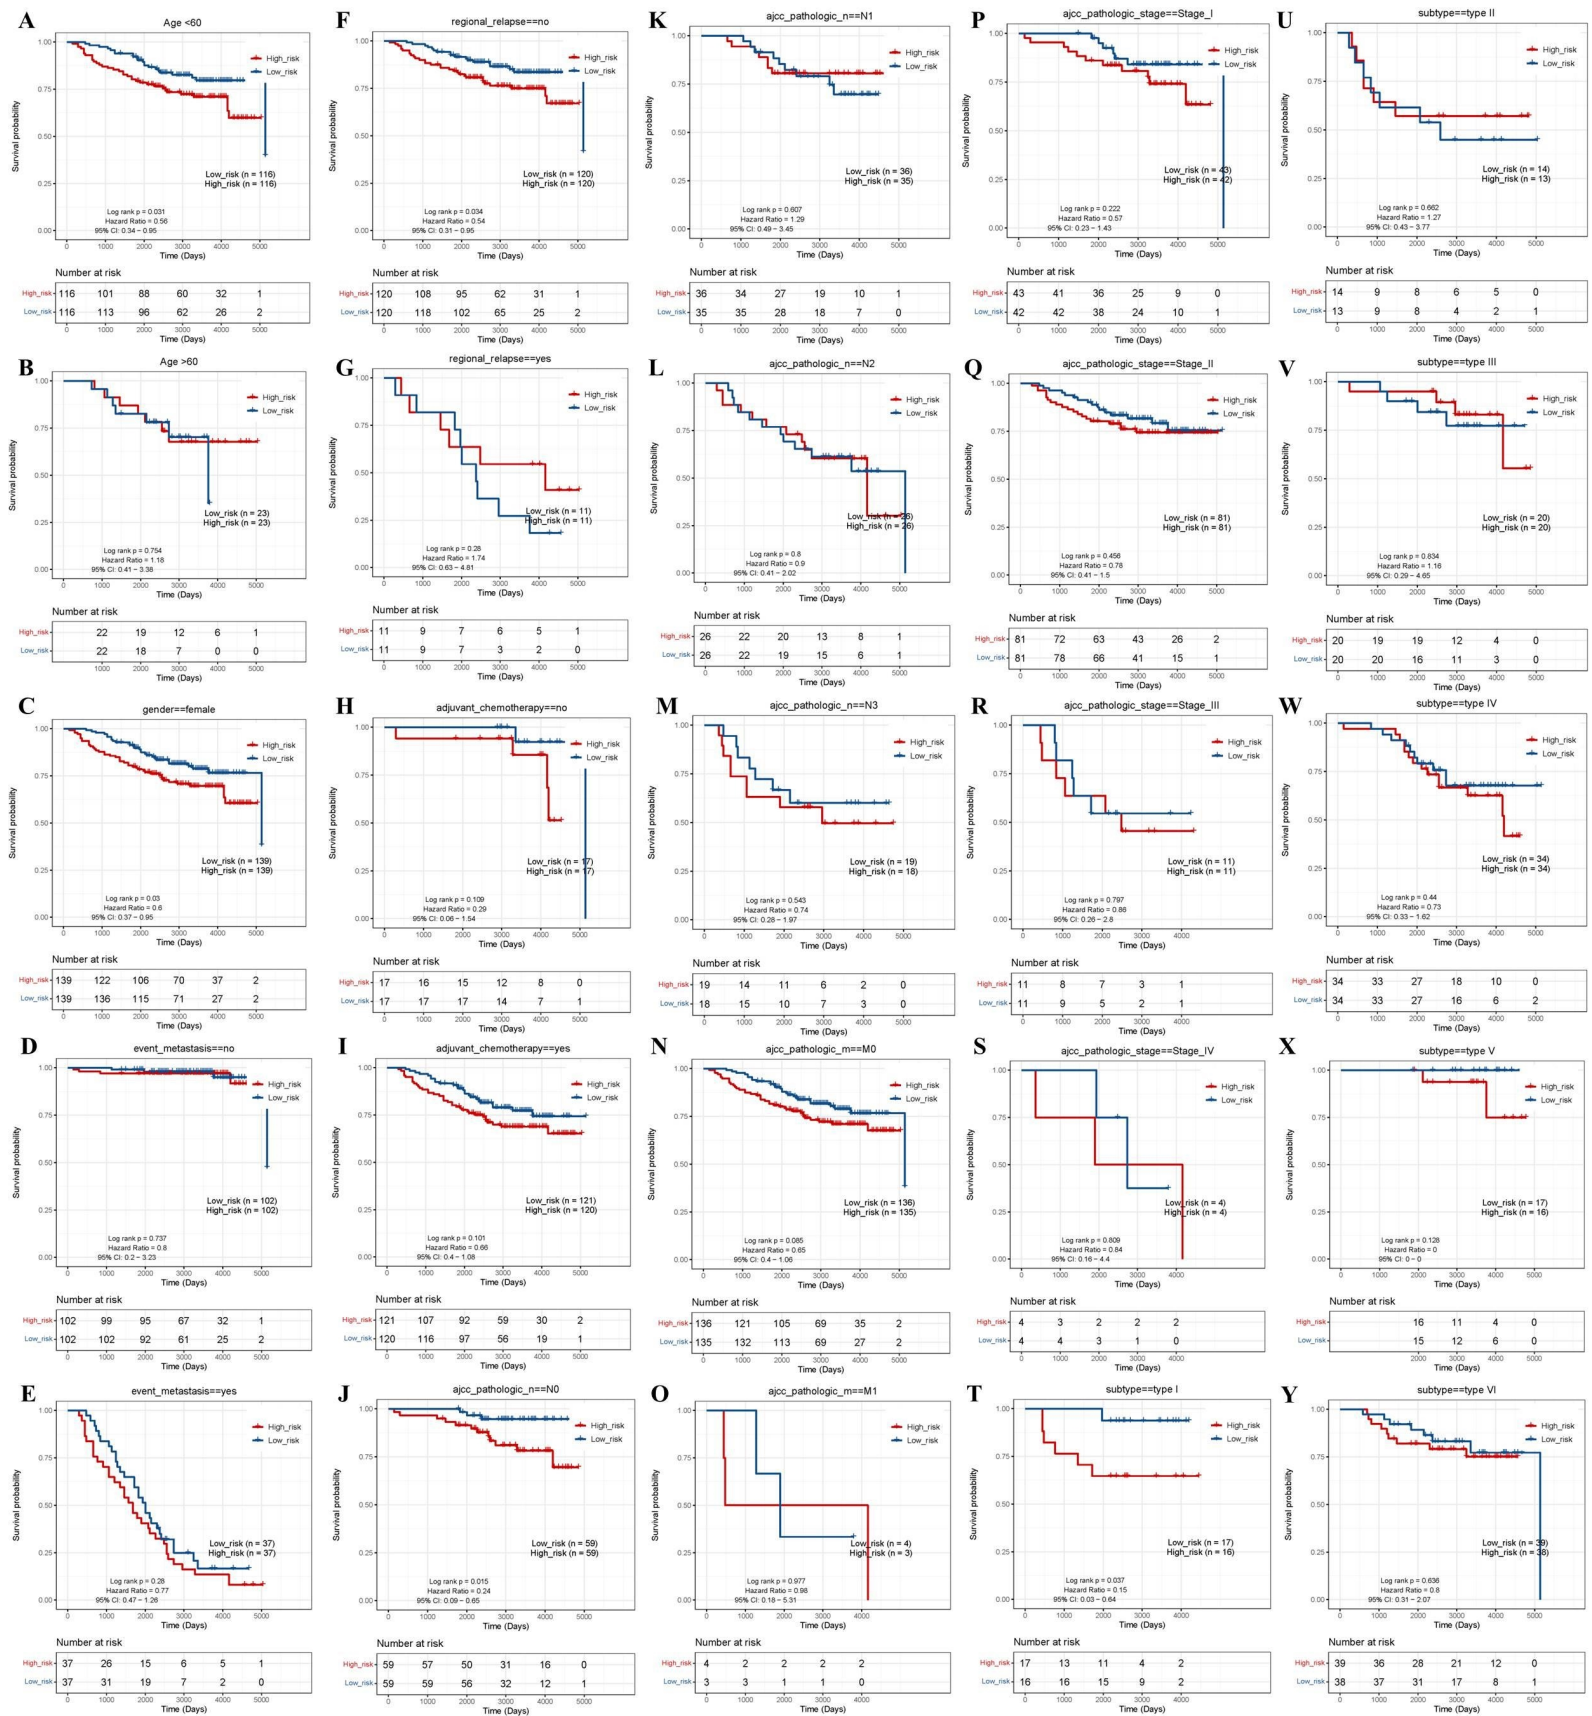

**Supplementary Figure 6** KM survival subgroup analysis of independent external validation set according to the 2-gene signature stratified by clinical characteristics. **(A,B)** The 2-gene signature stratified subgroups defined by whether the patient population was older than 60 using Kaplan-Meier analysis. **(C)** The 2-gene signature stratified subgroups defined by gender using Kaplan-Meier analysis. **(D,E)** The 2-gene signature stratified subgroups defined by metastatic events using Kaplan-Meier analysis. **(F,G)** The 2-gene signature stratified subgroups defined by pathologic T-stage using Kaplan-Meier analysis. **(H,I)** The 2-gene signature stratified subgroups defined by regional recurrence using Kaplan-Meier analysis. **(J,K,L,M)** The 2-gene signature stratified subgroups defined by pathologic N-stage using Kaplan-Meier analysis. **(N,O)** The 2-gene signature stratified subgroups defined by pathologic M-stage using Kaplan-Meier analysis. **(P,Q,R,S)** The 2-gene signature stratified subgroups defined by pathologic tumor stage using Kaplan-Meier analysis. **(T,U,V,W,X,Y)** The 2-gene signature stratified subgroups defined by subtype using Kaplan-Meier analysis.



**A**

Normal

Breast cancer

SDC1

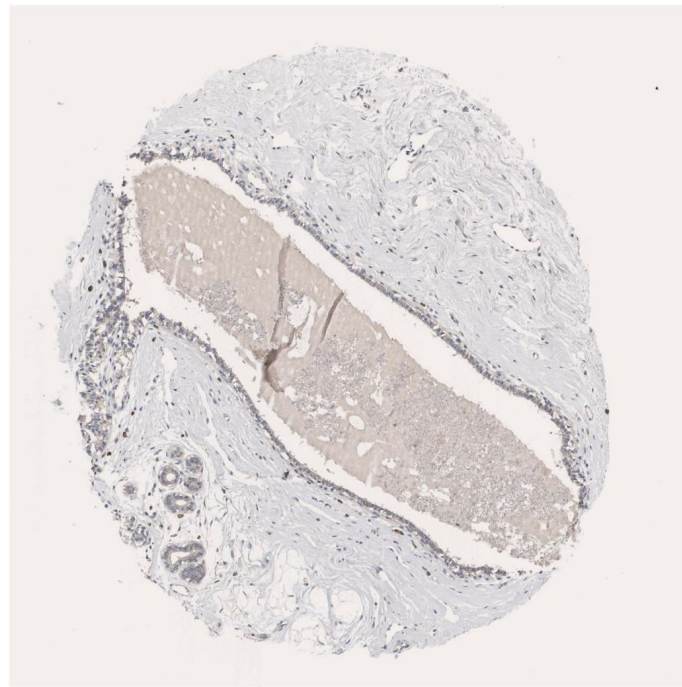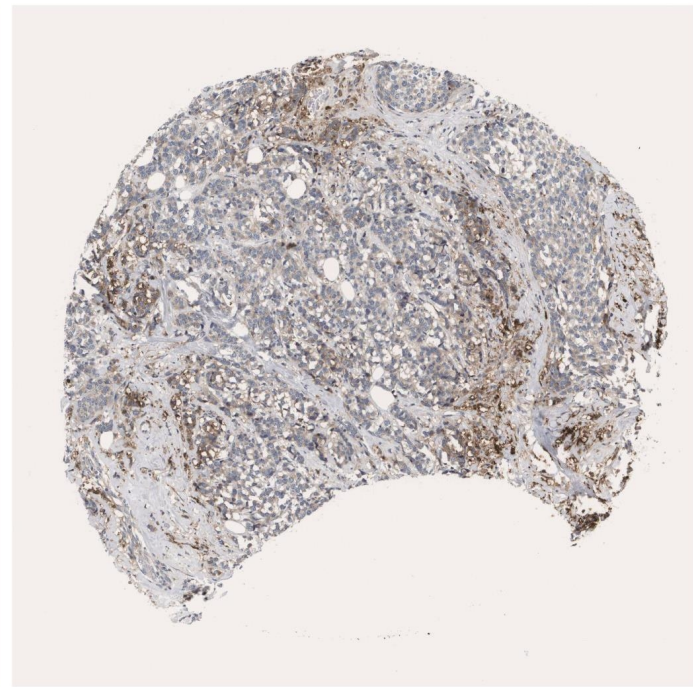

Patient ID: 3544  
Sex: Female  
Age: 45  
Staining: Not detected  
Intensity: Weak  
Quantity: <25%

Patient ID: 2805  
Sex: Female  
Age: 59  
Staining: Medium  
Intensity: Moderate  
Quantity: 75%-25%

Antibody: HPA006185

**B**

Normal

Breast cancer

SORBS1

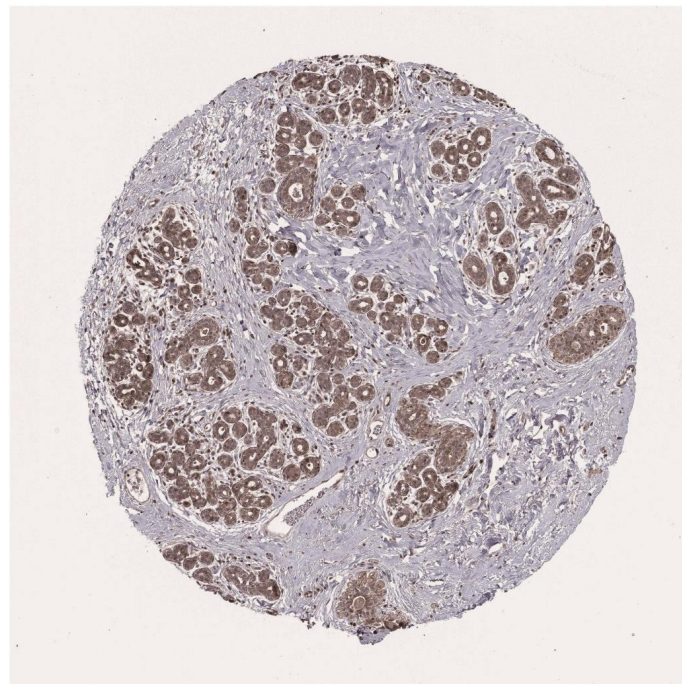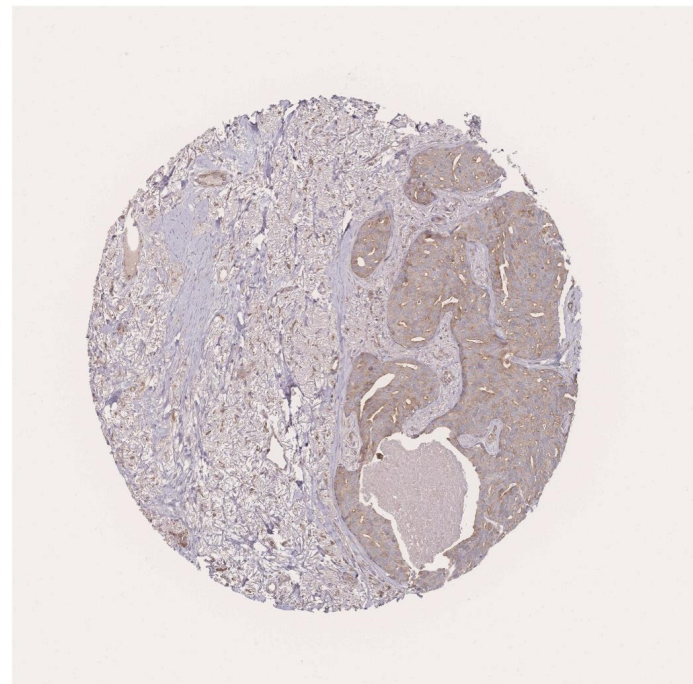

Patient ID: 2104  
Sex: Female  
Age: 43  
Staining: Medium  
Intensity: Moderate  
Quantity: >75%

Patient ID: 1268  
Sex: Female  
Age: 54  
Staining: Low  
Intensity: Weak  
Quantity: >75%

Antibody: CAB032850

**Supplementary Figure 7** Immunohistochemical results of SDC1 and SORBS1 in BRCA and normal tissues in HPA database. **(A)** Immunohistochemical results of SDC1 in BRCA and normal tissues. **(B)** Immunohistochemical results of SORBS1 in BRCA and normal tissues.

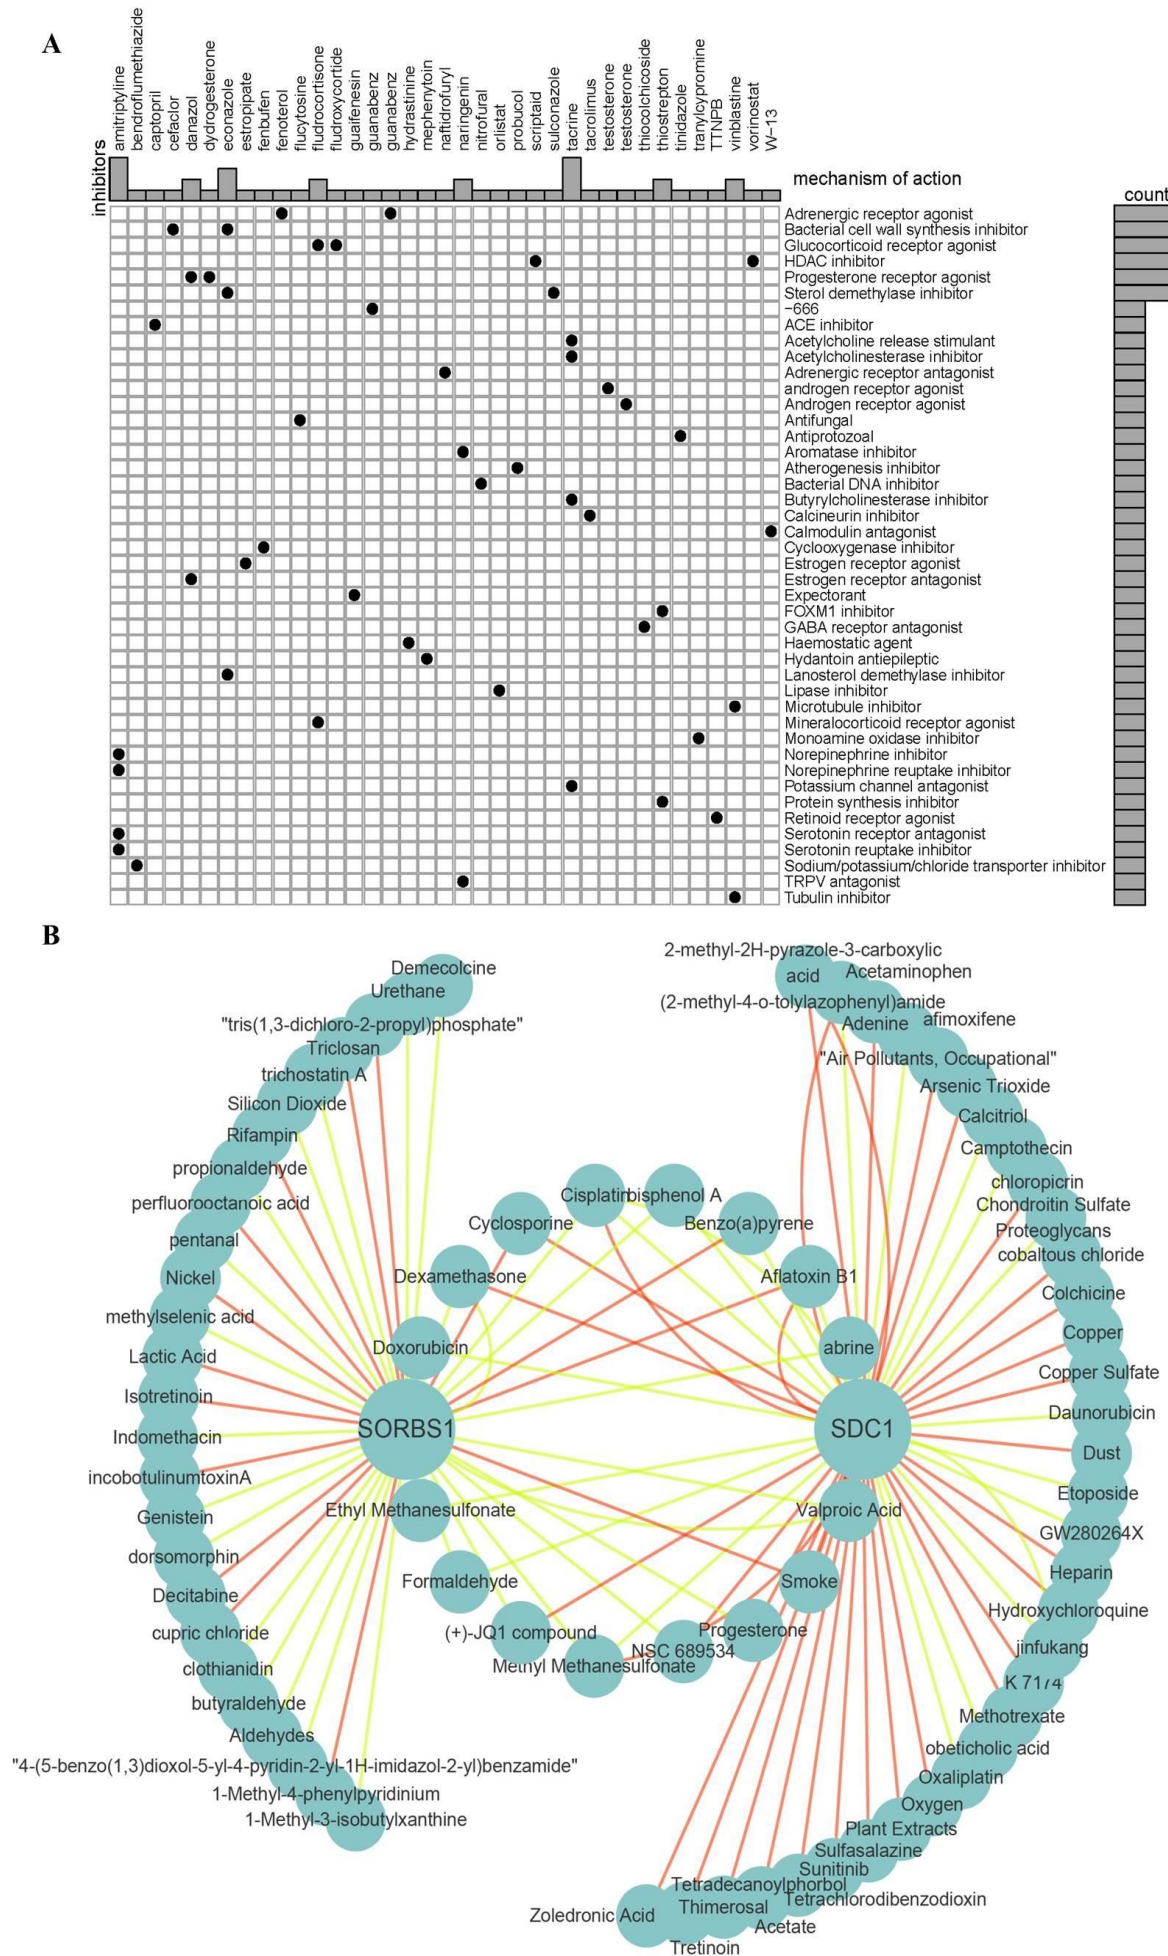

**Supplementary Figure 8** MoA analysis results via CMap database and interactions between prognostic genes and drugs used for cancer treatment. **(A)** A heatmap showing each compound (perturbagen) from the CMap that shares a MoA (rows). The compounds in this heatmap have an absolute value of enrichment score 0.5 and might be capable of targeting the metabolism-related signature. Two drugs (fenoterol and guanabenz) have the MoA of Adrenergic receptor agonist; Two drugs (cefaclor and cetergoline) share MoA of Bacterial cell wall synthesis inhibitor; Two drugs (fludrocortisone and fludroxycortide) share the MoA of Glucocorticoid receptor agonist; Two drugs (scriptaid and vorinostat) shared the MoA of HDAC inhibitor. Two drugs (danazol and Dydrogesterone) share the MoA of Progesterone receptor agonist; Two drugs (econazole and fluconazole) shared the MoA of Sterol demethylase inhibitor. **(B)** Red indicates that the drug increases expression of the biomarkers, while green indicates that the drug decreases expression of the biomarkers. CMap, Connectivity Map; MoA, mode of action.
